# Supplementary material for: Computational and experimental identification of mirtrons inDrosophila melanogasterandCaenorhabditis elegans
Source: HighWire-hosted journal article supplement (doi:10.1101/gr.113050.110), 2010-12-22
Supplement: Table_S1_fly_mirtron_libs.xlsx [file Table_S1_fly_mirtron_libs.xlsx]

## Sheet: tableS1 fly libraries
Library	name2	modENCODE DCC ID	description	Total	Clipped	Mapped
GSM154618	GSM154618		23-29 nucleotide RNAs from Drosophila melanogaster ovaries	4734	4734	4716
GSM154620	GSM154620		piRNAs associated with Piwi from Drosophila melanogaster ovaries	not available	17709	17586
GSM154621	GSM154621		piRNAs associated with Ago3 from Drosophila melanogaster ovaries	23376	23376	23039
GSM154622	GSM154622		piRNAs associated with Aubergine from Drosophila melanogaster ovaries	not available	14873	14803
GSM180328	GSM180328		adult heads (female heads, male heads)	193680	148358	94142
GSM180329	GSM180329		adult bodies (female bodies, male bodies)	198654	129865	75305
GSM180330	GSM180330		very early embryo (0-1)	195286	154315	100736
GSM180331	GSM180331		early embryo (2-6)	279040	188418	121008
GSM180332	GSM180332		mid embryo (6-10)	105285	71004	51979
GSM180333	GSM180333		late embryo (12-24)	203380	137174	98609
GSM180334	GSM180334		larvae: 1st instar and 3rd instars	256708	156249	108099
GSM180335	GSM180335		imaginal discs	258956	186068	140287
GSM180336	GSM180336		pupae: 0-1 day, 0-2 day, 2-4 day	197226	114170	70853
GSM180337	GSM180337		tissue culture cells (S2 only)	186883	128957	68239
GSM231091	GSM231091		PIWI-associated piRNA in Drosophila melanogaster ovary (454 Pyrosequencing, 2006)	19048	18302	17902
GSM239041	GSE9389HeadNB		fly heads, non beta-eliminated	105976	105976	91096
GSM239050	GSE9389HeadB		fly heads, beta-eliminated	42354	42354	28994
GSM239051	GSE9389S2B		S2 cells, beta-eliminated	113709	113709	69348
GSM239052	GSE9389S2NB		S2 cells, non beta-eliminated	99003	99003	78744
GSM246084	GSM246084		D. melanogaster adult male heads 454	31197	29755	19851
GSM266765	GSM266765		Siomi Lab fruit fly S2 AGO2 Cloned Sequences v1.0	77327	76608	53265
GSM280082	GSM280082	modENCODE_773	WT ovaries (18-29nt)	1271310	1074562	895582
GSM280083	GSM280083	modENCODE_526	dcr-2-/- ovaries (18-29nt)	1439867	1251378	1001726
GSM280084	GSM280084	modENCODE_774	loqs-/- ovaries (18-29nt)	2672158	2490211	1926256
GSM280085	GSM280085	modENCODE_772	WT testes (18-24nt)	773948	673024	552491
GSM280086	GSM280086	modENCODE_2381	WT ovaries (AGO2IP)	53493	14642	2887
GSM280087	GSM280087	modENCODE_2379	S2cell (AGO2IP)	2052481	1933805	909893
GSM280088	GSM280088	modENCODE_2380	S2cell (AGO1IP)	2557899	2396597	2074352
GSM343287	GSM343287		Drosophila Toll 10b mutant embryos	5217060	4991510	1699552
GSM379050	GSM379050		Armi Heterozygote	2389266	2300804	2608174
GSM379051	GSM379051		Armi Mutant	1952706	1765327	2126177
GSM379052	GSM379052		Aub Heterozygote	2344859	2256145	2223797
GSM379053	GSM379053		Aub Mutant	2708529	2391030	2490734
GSM379054	GSM379054		Flam Heterozygote	2507110	2371049	2093538
GSM379055	GSM379055		Flam Mutant	1623489	1456649	1719319
GSM379056	GSM379056		Krimp Heterozygote	3727451	2561341	2967156
GSM379057	GSM379057		Krimp Mutant	4399183	3115040	2879956
GSM379058	GSM379058		Piwi Heterozygote	3925326	2822212	2638282
GSM379059	GSM379059		Piwi Mutant	2732889	2544906	2851753
GSM379060	GSM379060		SpnE Heterozygote	3164234	3035248	3169242
GSM379061	GSM379061		Squ Heterozygote	1923697	1719720	1916121
GSM379062	GSM379062		Squ Mutant	2546941	2262183	2702011
GSM379063	GSM379063		Vasa Heterozygote	4343442	2951260	3089918
GSM379064	GSM379064		Vasa Mutant	3952489	2837437	3621183
GSM379065	GSM379065		Zuc Heterozygote	4441193	3212885	3478432
GSM379066	GSM379066		Zuc Mutant	3014085	2902893	2731755
GSM379067	GSM379067		SpnE Mutant	1725425	1348174	959822
GSM424739	GSM424739		S2 parental	not available	1098002	949746
GSM424740	GSM424740		S2 pKF63 stably transfected	not available	2678671	2407527
GSM424741	GSM424741		S2 pKF63 transiently transfected	not available	199418	163372
GSM467729	GSM467729		WT	25072677		2438489
GSM467730	GSM467730		r2d2	24196794		1679215
GSM467731	GSM467731		loq	23566713		1307625
OSS2	GSM385744	modENCODE_2605	Drosophila OSS cell small RNA libraries, rep1	6787127	5612344	3836300
OSS6	GSM385748	modENCODE_2605	Drosophila OSS cell small RNA libraries, rep2	7051406	5870704	4006148
OSS7	GSM385821	modENCODE_2605	Drosophila OSS cell small RNA libraries, rep3	5298560	4365980	3039313
OSS8	GSM385822	modENCODE_2605	Drosophila OSS cell small RNA libraries, rep4	5740923	4868875	3181217
S1	GSM286601	modENCODE_747	Male heads	821064	474642	199957
S10	GSM286605	modENCODE_740	2-6hr embryo	5414914	3643891	2451133
S11	GSM286606	modENCODE_752	2-6hr embryo #1	3652097	1563469	491226
S12	GSM286607	modENCODE_754	6-10hr embryo	3109774	1935482	1093127
S13	GSM286611	modENCODE_753	6-10hr embryo #1	2538726	1630216	1021932
S14	GSM286613	modENCODE_745	0-1hr embryo #1	3295734	2414523	1745250
S15	GSM272652	modENCODE_746	Drosophila melanogaster S2-GMR, first biological replicate	3832946	2435707	1488185
S16	GSM272653	modENCODE_738	KC cells	3463891	2193804	1026495
S17	GSM322245	modENCODE_749	small RNA from 3rd instar larvae (2)	3218432	583870	264665
S18	GSM322208	modENCODE_748	small RNA from 3rd instar larvae (1)	3286468	2481560	1980182
S19	GSM322219	modENCODE_757	small RNA from 2-4 day old pupae (1)	3450899	2041432	936746
S2	GSM240749	modENCODE_737	Female heads	1403625	921258	434992
S20	GSM322338	modENCODE_758	small RNA from 2-4 day old pupae (2)	2791348	2042865	1578264
S21	GSM399105	modENCODE_2376	dmel_imaginal-disc-brain	2827170	2200167	1737464
S22	GSM322533	modENCODE_750	small RNAs from adult female head	2732433	1702484	1080290
S23	GSM399106	modENCODE_2555	dmel_female_body	4983208	3298169	1942586
S24	GSM399107	modENCODE_2554	dmel_male_body	5466610	4074137	2813749
S25	GSM360256	modENCODE_762	small RNA from 1st instar larvae (1)	5602287	3989121	3457530
S26	GSM360257	modENCODE_2546	small RNA from 1st instar larvae (2)	5072787	3754657	3272672
S27	GSM360260	modENCODE_2543	small RNA from 0-1 day old pupae	6311152	4110666	3094213
S28	GSM360262	modENCODE_2556	small RNA from 0-2 day old pupae	6214950	4250987	2967039
S29	GSM322543	modENCODE_751	small RNAs from adult male head	5717347	4507935	3027395
S3	GSM286602	modENCODE_739	Male body	1490453	802074	347518
S30	GSM361908	modENCODE_2725	Drosophila melanogaster S2-GMR, second biological replicate	6698595	4021346	2285156
S31	GSE24542	modENCODE_2973	s2+48 #1	6192933	4139578	2267808
S32	GSE24543	modENCODE_2973	S2+48 #2	10321777	6332236	3683069
S33	GSM399110	modENCODE_2374	dmel_Kc	10327412	6736900	3149186
S34	GSE24543	modENCODE_2974	KC+48 #1	3767341	1929986	839278
S35	GSE24544	modENCODE_2974	KC+48 #2	4235645	2150118	994594
S4	GSM286603	modENCODE_743	Female body	1263160	905343	556497
S5	GSM275691	modENCODE_742	Imaginal disc	1739032	1327275	1141254
S7	GSM364902	modENCODE_2741	small RNA from 12-24hr embryo	580738	472345	395171
S8	GSM272651	modENCODE_741	S2 and KC cells	1356532	714336	390325
S9	GSM286604	modENCODE_755	0-1hr embryo	5678039	3885295	2612162
SRR001337	GSM278573		WT_females_beta-eliminated	1587867	244253	60091
SRR001338	GSM278707		IR_non-beta-eliminated	3352228	2222058	1298475
SRR001339	GSM278706		WT_females_non-beta-eliminated	4222563	647346	392494
SRR001340	GSM278575		IR_beta-eliminated	1853657	199573	26465
SRR001341	GSM278695		WT_males_non-beta-eliminated	1351544	647346	392494
SRR001342	GSM278574		WT_males_beta-eliminated	298515	13541	4856
SRR001343	GSM278696		dcr-2_non-beta-eliminated	885556	534300	409160
SRR001344	GSM278692		dcr-2_beta-eliminated	2140535	418951	286530
SRR001345	GSM278708		ago2_non-beta-eliminated	2184581	1728170	1384010
SRR001346	GSM278648		ago2_beta-eliminated	1011601	86718	27753
SRR001347	GSM278704		ago2_untreated	14483553	5047526	1006673
SRR001348	GSM278693		ago2_oxidized	14016602	2116162	220194
SRR001349	GSM278705		heterozygous_dcr-2_untreated	14931077	5619249	1080513
SRR001664	GSM278703		homozygous_dcr-2_untreated	10930368	4215061	1022030
SRR010951	SRX002202		Ago3 heterozygotes, oxidized	2265839	1964299	1544579
SRR010952	SRX002237		Ago3 trans-heterozygotes, oxidized	1078863	890776	733243
SRR010953	SRX002238		Aub heterozygotes, oxidized	9188840	7047908	4070652
SRR010954	SRX002239		Aub trans-heterozygotes, oxidized	9052476	6265357	3637769
SRR010955	SRX002240		Aub IP in Ago3 heterozygotes	3553573	2990540	2127367
SRR010956	SRX002241		Piwi IP in Ago3 heterozygotes	2918612	2463780	1800320
SRR010957	SRX002242		Aub IP in Ago3 trans-heterozygotes	3116534	2592066	2360533
SRR010958	SRX002243		Piwi IP in Ago3 trans-heterozygotes	3292380	2760514	1983124
SRR010959	SRX002244		Ago3 IP in heterozygotes	8666803	6772745	1650721
SRR010960	SRX002245		wt, oxidized	3302340	2865283	2198965
SRR014268	GSM327627		Embryo_0-2hrs_rep1_HAR_0_2hr_Emb	6927063	6384257	5260803
SRR014269	GSM327629		Embryo_0-2hrs_rep1_LK_0_2hr_Emb	6146366	5903008	4010614
SRR014270	GSM327628		Embryo_0-2hrs_rep1_NA_0_2hr_Emb	6068426	5834199	4304667
SRR014271	GSM327625		Embryo_0-2hrs_rep1_w1118_0_2hr_Emb	5448644	5181575	4225970
SRR014272	GSM327626		Embryo_0-2hrs_rep1_wK_0_2hr_Emb	5547458	5287063	3977344
SRR014273	GSM327622		Ovary_rep1_Har_P	6586691	6389303	5253789
SRR014274	GSM327633		Ovary_rep1_LK(fem)_x_Har(male)_F1	7005120	6539617	5086862
SRR014275	GSM327624		Ovary_rep1_LK_P	5651997	5365242	4018217
SRR014276	GSM327634		Ovary_rep1_NA(fem)_x_Har(male)_F1	7221656	6774385	5392317
SRR014277	GSM327623		Ovary_rep1_NA_P	5593578	5395553	4141163
SRR014278	GSM327632		Ovary_rep1_w1118(fem)_x_Har(male)_F1	7101946	6604806	4916642
SRR014279	GSM327630		Ovary_rep1_w1118(fem)_x_wK(male)_F1	4432889	4234394	3481427
SRR014280	GSM327620		Ovary_rep1_w1118_P	5347291	5101684	4400164
SRR014281	GSM327631		Ovary_rep1_wK(fem)_x_w1118(male)_F1	5404279	5175006	4463700
SRR014282	GSM327621		Ovary_rep1_wK_P	5068867	4793990	3678723
SRR023197	SRX007800		RNA Library from S2 control cells	1921735	1676002	1430899
SRR023399	SRX008034		RNA bound by P19 protein	2598974	2346369	2195070
SRR023400	SRX008031		total RNA extracted from P19 cells	2759854	2475583	2262358
SRR023402	SRX008036		total RNA extracted from NLS-P19 cells	3069717	2668178	2228551
SRR023407	SRX008041		RNA bound by NLS-P19 protein	3116534	2592066	2360533
SRR029028	GSM430030		untreated (mock)	7378534	7098206	3786734
SRR029029	GSM430031		dcr-1 knockdown	3978557	3609982	1670716
SRR029030	GSM430032		dcr-2 knockdown	2313250	2017033	999360
SRR029031	GSM430033		loqs-ORF knockdown	5995339	5699379	2897980
SRR029032	GSM430034		r2d2 knockdown	4652712	4133384	1939539
SRR029033	GSM430035		lacZ knockdown	3522598	3191461	1353448
SRR029633	SRX012520		total small RNAs from hen1 homozygous flies	13548608	10939779	3544134
SRR031692	GSM466487		Total small RNAs from Oregon R	14927216	11488407	2806473
SRR031693	GSM466488		2-O-methylated small RNAs from Oregon R	3366402	2055497	1623551
SRR031694	GSM466488		2-O-methylated small RNAs from Oregon R	1660144	976564	766449
SRR031696	GSM466489		Ago1-associated small RNAs from Oregon R	2504197	1541589	1266903
SRR031697	GSM466490		Total small RNAs from dcr-2 heterozygous flies	10372756	6984909	3736237
SRR031698	GSM466491		2-O-methylated small RNAs from dcr-2 heterozygous flies	7158491	4523031	2667078
SRR031699	GSM466492		Total small RNAs from dcr-2 homozygous flies	4694671	3267006	2165306
SRR031700	GSM466493		2-O-methylated small RNAs from dcr-2 homozygous flies	8723258	3730250	2321788
SRR031701	GSM466494		Total small RNAs from r2d2 heterozygous flies	17116691	12375523	2112076
SRR031702	GSM466495		2-O-methylated small RNAs from r2d2 heterozygous flies	13279537	10954156	976652
SRR031703	GSM466496		Total small RNAs from r2d2 homozygous flies	16076891	12377446	3412593
SRR031704	GSM466497		2-O-methylated small RNAs from r2d2 homozygous flies	11858909	7820248	1075866
SRR032092	GSM442732		mock oxidized	8229721	7154849	3705057
SRR032093	GSM442733		ago1 knockdown	3932740	3527699	1337137
SRR032094	GSM442734		ago2 knockdown	4771340	4329051	1453749
SRR032095	GSM442735		AGO1 IP dcr2 knockdown	6776236	6550319	5865576
SRR032096	GSM442736		AGO2 IP dcr2 knockdown	7527990	6734434	3743137
SRR032152	GSM466489		Ago1-associated small RNAs from Oregon R	9374372	6112914	4120236
V001	GSE24540	modENCODE_2971	IR-	4094638	3583460	2415080
V002	GSE24541	modENCODE_2972	IR+	3307057	2858611	1888328
V008	GSE24308	modENCODE_2722	S2 cell	10845232	8250614	2846756
V009	GSE24315	modENCODE_2820	CMEL1 cell	6777988	5534576	3721289
V010	GSE24298	modENCODE_2002	MLDmD20c5 cell	10141826	8188295	2110132
V011	GSE24299	modENCODE_2003	Sg4 cell	5844365	4803607	2510237
V018	GSM399100	modENCODE_2606	dmel_Kc167_rep1	7244636	6284851	4795363
V019	GSE24300	modENCODE_2004	GM2 cell	8661944	7459811	3582602
V020	GSM343832	modENCODE_2608	S2R+ (biological replicate 1)	7090629	5697000	3795326
V021	GSE24301	modENCODE_2005	ML-DmD21 cell	7175636	4939489	3321596
V024	GSM399101	modENCODE_2606	dmel_Kc167_rep2	7070280	5376939	3232627
V025	GSM343833	modENCODE_2608	S2R+ (biological replicate 2)	4948526	4502464	2980763
V026	GSE24302	modENCODE_2006	1182-4H cell	5708379	4499746	3053429
V028	GSE24307	modENCODE_2721	CMEW1 Cl.8+ cell	4753953	4314636	2235002
V033	GSE24307	modENCODE_2721	CMEW1 Cl.8+ cell	7641283	6805190	2895281
V063	GSE24310	modENCODE_2744	wt ovary AGO1-IP	9788733	8200760	4452265
V064	GSE24311	modENCODE_2746	ago2 ovary, AGO1-IP	9738979	8344654	5198053
V065	GSE24316	modENCODE_2833	dcr2 ovary, AGO1-IP	9203832	8120234	5248497
V066	GSE24313	modENCODE_2749	r2d2 ovary, AGO1-IP	8797210	7812012	5291111
V067	GSM371638	modENCODE_2375	small RNA from S2 cells (S2-NP)	11605849	9883259	4379969
V075	GSE24303	modENCODE_2007	ML-DmBG1-C1 mod115	23221328	20296791	1067461
V076	GSE24306	modENCODE_2719	ML-DmBG3-C2 mod121	18086818	15410495	5833459
V081	GSE24309	modENCODE_2743	2-6 hr mod217/223	18734682	15655566	10393112
V082	GSE24539	modENCODE_2742	14-24 hr mod253/259/265/277	17514455	15496813	12239759
V083	GSE24304	modENCODE_2008	1d male mod367	21195112	17685447	11907242
V084	GSE24305	modENCODE_2009	1d female mod373	21477538	17148515	11181625
V088	GSE24312	modENCODE_2748	r2d2[1] ovary total RNA	16941327	14560816	8430692
V089	GSE24317	modENCODE_2834	ago2[414] ovary total RNA	17920056	15018012	8704970
V090	GSE24314	modENCODE_2751	CS‚àö√á male total RNA	19354046	16504465	6850925
V097	GSE24545	modENCODE_2976	CS ovary	24419736	22651416	18223943
V098	GSE24544	modENCODE_2975	dcr-2[L811fsX] ovary	24364761	22710014	19300904
