# Supplementary material for: Computational and experimental identification of mirtrons inDrosophila melanogasterandCaenorhabditis elegans
Source: HighWire-hosted journal article supplement (doi:10.1101/gr.113050.110), 2010-12-22
Supplement: Table_S2_worm_mirtron_libraries.xlsx [file Table_S2_worm_mirtron_libraries.xlsx]

## Sheet: ce6
Table S2 C. elegans small RNA libraries analyzed in this study
	Library description	Raw reads	Total input reads	Mapped reads	Uniquely mapped
GSM139137	MIT/WI Bartel C.elegans 454 2006
GSM146128	wild type animals fed on sel-1 dsRNA producing bacteria
GSM297742	Embryo	0	2195420	1340257	1114721
GSM297743	L1	0	2158251	1355536	1290231
GSM297744	L2	0	2093815	1267634	1169663
GSM297745	L3	0	3978045	1923852	1721609
GSM297746	L4	0	3942404	1596204	1478335
GSM297747	Adult (A)	0	4302109	1094481	1011321
GSM297748	Dauer	0	4875793	393064	343717
GSM297749	Glp-4 mutant	0	3699576	2354627	2246164
GSM297750	Mixed stage	0	10964021	8262959	7356206
GSM297751	Adult (B)	0	3161932	1794858	1519252
GSM297752	Prg-1 mutant (B)	0	2728321	1781769	1472029
GSM297753	Fog-2 mutant	0	2649158	1452712	1257322
GSM297754	Adult (C)	0	2697924	1897781	1575758
GSM297755	Prg-1 mutant (C)	0	3640993	2587669	2093323
GSM297757	Input	0	3956608	1746494	1397669
GSM297758	PRG-1 co-IP (not included)
GSM336052	embryo hermaphrodites	14245761	8644260	3262631	2575374		Adapter: TCGTATGCCGTCTTCTGCTTG
GSM336055	mid-L1 hermaphrodites	10010527	7975431	3946823	3731815
GSM336056	mid-L2 hermaphrodites	10028735	8190161	4440312	4205122
GSM336058	mid-L3 hermaphrodites	9188435	7309744	3468814	3301697
GSM336059	mid-L4 hermaphrodites	8914678	7737726	4679970	4552879
GSM336060	young adult hermaphrodites	9278881	7744623	4656599	4545338
GSM336086	young adult males	11975452	9615901	5475618	4844876
GSM336572	young adult spe-9 hermaphrodites	9115038	6122490	3895126	3691763
GSM378784	total small RNAs from C. elegans	0	181291	116656	112358
GSM427297	two-to-four cell C. elegans embryos	0	1056934	671306	556734
GSM427301	one cell stage C. elegans embryos	0	1719727	919994	707274
GSM427332	post-gastrulation C. elegans embryos	0	8349816	2404685	2182480
GSM427344	older, fixed C. elegans embryos	0	4968037	3675727	3528250
GSM427345	living one cell C. elegans embryos	0	1813421	576527	453907
GSM427346	mixed C. elegans embryos	0	1824662	1026930	939876
GSM443998	cde1input	0	7321108	4887705	4175255
GSM443999	cde1IP (not included)
GSM444000	CDE1OLD	0	5880513	4827141	3910425
GSM444001	CDE1YNG	0	4884598	3965054	3534192
GSM444002	csr1input	0	5473108	3749331	3070474
GSM444003	csr1IP (not included)
GSM444004	N2OLD	0	6736961	5148068	4499628
GSM444005	N2YNG	0	12369979	9856236	8999681
GSM454000	small RNAs that co-immunopercepitate with the argonaute CSR-1 (not included)	3850599	3479521	1694778	1506263
GSM454001	small RNAs from wild type worms input control for the IP experiment	4992022	4561412	3301952	3059166
GSM454002	small RNAs from csr-1 mutant animals	5139346	4615737	3386791	2682421
GSM454003	small RNAs from ego-1 mutant animals	5064237	4136597	2823826	2171020
GSM454004	small RNAs from wild type control for csr-1(tm892) and ego-1(om97)	5903016	5160605	3548090	2989368
GSM455387	WT_CIPPNK_seq_s1	0	2565255	1188276	1026802
GSM455388	WT_CIPPNK_seq_s2	0	2610663	1520954	1317303
GSM455389	drh-3_CIPPNK_seq_s2	0	4188250	2229683	1828363
GSM455390	drh-3_CIPPNK_seq_s3	0	4266822	2645862	2176544
GSM455391	WT_Terminator_seq_CCM-s1	0	2064863	1313881	1121500		Clip GGG at the 5' end
GSM455392	WT_Terminator_seq_CCM-s2	0	4456583	2648067	2261139		Clip GGG at the 5' end
GSM455393	WT_Terminator_seq_JCC-s2	0	2775513	1430564	1223126		Clip GGG at the 5' end
GSM455394	glp-4_Terminator_seq_s3	0	3390430	1827518	1527346		Clip GGG at the 5' end
GSM455395	oocyte_TAP_seq_prb_s2	9568012	8114649	5523887	3363137
GSM455396	WAGO-1_IP_CIPPNK_seq_prb_s6	4992934	4487597	3350010	2687917
GSM455397	WAGO-1_input_CIPPNK_seq_prb_s7	5104857	4503626	3385554	2842503
GSM455398	mago12_CIPPNK_seq_prb_s3	5710306	3934073	3062208	2450724
GSM455399	mut7_CIPPNK_seq_prb_s8	5584098	4179118	3004903	2307691
GSM455400	rde-3_CIPPNK_seq_prb_s7	5708210	4177311	2993817	2294524
GSM455401	smg5_CIPPNK_seq_prb_s5	6802174	5091912	3749632	3073736
GSM455402	deb26_CIPPNK_seq_prb_s5	7741796	6375124	4430780	3367760
GSM455403	ekl-1_CIPPNK_seq_prb_s2	5529284	4289652	3034202	2223489
GSM455404	rde4_CIPPNK_seq_prb_s8	6160974	5505688	3844458	3287558
GSM459328	sperm (barcode: AGCG)	0	375821	239502	180646
GSM459329	rrf-3 male 1 (barcode: TATG)	0	1756562	1355582	1069880
GSM459330	control male 1 (barcode: GTTA)	0	1709935	1268047	1033549
GSM459331	rrf-3 male 2 (barcode: GTTA)	0	1492364	869422	671272
GSM459332	control male 2 (barcode: TATG)	0	755627	441035	364299
GSM464606	(WT_TAP_seq_prb_s5)	4635952	4013715	2801696	2453250
GSM464607	(beta_TAP_seq_prb_s3)	8026784	5532998	3155229	2755506
GSM464608	(beta_TAP_seq_prb_s4)	6889585	4414629	2969945	2604818
GSM464609	(ergo1_input_TAP_seq_prb_s4)	10468825	9078604	5604983	5288966
GSM464610	(ergo1_IP_TAP_seq_prb_s5)	11252075	8273289	4665692	4315612
GSM464611	(ergo1_CIPPNK_seq_prb_s3)	6547627	5462886	3660416	3005374
GSM464612	(rrf1_CIPPNK_seq_prb_s4)	9097422	6604146	3758401	3161795
GSM464613	(rrf3_CIPPNK_seq_prb_s6)	5374249	4470649	3151922	2603081
GSM465244	alg-3(tm1155);alg-4(ok1041);fog-2(q71) and fog-2(q71)	3523319	3247116	2538889	2263116
GSM465245	Wild type, fog-2(q71)	1066734	794556	653726	589119
GSM465246	Wild type, fog-2(q71)	3018573	2763963	2138292	1924476
GSM465247	small RNAs_spermatids_fem-3(q20)	15184410	10370783	3513085	2666673
GSM503820	N2_P-independent_1	0	887564	632459	515828
GSM503821	N2_P-independent_2	0	1663995	1120659	925278
GSM503822	N2_P-independent_3	0	7459214	5691644	4366794
GSM503823	rrf-3_P-independent_1	0	1595580	1132094	882989
GSM503824	rrf-3_P-independent_2	0	2345186	1583144	1312006
GSM503825	rrf-1_P-independent	0	1830619	1398461	1162899
GSM503826	rde-4_P-independent	0	396141	167197	135422
GSM503827	rde-1_P-independent	0	626861	182148	151787
GSM503828	eri-1_P-independent	0	1896860	1057192	624518
GSM503829	eri-9_P-independent	0	228885	155804	113008
GSM503830	ergo-1_P-independent	0	2481285	1832846	1144244
GSM503831	dcr-1_P-independent	0	2600398	2176965	1747817
GSM503832	glp-4_P-independent	0	852259	575664	527390
GSM503833	glp-1_P-independent	0	1690174	1391885	1122235
GSM503834	fem-1_P-independent	0	389636	284203	243270
GSM503835	N2_P-dependent	0	2491862	1687839	1538960
GSM503836	rrf-3_P-dependent	0	4013973	3177036	3008544
GSM503837	rrf-1_P-dependent	0	1167066	861948	792032
GSM503838	eri-1_P-dependent	0	2876792	2191991	1895890
GSM503839	eri-9_P-dependent	0	1586545	1387992	1249444
GSM503840	ergo-1_P-dependent	0	3359705	2961129	2711816
GSM503841	dcr-1_P-dependent	0	2661436	2296756	2220054
GSM503842	control_sperm_P-dependent	0	425438	260065	203142
GSM503843	rrf-3_sperm_P-dependent	0	650621	436341	181924
GSM518367	small RNA from HA::ALG-1 IP	0	139315	41914	41380
GSM518368	small RNA from a HA::ALG-2 IP	0	9220	5506	5464
GSM518369	small RNA from a HA::RDE-1 IP	0	100146	46453	41917
GSM518370	small RNA from rde-1 mutants (allele pk3301)	0	4528123	3772490	3413843
GSM518371	small RNA from N2 wild-type adults	0	6693577	5613030	5538769
GSM509582	dcr-1(-/-)WT	5273432	4265732	3847452	3585803		Adapter: TCGTATGCCGTCTTCTGCTTG
GSM509583	dcr-1(-/-)K39A_1	6099230	5494486	4993282	4756098
GSM509584	dcr-1(-/-)K39A_2	3492403	3052701	2578693	2465162
