# Supplementary material for: Computational and experimental identification of mirtrons inDrosophila melanogasterandCaenorhabditis elegans
Source: HighWire-hosted journal article supplement (doi:10.1101/gr.113050.110), 2010-12-22
Supplement: TableS4_worm_mirtron_prediction_miRBase.xlsx [file TableS4_worm_mirtron_prediction_miRBase.xlsx]

## Sheet: Introns_main_worm.txt
Table S4. C. elegans mirtron predictions. miRBase loci are highlighted blue; novel confident mirtrons in green, and candidate cloned mirtrons in yellow; note that mir-1020 was not previously annotated as a mirtron.
Loci	Intron name	Annotation	Intron length	Mirtron?	Score	Ranking	Intronic	Exonic	# of libraries
chrX 1879427-1879533 +	NM_075944_in1	cel-mir-1018	56	known miRBase	0.9522	1	1305	44	56
chrIII 3507163-3507269 -	NM_001027516_in6	cel-mir-4927	56	novel confident	0.9407	2	67	1	13
chrX 12692501-12692609 +	NM_077717_in3	cel-mir-62	58	known miRBase	0.9392	3	154395	82	93
chrV 9054624-9054734 -	NM_072945_in2		60		0.9301	4	1	0	1
chrI 6185056-6185171 +	NM_059381_in3	cel-mir-4816	65	novel confident	0.8865	5	4047	133	61
chrI 6054927-6055029 -	NM_059346_in2	cel-mir-4926	52	novel confident	0.8809	6	15	4	3
chrV 18632596-18632735 -	NM_075237_in12		89		0.8746	7	0	0	0
chrX 1873797-1873904 +	celmir_2220_in1	cel-mir-2220	58	known miRBase	0.817	8	622	0	55
chrX 1879531-1879640 +	NM_075944_in2	cel-mir-4925	59	novel confident	0.8068	9	56	3	17
chrX 1879609-1879718 +	NM_075944_in3	cel-mir-4923b	59	novel confident	0.7976	10	126	5	22
chrIV 10840809-10840913 -	NM_001136398_in10	cel-mir-4924	54	novel confident	0.7945	11	14	6	3
chrI 3612242-3612344 +	NM_058786_in1		52		0.7799	12	0	0	1
chrII 5939020-5939132 +	NM_062785_in6		62		0.7517	13	3	2	1
chrX 1879845-1879956 +	NM_075944_in5	cel-mir-4923a	61	novel confident	0.6805	14	132	3	32
chrIV 15932223-15932326 -	NM_070498_in2		53	candidate	0.6482	15	1	0	2
chrV 3304805-3304913 -	NM_071513_in8	cel-mir-4922-2	58	novel confident	0.5274	16	45	1	11
chrI 10972069-10972176 +	NM_001026614_in1		57		0.5268	17	0	0	1
chrX 6078337-6078440 +	NM_001029302_in7		53		0.4916	18	0	0	0
chrV 2741828-2741967 -	NM_071344_in3		89		0.4778	19	0	0	0
chrV 3380117-3380232 -	NM_071540_in10	cel-mir-4922-1	65	novel confident	0.444	20	46	1	11
chrX 11561828-11561995 +	NM_077531_in5		117		0.4412	21	6	1	2
chrV 18275307-18275425 -	NM_075175_in7		68	candidate	0.441	22	4	0	1
chrX 1587593-1587726 +	NM_075897_in6		83		0.4288	23	40	2	4
chrI 5995299-5995403 -	NM_059334_in4		54		0.3931	24	4	1	3
chrIII 997543-997677 +	NM_064910_in16		84		0.3833	25	2	1	7
chrV 9250941-9251044 +	NM_072995_in4		53		0.3654	26	0	0	0
chrIII 10047614-10047734 -	NM_066829_in24	cel-mir-1020	70	known miRBase	0.3532	27	1720	115	55
chrV 9538448-9538556 -	NM_073059_in1		58		0.3531	28	0	0	0
chrI 7624667-7624771 +	NM_059726_in19		54		0.3523	29	0	0	0
chrII 12469642-12469743 -	NM_064256_in1		51		0.3465	30	0	0	0
chrIII 2002222-2002383 +	NM_065088_in6		111		0.3361	31	3	0	4
chrIV 11208724-11208835 +	NM_069702_in8		61		0.3344	32	0	0	0
chrII 4764820-4764968 -	NM_062454_in2		98		0.3183	33	0	0	0
chrX 5852059-5852223 -	NM_076581_in1		114		0.317	34	0	0	1
chrV 13678010-13678110 -	NM_073985_in7		50		0.2774	35	0	0	0
chrIV 4443634-4443738 -	NM_068165_in4		54		0.2747	36	0	1	1
chrIII 7905656-7905798 -	NM_066318_in2		92		0.2734	37	1	9	1
chrIII 3490646-3490749 -	NM_065318_in2		53		0.2717	38	1	0	2
chrII 4190069-4190174 -	NM_062337_in5		55		0.2535	39	1	0	1
chrX 4779211-4779319 -	NM_076416_in5		58		0.2433	40	0	0	0
chrII 2474167-2474271 -	NM_061879_in1		54		0.2414	41	1	1	1
chrV 13850764-13850911 +	NM_074031_in2		97		0.2198	42	0	0	0
chrIII 4993856-4993965 -	NM_065658_in5		59		0.2019	43	1	1	1
chrI 9484991-9485115 +	NM_060115_in4		74		0.1971	44	0	0	0
chrV 7220747-7220851 -	NM_072429_in4		54		0.1929	45	0	0	0
chrII 5974627-5974749 -	NM_062792_in5		72		0.1921	46	0	0	0
chrV 3598764-3598875 -	NM_071611_in4		61		0.1832	47	1	0	1
chrI 8333520-8333625 +	NM_059864_in3		55		0.183	48	0	1	0
chrII 6594658-6594759 -	NM_001047289_in1		51		0.1763	49	0	1	0
chrII 9805753-9805900 -	NM_063714_in1		97		0.1763	50	1	0	1
chrI 13957676-13957779 +	NM_061035_in4		53		0.1592	51	4	1	2
chrIII 8615720-8615827 -	NM_066495_in3		57		0.1566	52	0	0	0
chrX 8413801-8413901 +	NM_001029366_in5		50		0.1537	53	3	5	1
chrII 5079308-5079409 -	NM_062536_in3		51		0.1461	54	0	0	0
chrI 2925638-2925739 +	NM_058674_in2		51		0.1441	55	0	0	0
chrII 6337114-6337217 -	NM_062873_in2		53		0.144	56	0	0	0
chrI 9891064-9891212 -	NM_060216_in9		98		0.1433	57	0	0	0
chrX 6461181-6461290 +	NM_076686_in14		59	candidate	0.1347	58	8	13	3
chrI 8527469-8527570 -	NM_059909_in3		51		0.1289	59	0	1	0
chrX 4604018-4604123 -	NM_001029733_in15		55		0.1283	60	0	1	0
chrIV 4766432-4766587 +	NM_068238_in3		105		0.1278	61	0	0	0
chrIV 9858689-9858819 +	NM_069370_in2		80		0.1264	62	0	1	0
chrX 5405053-5405163 -	NM_076519_in4		60		0.1255	63	0	1	0
chrIII 515363-515495 -	NM_171066_in4		82		0.1229	64	0	3	0
chrX 1873615-1873724 +	NM_075943_in2	cel-mir-4809	59	novel confident	0.1211	65	182	3	29
chrII 364647-364753 -	NM_061317_in4		56		0.1172	66	0	0	0
chrII 8200235-8200361 +	NM_063324_in6		76		0.1157	67	0	1	0
chrIV 3381951-3382051 -	NM_067933_in6		50		0.1143	68	1	0	3
chrII 1409216-1409336 -	NM_061567_in1		70		0.114	69	1	0	1
chrII 14392218-14392318 +	NM_001026946_in3		50		0.1118	70	5	3	11
chrX 1142863-1142964 -	NM_075817_in18		51		0.1117	71	0	1	0
chrIV 11228178-11228279 -	NM_069707_in6		51		0.1099	72	0	0	0
chrIV 9828416-9828519 +	NM_069356_in11		53		0.1091	73	0	0	0
chrI 12415236-12415346 +	NM_060747_in5		60		0.1085	74	0	2	0
chrI 10892805-10892964 -	NM_060438_in17		109		0.1079	75	0	0	0
chrI 12399702-12399812 -	NM_060742_in3		60		0.1073	76	0	3	0
chrV 12074826-12074927 -	NM_073626_in8		51		0.1069	77	0	1	0
chrII 13589482-13589597 -	NM_001027285_in2		65		0.1063	78	0	1	0
chrII 3035699-3035803 +	NM_062027_in8		54		0.1062	79	1	0	1
chrIII 4367033-4367147 +	NM_065478_in7		64		0.1062	80	0	2	0
chrV 11312380-11312485 +	NM_182373_in3		55		0.1017	81	0	0	0
chrII 11444439-11444546 +	NM_064038_in3		57		0.1003	82	0	1	0
chrIV 14760727-14760867 -	NM_070378_in4		90		0.0969	83	1	5	1
chrIII 4186569-4186669 -	NM_065436_in6		50		0.0958	84	0	2	0
chrIII 13336984-13337123 -	NM_067347_in1		89		0.0956	85	2	0	1
chrIII 8017921-8018037 -	NM_066346_in3		66		0.0952	86	0	0	0
chrII 5670296-5670401 -	NM_062709_in1		55		0.0944	87	0	1	0
chrX 3270580-3270683 -	NM_076159_in13		53		0.0937	88	0	0	0
chrII 411892-411993 +	NM_171847_in3		51		0.0932	89	3	2	1
chrX 16599670-16599770 +	NM_078284_in8		50		0.0905	90	0	0	0
chrIII 4073552-4073655 +	NM_065413_in9		53		0.0859	91	0	0	0
chrV 16507364-16507465 -	NM_074779_in2		51		0.0844	92	0	0	0
chrI 12277143-12277243 -	NM_060699_in1		50		0.0841	93	0	0	0
chrV 12867143-12867247 -	NM_073818_in4		54		0.0837	94	27	109	2
chrII 2483523-2483628 -	NM_061882_in1		55		0.0836	95	2	3	1
chrIV 3307244-3307344 -	NM_067916_in2		50		0.0827	96	1	0	1
chrIII 11023450-11023558 +	NM_001027717_in8		58		0.08	97	2	0	12
chrV 11539803-11539905 +	NM_073525_in8		52		0.0799	98	0	0	0
chrII 3908666-3908774 -	NM_062293_in1		58		0.0792	99	0	0	0
chrV 4908994-4909098 +	NM_071916_in1		54		0.0776	100	21	0	4
chrX 13996510-13996610 +	NM_077933_in2		50		0.0763	101	1	0	1
chrV 6477166-6477267 +	NM_001083282_in6		51		0.0757	102	0	0	0
chrII 1547480-1547623 -	NM_061592_in3		93		0.0753	103	1	2	1
chrX 10585247-10585348 -	NM_077373_in14		51		0.0746	104	0	2	0
chrV 14264172-14264299 +	NM_074129_in3		77		0.0743	105	0	0	0
chrIII 9302970-9303071 +	NM_066647_in5		51		0.0737	106	0	1	0
chrIII 4933063-4933165 +	NM_065643_in4		52		0.0732	107	0	1	0
chrIV 10678792-10678908 +	NM_001028110_in14		66		0.0723	108	0	2	0
chrV 4584890-4584991 +	NM_071839_in10		51		0.0713	109	0	0	0
chrII 5498769-5498869 +	NM_001136338_in1		50		0.0686	110	0	3	1
chrI 8991482-8991582 +	NM_060017_in3		50		0.0656	111	1	0	1
chrII 6720857-6720957 -	NM_062969_in2		50		0.0654	112	0	0	0
chrV 16255441-16255608 -	NM_074701_in6		117		0.0653	113	0	0	0
chrV 14900283-14900413 +	NM_074276_in3		80		0.0648	114	1	0	6
chrX 13332982-13333083 +	NM_077819_in5		51		0.0645	115	0	0	0
chrIV 16656879-16656989 +	NM_001047573_in2		60		0.0617	116	1	0	1
chrX 3615427-3615533 -	NM_076221_in5		56		0.0611	117	0	0	0
chrIV 5879843-5879955 -	NM_068480_in7		62		0.0603	118	0	0	0
chrI 13397894-13398043 +	NM_060957_in4		99		0.0593	119	0	2	0
chrII 14306005-14306127 -	NM_064578_in3		72		0.0578	120	0	0	0
chrII 14301772-14301894 -	NM_001027302_in3		72		0.0578	120	0	0	0
chrIV 8130969-8131078 +	NM_068958_in3		59		0.0571	122	0	1	0
chrIV 4859927-4860027 -	NM_068257_in2		50		0.0569	123	1	0	2
chrX 12243428-12243529 +	NM_077641_in8		51		0.0568	124	0	1	0
chrV 3970307-3970412 -	NM_001047606_in6		55		0.0559	125	0	0	0
chrII 14016380-14016529 -	NM_064538_in7		99		0.0553	126	2	1	2
chrIV 2894285-2894438 -	NM_067867_in1		103		0.0551	127	1	36	1
chrX 12125575-12125679 +	NM_077628_in1		54		0.0551	128	0	0	0
chrX 1879948-1880058 +	NM_075944_in6	cel-mir-4921	60	novel confident	0.0549	129	7	0	5
chrIII 9691713-9691827 -	NM_181940_in2		64		0.0545	130	0	0	1
chrIII 543117-543219 +	NM_064808_in2		52		0.0544	131	1	0	1
chrIV 9281515-9281631 +	NM_069219_in20		66		0.0526	132	1	0	1
chrIII 7765847-7765951 -	NM_066289_in6		54		0.0523	133	0	3	0
chrI 6083882-6083982 +	NM_059353_in9		50		0.0522	134	0	0	0
chrV 14740746-14740854 -	NM_074239_in5		58		0.052	135	1	0	1
chrII 12419409-12419509 -	NM_064236_in2		50		0.0519	136	0	0	0
chrIV 17377348-17377450 +	NM_070697_in3		52		0.0509	137	0	1	0
chrII 3506685-3506785 +	NM_062163_in4		50		0.0497	138	0	3	0
chrIV 9970313-9970417 +	NM_069393_in1		54		0.0488	139	1	0	1
chrI 12241455-12241559 +	NM_060688_in10		54		0.0481	140	0	0	0
chrIII 11783549-11783670 +	NM_067124_in4		71		0.0478	141	0	0	0
chrIV 10153019-10153119 +	NM_001047524_in2		50		0.0477	142	0	3	0
chrV 4248744-4248849 -	NM_071772_in2		55		0.0476	143	0	0	0
chrI 1894720-1894863 -	NM_058513_in6		93		0.047	144	0	2	0
chrV 14197159-14197307 +	NM_182360_in8		98		0.0467	145	2	1	1
chrIII 3780184-3780345 -	NM_065364_in8		111		0.0467	146	0	0	0
chrIV 8267410-8267512 -	NM_068986_in3		52		0.0464	147	0	0	0
chrV 2145574-2145684 -	NM_071178_in3		60		0.0464	148	3	0	1
chrI 9365999-9366119 -	NM_001026217_in6		70		0.046	149	1	3	1
chrX 9870075-9870176 +	NM_001136461_in2		51		0.0446	150	0	0	0
chrX 1017042-1017160 -	NM_075792_in6		68		0.0433	151	0	0	0
chrIV 2725729-2725830 -	NM_001028420_in6		51		0.0427	152	3	4	1
chrV 2855308-2855408 -	NM_071371_in4		50		0.0424	153	0	0	1
chrV 12696079-12696247 +	NM_001028878_in1		118		0.0423	154	19	33	2
chrIV 10664448-10664550 +	NM_069568_in1		52		0.0422	155	0	0	0
chrV 2202221-2202321 -	NM_071198_in1		50		0.0422	156	0	0	0
chrII 12434647-12434758 -	NM_064241_in2		61		0.0421	157	0	0	0
chrI 2450016-2450164 -	NM_058580_in4		98		0.0417	158	0	1	0
chrI 13950963-13951115 -	NM_061033_in9		102		0.0411	159	0	0	1
chrII 3388926-3389068 -	NM_062128_in3		92		0.0406	160	0	0	0
chrII 4854373-4854476 +	NM_062471_in5		53		0.0398	161	0	1	0
chrV 15224960-15225129 +	NM_074362_in2		119		0.0393	162	0	0	0
chrII 2359153-2359254 -	NM_061853_in2		51		0.0389	163	0	0	0
chrX 921355-921460 -	NM_075776_in2		55		0.0376	164	0	1	0
chrX 10859022-10859174 -	NM_077409_in17		102		0.0362	165	2	0	1
chrI 5113257-5113359 -	NM_059122_in4		52		0.0356	166	0	0	0
chrIV 5335117-5335217 +	NM_068382_in5		50		0.0348	167	1	3	1
chrII 1400658-1400772 +	NM_061562_in1		64		0.0347	168	0	0	0
chrIV 5537313-5537413 -	NM_068423_in7		50		0.0346	169	0	0	0
chrX 13459574-13459705 -	NM_077843_in11		81		0.0337	170	76	348	12
chrIII 8489970-8490074 -	NM_001027410_in4		54		0.0337	171	0	1	0
chrII 11119785-11119886 +	NM_063982_in7		51		0.0334	172	0	6	0
chrIV 7789246-7789347 -	NM_068885_in9		51		0.0322	173	0	5	1
chrII 8673627-8673729 -	NM_001026884_in10		52		0.0314	174	0	2	0
chrIV 11013642-11013743 -	NM_171417_in3		51		0.0314	175	0	0	1
chrIV 8592837-8592937 +	NM_001028373_in7		50		0.0313	176	0	0	0
chrIV 8433141-8433244 +	NM_069035_in1		53		0.0313	177	1	3	1
chrIV 16900765-16900887 -	NM_070601_in3		72		0.0312	178	0	2	0
chrII 4857940-4858082 +	NM_062473_in1		92		0.0306	179	0	1	2
chrV 16939846-16939946 +	NM_074883_in3		50		0.0298	180	12	28	3
chrV 17927147-17927248 +	NM_075112_in5		51		0.0287	181	0	1	0
chrX 14416391-14416492 -	NM_078000_in1		51		0.0284	182	0	0	0
chrI 13709813-13709920 +	NM_061000_in1		57		0.0282	183	1	0	1
chrV 6904383-6904486 -	NM_072352_in6		53		0.028	184	0	1	0
chrII 3760585-3760714 -	NM_062242_in1		79		0.0279	185	0	0	0
chrI 4951348-4951460 -	NM_001026252_in3		62		0.0279	186	1	1	1
chrV 17608416-17608521 +	NM_001029112_in2		55		0.0278	187	0	0	0
chrII 14616649-14616751 +	NM_064637_in2		52		0.0277	188	0	0	0
chrIV 7139213-7139318 -	NM_068719_in10		55		0.0275	189	1	5	1
chrX 12974091-12974199 -	NM_077754_in9		58		0.0272	190	0	0	0
chrIV 8740522-8740623 -	NM_069105_in1		51		0.027	191	2	1	1
chrII 1694977-1695090 -	NM_061645_in1		63		0.0268	192	0	0	0
chrI 7246552-7246666 -	NM_059647_in2		64		0.0268	193	0	1	0
chrII 12889862-12889962 +	NM_064338_in6		50		0.0268	194	0	0	1
chrV 1356169-1356286 +	NM_071004_in6		67		0.0268	195	0	1	0
chrX 2477151-2477253 -	NM_076049_in1		52		0.0264	196	0	0	0
chrIII 9303403-9303504 +	NM_066647_in7		51		0.0264	197	0	0	1
chrIV 9346181-9346282 -	NM_069246_in5		51		0.0258	198	1	5	1
chrIII 3814772-3814926 -	NM_065370_in2		104		0.0253	199	0	0	0
chrV 16098031-16098141 -	NM_074651_in1		60		0.025	200	0	0	0
chrIII 5881816-5881917 +	NM_065874_in6		51		0.025	201	24	0	4
chrIII 5110784-5110887 +	NM_171117_in3		53		0.0247	202	0	0	1
chrX 1702680-1702795 -	NM_075911_in8		65		0.0246	203	1	0	1
chrI 9629815-9629958 +	NM_001026439_in8		93		0.0245	204	0	1	0
chrV 7347317-7347417 +	NM_072472_in3		50		0.0244	205	0	0	0
chrV 4387117-4387241 -	NM_001038387_in1		74		0.0244	206	0	1	0
chrII 8882854-8882961 -	NM_063489_in13		57		0.0243	207	0	1	0
chrII 5873424-5873533 -	NM_062770_in9		59		0.0243	208	3	1	3
chrI 11223806-11223918 +	NR_024293_in1		62		0.0242	209	0	1	1
chrIII 5490765-5490895 +	NM_065771_in6		80		0.0242	210	0	0	0
chrII 14679290-14679446 +	NM_001027318_in3		106		0.0239	211	0	0	0
chrI 14897144-14897248 -	NM_061200_in13		54		0.0239	212	0	6	0
chrIV 5494830-5494957 +	NM_068420_in3		77		0.0236	213	0	0	0
chrIV 16494152-16494283 -	NM_070559_in2		81		0.0235	214	1	1	1
chrV 12593309-12593469 -	NM_073750_in2		110		0.0235	215	0	0	0
chrX 3269618-3269723 -	NM_076159_in9		55		0.0235	216	0	1	0
chrV 11062971-11063073 -	NM_001129525_in3		52		0.0233	217	0	0	0
chrIII 6247510-6247610 -	NM_065960_in10		50		0.0231	218	0	0	1
chrX 5498243-5498343 -	NM_171688_in5		50		0.023	219	0	1	0
chrI 14006012-14006124 +	NM_001047243_in5		62		0.0226	220	0	1	0
chrX 2936727-2936829 +	NM_076104_in9		52		0.0224	221	0	0	0
chrI 1040623-1040724 +	NM_001026571_in11		51		0.0221	222	0	1	0
chrIII 6855729-6855835 -	NM_066089_in10		56		0.0221	223	0	0	0
chrIV 10757443-10757543 -	NM_069593_in5		50		0.0219	224	1	15	1
chrI 3358365-3358467 +	NM_058746_in18		52		0.0218	225	0	0	0
chrII 10647710-10647811 +	NM_063896_in2		51		0.0217	226	1	0	1
chrIII 8894163-8894265 +	NM_066563_in1		52		0.0216	227	0	4	0
chrIII 9549215-9549338 +	NM_171221_in5		73		0.0216	228	1	4	1
chrV 10067305-10067425 +	NM_073182_in2		70		0.0216	229	0	0	0
chrV 415998-416109 -	NM_001029144_in1		61		0.0214	230	0	3	0
chrII 6293194-6293354 -	NM_001047283_in4		110		0.0214	231	118	72	6
chrIV 13141985-13142139 -	NM_070128_in3		104		0.0213	232	0	1	0
chrII 11495668-11495768 +	NM_064056_in1		50		0.0211	233	0	0	0
chrV 8971325-8971431 -	NM_072915_in2		56		0.0205	234	0	0	0
chrV 11522404-11522506 +	NM_073524_in4		52		0.0204	235	1	0	4
chrV 3035943-3036049 -	NM_071428_in3		56		0.0204	236	0	0	0
chrIV 11171920-11172067 +	NM_069693_in3		97		0.0203	237	0	0	0
chrII 2696986-2697086 -	NM_061934_in1		50		0.0203	238	0	0	0
chrI 462151-462257 +	NM_058333_in1		56		0.0201	239	3	0	3
chrI 6248235-6248340 +	NM_059401_in24		55		0.0197	240	0	0	0
chrX 6814781-6814884 +	NM_076744_in11		53		0.0196	241	0	0	0
chrV 8855877-8855977 -	NM_072880_in1		50		0.0195	243	0	9	0
chrV 8813783-8813883 -	NM_072866_in9		50		0.0195	243	0	9	0
chrII 12395996-12396097 -	NM_001027042_in2		51		0.0194	244	2	0	2
chrI 7846600-7846700 +	NM_001128995_in3		50		0.0193	245	1	6	1
chrIV 11563531-11563631 -	NM_069777_in2		50		0.0191	246	0	1	0
chrV 12638871-12638984 -	NM_073759_in1		63		0.0188	247	0	0	0
chrIII 3189220-3189320 +	NM_001129243_in6		50		0.0188	248	0	3	1
chrIII 9384231-9384332 -	NM_066662_in1		51		0.0187	249	0	1	0
chrI 13274901-13275015 +	NM_060932_in3		64		0.0187	250	56	18	4
chrII 944689-944792 +	NM_061458_in4		53		0.0186	251	0	0	0
chrV 7185159-7185264 +	NM_072422_in2		55		0.0185	252	0	1	0
chrIII 5000864-5001023 +	NM_065659_in7		109		0.0183	253	0	1	0
chrIII 2505829-2505940 -	NM_065169_in4		61		0.0181	254	0	0	0
chrIV 7213912-7214053 +	NM_068740_in1		91		0.0181	255	0	1	0
chrIII 13307522-13307636 +	NM_067342_in1		64		0.0178	256	0	1	2
chrV 16676145-16676256 +	NM_074820_in2		61		0.0175	257	29	0	13
chrIII 4093841-4093949 -	NM_065420_in1		58		0.0173	258	1	6	1
chrII 11389808-11389928 -	NM_001026836_in7		70		0.0173	259	0	0	0
chrV 4175222-4175326 -	NM_071760_in9		54		0.017	260	0	0	0
chrI 3838873-3839002 -	NM_058836_in2		79		0.0167	261	0	3	0
chrV 12150168-12150303 -	NM_073646_in18		85		0.0166	262	0	0	2
chrV 9721337-9721446 -	NM_073105_in5		59		0.0166	263	0	0	0
chrX 13598435-13598574 +	NM_077876_in1		89		0.0166	264	1	1	2
chrV 15691200-15691332 +	NM_074501_in3		82		0.0165	265	0	0	2
chrII 2752473-2752573 -	NM_061948_in4		50		0.0162	266	0	0	0
chrX 14280733-14280837 -	NM_077980_in5		54		0.0161	267	0	0	0
chrIV 1466188-1466293 -	NM_001028411_in5		55		0.0161	268	0	0	1
chrIV 389478-389585 -	NM_067516_in1		57		0.016	269	1	0	1
chrV 5837930-5838030 -	NM_072125_in2		50		0.0158	270	0	0	0
chrIII 9869358-9869492 -	NM_181983_in3		84		0.0156	271	0	0	0
chrV 7233941-7234048 -	NM_072437_in3		57		0.0156	272	0	0	0
chrX 11702916-11703018 +	NM_077557_in2		52		0.0154	273	0	0	0
chrI 12714434-12714534 -	NM_060822_in8		50		0.0154	274	0	0	2
chrIV 666119-666273 +	NM_067565_in2		104		0.0151	275	1	0	2
chrII 14441545-14441660 +	NM_064602_in2		65		0.0151	276	0	2	0
chrIV 11044331-11044437 +	NM_001047478_in18		56		0.0151	277	0	0	0
chrI 11361213-11361322 -	NM_001026339_in1		59		0.0151	278	0	2	1
chrV 16345196-16345299 -	NM_001029036_in2		53		0.0149	279	0	0	0
chrV 3766010-3766113 +	NM_071640_in12		53		0.0149	280	0	0	0
chrIII 8141920-8142020 -	NM_066376_in5		50		0.0148	281	0	2	0
chrII 2148400-2148529 +	NM_061797_in3		79		0.0147	282	14	17	4
chrI 5273480-5273582 -	NM_059154_in2		52		0.0146	283	0	0	0
chrII 10615772-10615876 +	NM_001026778_in6		54		0.0146	284	0	0	0
chrII 9174999-9175112 -	NM_063557_in5		63		0.0146	285	0	1	0
chrX 13731320-13731443 +	NM_077896_in12		73		0.0145	286	0	0	0
chrX 15196601-15196706 -	NM_078125_in3		55		0.014	287	0	0	0
chrV 6500997-6501099 +	NM_072249_in3		52		0.0139	288	0	2	0
chrIV 11275839-11275944 +	NM_069717_in4		55		0.0138	289	0	0	0
chrV 14449781-14449883 +	NM_074180_in1		52		0.0138	290	1	1	1
chrV 7088512-7088612 +	NM_072396_in6		50		0.0138	291	0	0	0
chrX 4672697-4672803 +	NM_076398_in13		56		0.0137	292	1	1	1
chrIV 6825066-6825177 +	NM_001028091_in2		61		0.0136	293	0	0	0
chrIV 2608777-2608879 +	NM_067831_in4		52		0.0134	294	1	0	1
chrIV 1093678-1093790 -	NM_067634_in7		62		0.0134	295	0	3	0
chrI 3558138-3558251 -	NM_001026593_in2		63		0.0132	296	0	0	0
chrX 2421429-2421535 -	NM_001029718_in2		56		0.0132	297	0	3	0
chrX 781514-781621 -	NM_075754_in4		57		0.0131	298	0	0	0
chrI 9474758-9474868 -	NM_060113_in4		60		0.0129	299	0	2	0
chrII 5358903-5359004 +	NM_062602_in2		51		0.0129	300	0	0	0
chrX 8294966-8295099 +	NM_077000_in1		83		0.0129	301	1	0	1
chrII 10444201-10444304 +	NM_063843_in2		53		0.0129	302	0	0	0
chrIII 4229374-4229544 +	NM_065447_in2		120		0.0129	303	0	0	0
chrX 7031910-7032011 -	NM_076786_in4		51		0.0126	304	0	0	0
chrII 6607901-6608001 -	NM_062942_in11		50		0.0125	305	0	0	0
chrX 5644475-5644636 -	NM_076549_in6		111		0.0125	306	1	0	1
chrX 11413074-11413174 -	NM_077511_in7		50		0.0125	307	0	0	0
chrIV 8342711-8342824 +	NM_069010_in1		63		0.0124	308	0	0	0
chrI 8324307-8324408 +	NM_001026308_in1		51		0.0124	309	0	0	0
chrX 9349481-9349595 -	NM_077173_in1		64		0.0123	310	0	1	0
chrIV 4813074-4813201 +	NM_068250_in4		77		0.0122	311	0	0	1
chrIII 1882749-1882858 -	NM_065069_in2		59		0.0121	312	1	2	1
chrIV 4354601-4354708 -	NM_068147_in4		57		0.0119	313	3	1	1
chrIV 4349743-4349850 +	NM_068146_in4		57		0.0119	314	3	1	1
chrII 2345219-2345334 +	NM_061847_in1		65		0.0118	315	0	0	0
chrV 8562630-8562730 +	NM_072806_in6		50		0.0118	316	0	0	0
chrX 1028484-1028612 -	NM_075795_in2		78		0.0117	317	0	0	0
chrII 8158323-8158426 +	NM_063310_in1		53		0.0116	318	0	0	0
chrIII 8715427-8715531 -	NM_066521_in4		54		0.0116	319	0	0	0
chrX 7710357-7710516 -	NM_076901_in1		109		0.0116	320	0	0	0
chrX 9910091-9910245 -	NM_077262_in5		104		0.0115	321	0	0	0
chrII 8978927-8979036 -	NM_063512_in1		59		0.0114	322	17	21	3
chrX 7494773-7494875 -	NM_076866_in5		52		0.0114	323	0	1	0
chrIV 9293390-9293501 -	NM_069221_in6		61		0.0112	324	0	0	0
chrIV 9285897-9286008 -	NM_069220_in5		61		0.0112	324	0	0	0
chrX 1841768-1841870 -	NM_075938_in2		52		0.0112	326	1	0	1
chrII 8930280-8930383 +	NM_063498_in1		53		0.0111	327	0	0	0
chrII 6925461-6925561 -	NM_063020_in7		50		0.0111	328	0	0	0
chrIII 4477218-4477366 -	NM_065510_in1		98		0.011	329	1	0	1
chrX 2234394-2234496 +	NM_076010_in2		52		0.0109	330	0	0	0
chrI 5704984-5705149 +	NM_059265_in9		115		0.0109	331	0	0	0
chrII 14174946-14175057 -	NM_064559_in5		61		0.0108	332	3	3	1
chrX 14105341-14105446 +	NM_077948_in9		55		0.0107	333	1	0	1
chrIII 5467296-5467398 +	NM_065764_in5		52		0.0106	334	0	2	0
chrV 12692189-12692291 +	NM_073767_in6		52		0.0106	335	46	146	5
chrIV 8791775-8791876 -	NM_001027871_in2		51		0.0105	336	0	0	0
chrIII 11823556-11823696 +	NM_067131_in1		90		0.0105	337	0	3	0
chrIII 3554978-3555084 +	NM_065329_in4		56		0.0105	338	0	0	0
chrIV 7150759-7150887 -	NM_068722_in1		78		0.0104	339	0	0	0
chrI 206566-206717 +	NM_058292_in5		101		0.0104	340	1	0	3
chrIII 8407840-8407940 +	NM_066457_in8		50		0.0104	341	0	0	0
chrX 5165842-5165949 +	NM_076476_in3		57		0.0104	342	0	0	0
chrV 14038067-14038167 -	NM_001047699_in8		50		0.0103	343	0	0	0
chrV 2294990-2295092 +	NM_071229_in1		52		0.0102	344	0	1	1
chrV 4057528-4057637 -	NM_071732_in4		59		0.0102	345	0	0	0
chrX 84135-84242 -	NM_075673_in1		57		0.0102	346	0	0	1
chrV 1604470-1604571 -	NM_071053_in2		51		0.0102	347	1	0	1
chrI 5343785-5343936 -	NM_059171_in6		101		0.0102	348	0	0	0
chrV 15923629-15923729 -	NM_074586_in3		50		0.0101	349	0	0	0
chrI 5673191-5673291 -	NM_059259_in7		50		0.0101	350	0	0	0
chrIII 6901223-6901338 -	NM_066101_in2		65		0.0101	351	0	0	1
chrV 1263579-1263682 -	NM_070996_in3		53		0.0101	352	1	7	1
chrIII 10045250-10045351 -	NM_066829_in17		51		0.01	353	0	1	0
chrV 19408990-19409113 -	NM_075376_in3		73		0.01	354	0	0	0
chrI 6903537-6903673 -	NM_001025882_in9		86		0.01	355	0	2	0
chrIII 10243328-10243490 +	NM_066866_in10		112		0.0099	356	0	0	0
chrIV 1029778-1029885 -	NM_067626_in4		57		0.0098	357	0	0	0
chrII 13876109-13876212 +	NM_064508_in2		53		0.0097	358	0	1	0
chrV 3423550-3423655 -	NM_071558_in2		55		0.0095	359	0	0	1
chrIV 9782893-9782993 -	NM_069345_in7		50		0.0095	360	0	4	0
chrIV 11109449-11109551 -	NM_069675_in4		52		0.0094	361	0	1	0
chrIII 398829-398929 -	NM_064794_in1		50		0.0093	362	1	3	1
chrII 14813846-14813963 +	NM_064670_in4		67		0.0093	363	0	1	0
chrV 5967660-5967762 +	NM_001028467_in4		52		0.0092	364	0	0	0
chrII 702515-702618 +	NM_061395_in3		53		0.0092	365	0	0	0
chrX 4952001-4952101 +	NM_001029633_in2		50		0.0091	366	1	1	1
chrX 14870439-14870544 -	NM_078068_in2		55		0.0091	367	0	0	1
chrIV 11781131-11781231 +	NM_069830_in9		50		0.009	368	0	0	0
chrII 9524769-9524872 +	NM_063642_in2		53		0.0089	369	1	1	1
chrV 4896166-4896281 +	NM_071911_in1		65		0.0089	370	0	0	0
chrII 14007859-14007963 +	NM_064535_in4		54		0.0089	371	0	2	0
chrI 8891051-8891175 +	NM_059996_in46		74		0.0089	372	0	0	0
chrIII 6197264-6197398 -	NM_171872_in5		84		0.0089	373	1	0	1
chrV 7700956-7701057 -	NM_072593_in1		51		0.0089	374	0	1	0
chrV 15966519-15966624 -	NM_074601_in2		55		0.0088	375	0	0	0
chrV 426020-426121 +	NM_070796_in7		51		0.0088	376	5	1	2
chrIII 6251058-6251159 +	NM_065961_in4		51		0.0087	377	0	3	0
chrIV 8702363-8702475 +	NM_171406_in11		62		0.0086	378	0	0	0
chrII 9431418-9431522 -	NM_171029_in1		54		0.0086	379	0	0	0
chrI 5927502-5927622 +	NM_059311_in14		70		0.0085	380	0	0	0
chrV 19082284-19082439 -	NM_001029058_in8		105		0.0085	381	0	0	0
chrI 1592271-1592373 +	NM_058466_in6		52		0.0085	382	0	0	1
chrIV 4003932-4004036 +	NM_068057_in12		54		0.0085	383	0	0	0
chrI 12157924-12158026 +	NM_060672_in3		52		0.0085	384	0	0	0
chrII 1098658-1098758 -	NM_061510_in2		50		0.0084	385	0	2	0
chrX 5842192-5842294 +	NM_076579_in3		52		0.0083	386	0	0	0
chrIII 11361715-11361825 +	NM_067060_in2		60		0.0083	387	0	1	0
chrII 15089012-15089142 +	NM_064704_in11		80		0.0082	388	0	0	0
chrIII 6241785-6241893 -	NM_065958_in1		58		0.0082	389	4	2	2
chrI 9126821-9126923 -	NM_060047_in2		52		0.0082	390	2	10	1
chrII 6898691-6898791 +	NM_063010_in1		50		0.0082	391	0	1	0
chrIV 866605-866708 +	NM_067602_in15		53		0.0081	392	0	2	0
chrV 4921217-4921324 +	NM_071921_in1		57		0.0081	393	0	0	0
chrIV 2988443-2988561 -	NM_001028328_in3		68		0.0079	394	0	0	0
chrI 14711197-14711303 +	NM_061154_in1		56		0.0079	395	0	1	1
chrII 8388838-8388941 +	NM_063362_in4		53		0.0079	396	2	2	1
chrI 6209446-6209560 -	NM_059389_in4		64		0.0078	397	0	0	0
chrI 5089430-5089590 +	NM_170854_in6		110		0.0078	398	0	0	0
chrIV 12644871-12644972 +	NM_001136375_in11		51		0.0078	399	0	1	0
chrV 2452032-2452151 -	NM_071271_in6		69		0.0078	401	23	2	13
chrV 2560311-2560430 -	NM_071298_in6		69		0.0078	401	23	2	13
chrIII 4300629-4300729 -	NM_065462_in5		50		0.0078	402	1	1	1
chrII 14529004-14529109 +	NM_064619_in3		55		0.0078	403	1	1	1
chrX 5255187-5255298 +	NM_076490_in1		61		0.0077	404	0	2	0
chrI 10908380-10908480 -	NM_060442_in4		50		0.0077	405	0	0	0
chrI 3782854-3782954 +	NM_058816_in3		50		0.0077	406	0	1	0
chrX 2554267-2554377 +	NM_076060_in1		60		0.0077	407	2	0	5
chrII 819697-819808 -	NM_061419_in3		61		0.0076	408	0	0	0
chrIII 9318912-9319013 +	NM_066649_in6		51		0.0076	409	0	0	0
chrV 2527831-2527931 +	NM_071262_in2		50		0.0075	410	0	1	0
chrI 6735737-6735848 -	NM_059528_in3		61		0.0074	411	0	1	0
chrX 182706-182809 +	NM_075659_in1		53		0.0074	412	0	1	2
chrI 4830232-4830335 +	NM_059058_in1		53		0.0074	413	0	2	0
chrV 11408480-11408585 +	NM_073493_in2		55		0.0074	414	0	0	0
chrIII 4639448-4639556 +	NM_065546_in4		58		0.0074	415	0	1	0
chrII 13482361-13482465 +	NM_064435_in1		54		0.0073	416	0	0	0
chrX 12358865-12358988 -	NM_182449_in1		73		0.0071	417	19	0	6
chrII 8244299-8244400 -	NM_063335_in1		51		0.0071	418	0	1	0
chrII 13643360-13643463 +	NM_064468_in3		53		0.0071	419	1	5	1
chrV 12094365-12094474 +	NM_073633_in1		59		0.0071	420	0	0	0
chrV 17081829-17081929 -	NM_001129532_in4		50		0.007	421	0	0	0
chrI 7577814-7577939 +	NM_001025906_in4		75		0.007	422	0	1	0
chrII 5416935-5417035 +	NM_062625_in1		50		0.007	423	2	0	1
chrX 17029039-17029140 -	NM_182452_in10		51		0.007	424	0	1	0
chrV 1797138-1797279 +	NM_071104_in6		91		0.007	425	0	0	0
chrIII 5711739-5711840 +	NM_065833_in2		51		0.0069	426	2	0	1
chrIII 6696747-6696874 +	NM_066066_in2		77		0.0069	427	4	4	1
chrI 9966941-9967055 +	NM_060234_in2		64		0.0068	428	0	1	0
chrV 5896263-5896367 +	NM_072134_in2		54		0.0068	429	0	0	0
chrII 9286822-9286989 +	NM_063577_in4		117		0.0068	430	0	0	0
chrIV 8487736-8487894 +	NM_069047_in1		108		0.0068	431	0	0	0
chrV 5103867-5103989 -	NM_071966_in4		72		0.0068	432	1	0	3
chrV 4837931-4838037 -	NM_171927_in4		56		0.0068	433	0	1	0
chrII 3617892-3617998 +	NM_062195_in1		56		0.0067	434	0	0	0
chrV 2578679-2578780 +	NM_071305_in2		51		0.0067	435	0	1	0
chrIII 10624333-10624436 +	NM_066941_in7		53		0.0067	436	0	0	5
chrV 15028058-15028215 -	NM_001129446_in10		107		0.0067	437	0	0	0
chrI 12418523-12418623 +	NM_060748_in6		50		0.0067	438	0	0	0
chrX 3383249-3383350 -	NM_076184_in1		51		0.0067	439	0	0	0
chrI 6149715-6149825 +	NM_001129014_in2		60		0.0066	440	2	1	2
chrX 5520984-5521084 -	NM_076536_in2		50		0.0065	441	1	0	1
chrIII 10043734-10043856 -	NM_066829_in11		72		0.0065	442	0	1	0
chrIII 12398755-12398861 +	NM_067216_in11		56		0.0065	443	23	34	3
chrI 4117795-4117896 +	NM_058897_in4		51		0.0064	444	0	0	0
chrIV 1935458-1935566 +	NM_067744_in11		58		0.0064	445	1	2	1
chrIV 8133372-8133478 -	NM_068959_in3	cel-mir-4920	56	novel confident	0.0064	446	384	0	35
chrV 8732391-8732491 +	NM_072847_in13		50		0.0064	447	0	0	0
chrV 12654187-12654288 +	NM_073761_in6		51		0.0064	448	0	0	0
chrX 13267711-13267814 -	NM_077803_in1		53		0.0064	449	0	0	0
chrI 8889457-8889588 +	NM_059996_in40		81		0.0064	450	0	1	0
chrIII 10340866-10340973 -	NM_066885_in2		57		0.0063	451	0	0	0
chrI 3059449-3059555 +	NM_058696_in1		56		0.0063	452	0	1	0
chrV 18533967-18534135 +	NM_075224_in1		118		0.0062	453	0	1	2
chrIV 3453729-3453856 +	NM_067949_in1		77		0.0062	454	0	0	0
chrX 14474991-14475096 +	NM_078007_in5		55		0.0062	455	0	0	0
chrIV 11940344-11940444 +	NM_001047602_in6		50		0.0062	456	1	0	1
chrII 6738192-6738297 +	NM_062974_in4		55		0.0061	457	0	1	0
chrIII 5874924-5875025 -	NM_001026069_in1		51		0.0061	458	0	40	0
chrX 4258910-4259010 +	NM_076327_in7		50		0.0061	459	0	0	0
chrX 1548153-1548254 +	NM_075892_in5		51		0.0061	460	0	0	0
chrX 14970710-14970810 +	NM_078084_in1		50		0.0061	461	1	1	1
chrIV 8447644-8447790 +	NM_069036_in2		96		0.006	462	0	0	0
chrV 19444672-19444840 -	NM_075382_in3		118		0.006	463	0	1	1
chrV 6442417-6442542 +	NM_072240_in1		75		0.006	464	0	0	0
chrIII 1109169-1109330 +	NM_064933_in8		111		0.0059	465	3	0	8
chrIII 995599-995731 +	NM_064910_in12		82		0.0058	466	0	0	1
chrX 10032224-10032325 +	NM_077282_in6		51		0.0058	467	0	0	0
chrIII 1495644-1495789 -	NM_001027520_in1		95		0.0058	468	14	1	11
chrIV 10933861-10933999 +	NM_069633_in3		88		0.0058	469	12	1	1
chrIV 10941029-10941129 +	NM_069636_in1		50		0.0058	470	0	4	0
chrX 5946204-5946308 -	NM_076593_in1		54		0.0058	471	0	0	0
chrX 4674846-4674948 +	NM_076399_in2		52		0.0058	472	0	1	0
chrX 8431036-8431144 +	NM_077030_in5		58		0.0058	473	2	0	1
chrX 803737-803877 +	NM_075756_in6		90		0.0057	474	0	0	0
chrV 6563490-6563626 +	NM_072267_in4		86		0.0057	475	0	0	0
chrX 16817684-16817789 -	NM_001029484_in1		55		0.0057	476	0	0	0
chrIV 6557325-6557426 +	NM_068598_in1		51		0.0057	477	0	0	1
chrIV 9541433-9541602 +	NM_001028065_in3		119		0.0056	478	0	0	0
chrX 664889-665053 -	NM_075736_in1		114		0.0056	479	0	0	2
chrV 9988211-9988337 -	NM_171525_in1		76		0.0056	480	0	1	0
chrII 1735699-1735801 -	NM_061661_in7		52		0.0056	481	0	0	0
chrII 9584703-9584822 -	NM_063658_in1		69		0.0055	482	0	1	0
chrII 154032-154132 +	NM_061270_in3		50		0.0055	483	0	0	0
chrIV 6107941-6108048 +	NM_001028107_in8		57		0.0055	484	0	1	1
chrI 10017434-10017541 +	NM_060245_in5		57		0.0054	485	2	0	5
chrV 1361139-1361243 -	NM_071005_in10		54		0.0054	486	0	0	0
chrI 6969738-6969873 -	NM_059585_in7		85		0.0054	487	0	0	0
chrI 541263-541371 +	NM_170794_in9		58		0.0054	488	0	5	2
chrIII 4155416-4155516 -	NM_065427_in1		50		0.0054	489	0	0	0
chrIV 8342944-8343054 +	NM_069010_in2		60		0.0053	490	0	0	0
chrII 3722657-3722807 +	NM_062228_in6		100		0.0053	491	0	0	0
chrIII 2006997-2007122 +	NM_065089_in2		75		0.0053	492	0	0	1
chrIV 8690433-8690543 -	NM_069090_in7		60		0.0053	493	0	0	0
chrX 15849965-15850107 +	NM_078205_in1		92		0.0052	494	2	1	2
chrIII 6373401-6373517 +	NM_065991_in13		66		0.0052	495	0	0	0
chrV 8097259-8097361 -	NM_072689_in2		52		0.0052	496	1	0	1
chrV 20684344-20684447 -	NM_075595_in1		53		0.0052	497	1	1	1
chrX 14819998-14820139 -	NM_078059_in1		91		0.0051	498	1	3	1
chrIV 47703-47815 -	NM_067457_in1		62		0.005	499	1	0	2
chrIII 7985823-7985976 +	NM_066339_in13		103		0.005	500	7	6	1
chrIV 5264244-5264366 -	NM_068361_in6		72		0.005	501	0	1	0
chrI 6946670-6946778 -	NM_001047218_in2		58		0.005	502	0	1	0
chrIII 11286389-11286504 -	NM_067051_in1		65		0.005	503	2	3	3
chrIII 5206553-5206654 -	NM_065703_in6		51		0.0049	504	1	0	1
chrV 20544326-20544459 -	NM_075561_in5		83		0.0049	505	0	0	0
chrIII 1419226-1419345 +	NM_001027795_in1		69		0.0049	506	5	0	1
chrIII 6033965-6034067 -	NM_001027823_in1		52		0.0049	507	0	0	0
chrV 7821059-7821160 +	NM_072615_in2		51		0.0049	508	0	0	0
chrIV 8689335-8689445 -	NM_069090_in3		60		0.0049	509	0	0	0
chrIV 12880844-12880948 -	NM_070053_in2		54		0.0049	510	0	0	0
chrIV 10988827-10988930 +	NM_069647_in4		53		0.0049	511	0	0	3
chrII 6238486-6238589 -	NM_062845_in6		53		0.0049	512	0	0	0
chrIII 2855051-2855153 -	NM_065229_in9		52		0.0048	513	0	0	0
chrIV 13836157-13836276 -	NM_070264_in9		69		0.0048	514	0	2	0
chrIV 8106007-8106146 -	NM_068951_in3		89		0.0047	515	0	1	0
chrV 18678321-18678423 +	NM_001029109_in9		52		0.0047	516	0	0	0
chrII 286665-286791 +	NM_061293_in1		76		0.0047	517	0	2	0
chrV 17160879-17160995 +	NM_074939_in3		66		0.0047	518	0	2	0
chrX 14480580-14480680 +	NM_078008_in1		50		0.0046	519	0	2	0
chrII 682842-682942 +	NM_061389_in1		50		0.0046	520	0	0	0
chrX 7658639-7658744 -	NM_076892_in2		55		0.0046	521	1	3	1
chrIV 4617271-4617403 -	NM_171323_in6		82		0.0046	522	0	0	0
chrV 11563785-11563903 +	NM_001028725_in4		68		0.0046	523	0	2	0
chrX 5275625-5275764 +	NM_076494_in1		89		0.0046	524	0	0	0
chrI 10265114-10265215 -	NM_060297_in3		51		0.0045	525	0	6	0
chrII 4619065-4619173 -	NM_062414_in1		58		0.0045	526	0	2	0
chrV 1554-1715 +	NM_001129611_in1		111		0.0045	527	0	0	0
chrV 5198089-5198255 -	NM_071993_in5		116		0.0044	528	271	79	15
chrX 1173237-1173381 +	NM_075820_in18		94		0.0044	529	0	0	0
chrII 14310238-14310348 -	NM_171051_in3		60		0.0044	530	0	1	0
chrV 15701156-15701261 -	NM_171556_in2		55		0.0043	531	3	0	1
chrIII 8674568-8674671 -	NM_066510_in5		53		0.0043	532	0	0	0
chrV 6142120-6142220 +	NM_001028618_in3		50		0.0043	533	0	0	0
chrIV 971220-971331 +	NM_067617_in10		61		0.0043	534	2	2	1
chrII 11693588-11693689 -	NM_001026863_in4		51		0.0043	535	0	1	0
chrIII 2971863-2971972 -	NM_065246_in2		59		0.0043	536	15	7	3
chrV 10645142-10645243 -	NM_073325_in1		51		0.0043	537	0	1	0
chrIV 13779938-13780051 +	NM_001047571_in5		63		0.0043	538	0	1	0
chrI 3605533-3605639 -	NM_058783_in5		56		0.0042	539	0	0	0
chrIV 461689-461793 -	NM_001028147_in1		54		0.0042	540	0	1	0
chrIV 8888043-8888205 +	NM_069140_in4		112		0.0042	541	2	0	1
chrI 9666612-9666712 +	NM_001025809_in6		50		0.0042	542	0	3	1
chrV 8278289-8278456 -	NM_072736_in4		117		0.0042	543	0	0	0
chrII 6602956-6603060 +	NM_062941_in3		54		0.0042	544	0	0	0
chrII 11467416-11467522 -	NM_064045_in4		56		0.0042	545	0	3	1
chrIII 8479061-8479190 -	NM_066471_in3		79		0.0042	546	0	1	0
chrI 52385-52490 +	NM_058265_in3		55		0.0042	547	1	0	2
chrII 9897919-9898019 -	NM_063737_in1		50		0.0042	548	0	0	0
chrX 6342617-6342719 +	NM_076661_in2		52		0.0042	549	0	0	0
chrIV 847764-847881 +	NM_067599_in3		67		0.0042	550	1	0	1
chrV 11704455-11704555 -	NM_073557_in3		50		0.0041	551	0	2	0
chrI 8846062-8846162 -	NM_059992_in1		50		0.0041	552	0	2	0
chrV 10396434-10396579 +	NM_073270_in5		95		0.004	553	0	0	0
chrI 9361562-9361681 +	NM_060092_in5	cel-mir-1019	69	known miRBase	0.004	554	697	1	59
chrX 17319341-17319445 +	NM_078409_in3		54		0.004	555	0	2	0
chrIII 12428487-12428593 +	NM_067218_in4		56		0.004	556	0	4	1
chrV 1431885-1432001 -	NM_071010_in7		66		0.004	557	0	0	0
chrI 6366624-6366729 +	NM_059437_in2		55		0.004	558	0	3	0
chrIV 8226935-8227035 -	NM_171396_in1		50		0.0039	559	0	0	0
chrIV 16721141-16721241 +	NM_070578_in2		50		0.0039	560	0	3	0
chrX 6207185-6207294 -	NM_076639_in4		59		0.0039	561	0	1	0
chrIII 7282684-7282784 +	NM_066202_in6		50		0.0039	562	0	1	0
chrX 14256232-14256381 +	NM_001136451_in1		99		0.0038	563	0	0	0
chrX 12281024-12281125 +	NM_077646_in2		51		0.0038	564	0	0	0
chrV 19349255-19349390 -	NM_075366_in15		85		0.0038	565	0	0	1
chrV 6216376-6216487 +	NM_001029024_in5		61		0.0038	566	0	1	0
chrII 6089744-6089845 -	NM_062819_in3		51		0.0038	567	0	0	0
chrIII 7631732-7631842 +	NM_066269_in11		60		0.0038	568	0	0	0
chrIII 7862222-7862379 +	NM_066307_in2		107		0.0038	569	0	0	0
chrI 8963982-8964110 +	NM_060011_in5		78		0.0038	570	4	4	1
chrI 6839118-6839238 +	NM_059556_in4		70		0.0038	571	1	5	1
chrIV 8513018-8513179 +	NM_001026149_in6		111		0.0038	572	1	0	1
chrII 11048300-11048408 -	NM_063967_in5		58		0.0038	573	0	0	0
chrI 14381820-14381920 -	NM_170938_in1		50		0.0037	574	2	0	1
chrI 6475975-6476075 +	NM_059462_in3		50		0.0037	575	0	0	0
chrV 2339811-2339922 -	NM_071244_in2		61		0.0037	576	0	0	0
chrII 7532696-7532816 +	NM_063178_in4		70		0.0037	577	0	0	0
chrII 11470898-11471006 -	NM_064046_in2		58		0.0037	578	0	0	0
chrX 7170360-7170524 -	NM_076805_in16		114		0.0037	579	0	0	0
chrV 10784310-10784415 +	NM_073354_in1		55		0.0037	580	0	0	0
chrIV 11632242-11632365 -	NM_069795_in1		73		0.0037	581	0	4	0
chrIV 992444-992603 +	NM_001028340_in2		109		0.0036	582	1	0	2
chrX 2910098-2910205 +	NM_076103_in3		57		0.0036	583	0	0	0
chrII 6066895-6067050 -	NM_062812_in2		105		0.0036	584	0	0	0
chrII 8995384-8995548 +	NM_063517_in2		114		0.0036	585	0	0	1
chrX 13151909-13152012 +	NM_077782_in5		53		0.0036	586	1	2	1
chrI 8704458-8704562 +	NM_059956_in9		54		0.0036	587	1	0	1
chrIV 14547144-14547246 -	NM_001028234_in2		52		0.0036	588	0	0	0
chrIII 12605794-12605903 -	NM_067241_in6		59		0.0036	589	1	4	1
chrII 8591336-8591441 +	NM_063417_in1		55		0.0035	590	0	1	0
chrI 5415419-5415519 -	NM_059187_in10		50		0.0035	591	1	0	1
chrII 3900438-3900538 +	NM_062288_in4		50		0.0035	592	0	0	0
chrIV 13230049-13230153 +	NM_001047491_in2		54		0.0035	593	7	10	2
chrV 11750314-11750462 +	NM_073562_in7		98		0.0035	594	0	2	0
chrII 11541972-11542072 -	NM_064065_in2		50		0.0035	595	0	1	0
chrI 5271897-5272004 -	NM_001025797_in2		57		0.0035	596	1	0	1
chrIV 240098-240199 -	NM_067481_in3		51		0.0035	597	0	1	0
chrIV 12278790-12278901 +	NM_001129287_in1		61		0.0035	598	0	4	0
chrX 6404348-6404455 +	NM_076674_in2		57		0.0034	599	0	0	0
chrI 8240359-8240460 -	NM_001026693_in11		51		0.0034	600	1	0	1
chrII 15038-15138 +	NM_061231_in8		50		0.0034	601	1	2	1
chrV 10526267-10526385 +	NM_073298_in1		68		0.0034	602	0	0	0
chrIII 11783692-11783792 +	NM_067124_in5		50		0.0034	603	0	0	0
chrII 7754672-7754787 -	NM_063226_in1		65		0.0034	604	0	0	0
chrV 3650747-3650847 +	NM_071622_in4		50		0.0034	605	0	0	0
chrI 8662728-8662878 +	NM_170903_in7		100		0.0034	606	0	0	0
chrX 4618982-4619083 -	NM_171673_in2		51		0.0033	607	0	0	0
chrI 6890308-6890408 +	NM_059567_in3		50		0.0033	608	0	0	0
chrIV 11322917-11323026 +	NM_069729_in5		59		0.0033	609	0	0	0
chrII 13121035-13121143 +	NM_064386_in5		58		0.0033	610	3	1	2
chrII 8081950-8082052 -	NM_063295_in2		52		0.0033	611	0	0	0
chrV 3754298-3754401 -	NM_071638_in5		53		0.0033	612	0	1	0
chrX 16969249-16969362 +	NM_078343_in9		63		0.0033	613	3	5	1
chrV 18134144-18134248 -	NM_075138_in5		54		0.0033	614	0	1	0
chrV 12429381-12429481 +	NM_073717_in1		50		0.0033	615	0	0	0
chrX 11857518-11857626 +	NM_171780_in1		58		0.0033	616	0	0	0
chrII 428512-428657 -	NM_061333_in3		95		0.0032	617	0	0	0
chrV 8963620-8963722 -	NM_072912_in7		52		0.0032	618	0	1	0
chrI 5741373-5741476 +	NM_059270_in3		53		0.0031	619	0	0	0
chrV 2710010-2710166 -	NM_001028501_in4		106		0.0031	620	0	0	0
chrII 1510820-1510921 -	NM_061582_in2		51		0.0031	621	6	2	2
chrV 13149075-13149186 +	NM_073871_in25		61		0.0031	622	0	0	0
chrV 18352397-18352498 +	NM_001136406_in2		51		0.0031	623	0	0	1
chrIV 7136033-7136140 -	NM_068719_in5		57		0.0031	624	0	1	0
chrI 378611-378730 -	NM_058326_in2		69		0.0031	625	0	5	0
chrIV 3580083-3580197 +	NM_001028270_in1		64		0.0031	626	1	5	1
chrIII 6119831-6119932 +	NM_001027596_in3		51		0.0031	627	0	1	0
chrV 20556623-20556727 -	NM_075565_in10		54		0.003	628	1	0	1
chrX 4991444-4991544 +	NM_076447_in15		50		0.003	629	0	2	0
chrX 8242293-8242395 +	NM_076990_in2		52		0.003	630	0	0	0
chrIII 10302894-10303004 +	NM_066876_in7		60		0.003	631	0	1	0
chrV 16011290-16011403 -	NM_074618_in2		63		0.003	632	0	0	0
chrIV 1952655-1952759 +	NM_067745_in6		54		0.003	633	1	0	1
chrI 7800839-7800964 -	NM_059757_in1		75		0.003	634	1	0	2
chrI 2638675-2638778 +	NM_058616_in1		53		0.003	635	18	13	2
chrV 17540806-17540917 +	NM_001028496_in1		61		0.003	636	1	4	1
chrV 10644327-10644435 +	NM_073324_in9		58		0.003	637	0	0	0
chrIV 14533625-14533727 -	NM_070361_in1		52		0.003	638	0	0	0
chrII 8621650-8621785 -	NM_063430_in4		85		0.0029	639	0	0	0
chrIII 10564030-10564134 +	NM_066927_in4		54		0.0029	640	0	0	0
chrV 2984310-2984414 -	NM_071412_in2		54		0.0029	641	0	0	0
chrIV 7880826-7880927 +	NM_068909_in7		51		0.0029	642	0	0	0
chrIII 2540371-2540482 +	NM_065175_in9		61		0.0029	643	0	0	0
chrIII 4957310-4957418 +	NM_065649_in1		58		0.0029	644	0	2	0
chrII 7942921-7943027 -	NM_063269_in1		56		0.0029	645	0	2	1
chrV 10426954-10427057 -	NM_182434_in3		53		0.0029	646	0	0	0
chrX 14074435-14074596 +	NM_077941_in8		111		0.0029	647	1	1	1
chrV 15383335-15383435 -	NM_074420_in5		50		0.0029	648	0	0	0
chrV 6775325-6775435 -	NM_072314_in4		60		0.0028	649	0	0	0
chrV 1913182-1913282 +	NM_071128_in1		50		0.0028	650	1	0	1
chrI 9720665-9720765 -	NM_001128948_in11		50		0.0028	651	0	2	0
chrII 12546744-12546856 +	NM_001027011_in1		62		0.0028	652	0	0	0
chrIV 12405645-12405747 +	NM_069967_in6		52		0.0028	653	0	0	0
chrIV 3662507-3662611 -	NM_067992_in7		54		0.0028	654	0	0	0
chrI 10793490-10793605 +	NM_060421_in1		65		0.0027	655	0	0	1
chrI 685462-685572 -	NM_058367_in3		60		0.0027	656	0	0	1
chrIV 8365704-8365821 +	NM_001027932_in6		67		0.0027	657	0	0	0
chrII 10451301-10451406 +	NM_063845_in3		55		0.0027	658	0	0	0
chrIV 9419184-9419284 -	NM_069261_in3		50		0.0027	659	0	0	0
chrII 1259738-1259892 +	NM_001027008_in3		104		0.0027	660	1	0	1
chrV 17100152-17100254 +	NM_074931_in2		52		0.0027	661	1	0	1
chrV 18717633-18717784 -	NM_075251_in3		101		0.0026	662	1	0	1
chrIII 11420111-11420215 +	NM_001027713_in15		54		0.0026	663	0	0	0
chrII 8620757-8620886 -	NM_063430_in2		79		0.0026	664	0	0	0
chrII 2773451-2773551 -	NM_061958_in1		50		0.0026	665	0	0	0
chrX 3605343-3605513 -	NM_076219_in4		120		0.0026	666	1	8	1
chrII 2318841-2318968 +	NM_061837_in2		77		0.0026	667	0	1	0
chrI 4648717-4648823 -	NM_059017_in1		56		0.0026	668	0	4	1
chrII 11465122-11465234 +	NM_001027219_in2		62		0.0026	669	1	3	1
chrII 5371529-5371629 +	NM_062605_in13		50		0.0026	670	0	1	0
chrII 10361598-10361698 +	NM_063830_in3		50		0.0025	671	1	0	1
chrV 12258445-12258547 +	NM_073672_in9		52		0.0025	672	0	0	0
chrV 7240924-7241025 +	NM_072441_in2		51		0.0025	673	0	0	0
chrIV 13191959-13192061 +	NM_070135_in4		52		0.0025	674	0	1	0
chrX 7663286-7663386 -	NM_076893_in5		50		0.0025	675	3	2	2
chrII 12637400-12637513 +	NM_064300_in4		63		0	676	0	0	0
chrII 11962561-11962661 +	NM_064147_in2		50		0	677	0	0	0
chrIII 11070244-11070377 +	NM_181907_in6		83		0	678	0	0	0
chrI 11258951-11259064 -	NM_060490_in6		63		0	679	5	4	2
chrIV 3154750-3154854 +	NM_067895_in7		54		0	680	1	0	1
chrV 15145090-15145190 +	NM_074335_in4		50		0	681	0	1	0
chrV 6197360-6197470 -	NM_001029033_in56		60		0	682	0	0	0
chrIII 13389485-13389588 +	NM_067357_in1		53		0	683	0	4	0
chrIII 906166-906269 -	NM_181959_in3		53		0	684	0	0	0
chrIII 13388026-13388133 +	NM_067356_in9		57		0	685	2	2	5
chrIII 3930608-3930775 -	NM_065393_in5		117		0	686	1	0	1
chrV 13338127-13338256 -	NM_073906_in1		79		0	687	0	0	0
chrX 4611364-4611493 -	NM_171672_in2		79		0	688	0	4	0
chrV 2303702-2303805 -	NM_071231_in1		53		0	689	0	0	1
chrX 6208859-6208963 -	NM_076641_in1		54		0	690	0	4	0
chrX 13185340-13185447 -	NM_077787_in8		57		0	691	0	0	0
chrII 5910395-5910498 +	NM_062779_in7		53		0	692	0	0	0
chrV 10429027-10429130 -	NM_073279_in1		53		0	693	0	1	0
chrI 13393744-13393846 +	NM_060956_in4		52		0	694	0	3	0
chrI 5360349-5360454 +	NM_059175_in7		55		0	695	0	0	0
chrII 2322476-2322582 -	NM_061839_in1		56		0	696	1	0	1
chrV 12450861-12450962 +	NM_073723_in1		51		0	697	1	0	1
chrX 2192568-2192687 +	NM_076003_in1		69		0	698	0	0	0
chrII 13187017-13187117 -	NM_064399_in3		50		0	699	0	3	0
chrII 5479407-5479533 +	NM_062641_in5		76		0	700	0	2	1
chrX 2612936-2613036 -	NM_076069_in4		50		0	701	0	0	0
chrII 1282465-1282567 -	NM_061537_in3		52		0	702	0	0	0
chrI 3199544-3199651 -	NM_058720_in1		57		0	703	0	0	1
chrX 3093326-3093453 -	NM_076128_in3		77		0	704	0	1	0
chrIII 7276887-7276988 -	NM_066201_in5		51		0	705	0	14	0
chrV 18761332-18761432 +	NM_075262_in1		50		0	706	0	0	0
chrV 4827690-4827791 +	NM_071891_in2		51		0	707	0	1	0
chrX 10056204-10056306 +	NM_077285_in7		52		0	708	0	1	0
chrV 5239188-5239288 -	NM_071998_in4		50		0	709	0	0	0
chrIII 9075081-9075237 -	NM_001026072_in1		106		0	710	0	0	0
chrII 2406934-2407089 -	NM_061868_in4		105		0	711	0	0	0
chrIII 10005492-10005599 -	NM_001025971_in1		57		0	712	0	0	0
chrIII 6932926-6933027 +	NM_066109_in6		51		0	713	0	1	0
chrII 10421122-10421287 -	NM_063840_in5		115		0	714	0	0	0
chrII 10779712-10779856 -	NM_063917_in3		94		0	715	1	7	1
chrX 14560824-14560926 +	NM_078022_in6		52		0	716	1	0	1
chrIV 10895616-10895731 -	NM_069623_in2		65		0	717	0	0	0
chrII 5622987-5623088 +	NM_062693_in1		51		0	718	0	1	0
chrII 5631449-5631550 +	NM_062696_in1		51		0	718	0	1	0
chrIV 7945585-7945689 -	NM_068926_in3		54		0	720	0	2	0
chrII 5456796-5456896 +	NM_062635_in2		50		0	721	0	0	0
chrII 8282864-8282978 -	NM_063348_in3		64		0	722	0	6	0
chrII 3614860-3614975 +	NM_062194_in8		65		0	723	2	1	2
chrX 14357187-14357335 -	NM_077994_in7		98		0	724	0	2	0
chrII 6900439-6900540 +	NM_063011_in6		51		0	725	0	0	0
chrII 2918943-2919090 -	NM_182189_in1		97		0	726	0	0	0
chrX 17093886-17093987 +	NM_078363_in4		51		0	727	0	0	0
chrIV 13386654-13386778 +	NM_001083269_in2		74		0	728	0	1	0
chrV 13552052-13552153 +	NM_073954_in1		51		0	729	1	0	1
chrIV 12565744-12565849 -	NM_070004_in5		55		0	730	0	3	0
chrX 1325348-1325449 +	NM_001029571_in6		51		0	731	0	0	0
chrX 3166259-3166366 +	NM_171649_in2		57		0	732	0	0	0
chrI 9225471-9225585 -	NM_060066_in6		64		0	733	1	2	1
chrV 3103667-3103770 -	NM_071448_in2		53		0	734	0	0	0
chrI 7967090-7967191 -	NM_059796_in1		51		0	735	1	0	1
chrI 6851987-6852114 +	NM_059561_in3		77		0	736	0	0	0
chrX 6294399-6294513 +	NM_076653_in2		64		0	737	0	0	0
chrX 3928554-3928671 +	NM_076279_in5		67		0	738	0	0	0
chrI 2790105-2790217 -	NM_058645_in6		62		0	739	0	0	0
chrII 4654918-4655018 -	NM_062422_in7		50		0	740	0	2	0
chrIII 5729730-5729831 +	NM_065836_in4		51		0	741	0	3	0
chrV 3930232-3930332 +	NM_071688_in4		50		0	742	0	0	0
chrII 375331-375431 +	NM_061318_in1		50		0	743	0	0	0
chrV 9979588-9979695 -	NM_073166_in3		57		0	744	0	4	0
chrIII 8008503-8008652 -	NM_066343_in7		99		0	745	0	1	0
chrIV 9280720-9280843 +	NM_069219_in16		73		0	746	3	1	3
chrV 11527999-11528134 +	NM_073525_in2		85		0	747	0	0	0
chrII 9806644-9806761 -	NM_063714_in4		67		0	748	0	0	0
chrX 17388892-17388993 -	NM_171817_in4		51		0	749	0	2	0
chrX 2935578-2935684 +	NM_076104_in6		56		0	750	0	1	0
chrX 16301720-16301823 +	NM_078253_in1		53		0	751	1	0	1
chrIII 12649998-12650099 +	NM_067244_in19		51		0	752	0	0	1
chrIII 9915024-9915124 +	NM_066796_in3		50		0	753	0	0	0
chrI 6840604-6840715 +	NM_059556_in11		61		0	754	0	1	0
chrIV 2313850-2313955 -	NM_001028280_in5		55		0	755	2	0	5
chrIII 9761889-9761998 -	NM_001027578_in9		59		0	756	0	0	0
chrIV 4980241-4980377 -	NM_001027937_in2		86		0	757	0	1	0
chrII 5810647-5810748 +	NM_062749_in1		51		0	758	0	1	0
chrV 6367991-6368112 -	NM_072221_in6		71		0	759	0	0	0
chrX 15862373-15862474 -	NM_078206_in3		51		0	760	1	2	1
chrIII 9600401-9600502 -	NM_066723_in3		51		0	761	0	0	0
chrIV 2800270-2800372 +	NM_001028316_in1		52		0	762	0	1	0
chrIII 6931240-6931345 +	NM_001027452_in4		55		0	763	0	2	0
chrX 6732417-6732521 -	NM_076734_in9		54		0	764	0	0	0
chrII 771365-771484 +	NM_061403_in3		69		0	765	0	0	0
chrIV 3699181-3699310 +	NM_067998_in3		79		0	766	1	0	12
chrII 6580762-6580863 -	NM_062932_in5		51		0	767	0	0	0
chrIV 12147802-12147904 -	NM_069907_in3		52		0	768	0	1	0
chrIII 10406373-10406502 -	NM_066895_in1		79		0	769	0	2	0
chrV 5061822-5061924 -	NM_171456_in10		52		0	770	0	0	0
chrX 11578102-11578202 +	NM_077533_in5		50		0	771	0	0	0
chrIV 7880127-7880267 +	NM_068909_in5		90		0	772	0	0	0
chrX 14082442-14082542 -	NM_077943_in11		50		0	773	0	0	0
chrI 14860614-14860716 -	NM_061195_in6		52		0	774	0	15	0
chrI 3524370-3524470 -	NM_001026595_in2		50		0	775	0	0	0
chrX 7268279-7268388 -	NM_076823_in3		59		0	776	0	1	0
chrX 5408913-5409018 -	NM_076521_in3		55		0	777	0	1	0
chrII 9804848-9804968 +	NM_063713_in4		70		0	778	8	0	12
chrII 13628461-13628567 -	NM_064464_in1		56		0	779	0	0	0
chrIV 8675476-8675581 +	NM_069086_in19		55		0	780	0	0	0
chrII 5038313-5038419 -	NM_062528_in3		56		0	781	0	0	0
chrV 6839813-6839915 +	NM_072339_in4		52		0	782	1	2	1
chrX 7757409-7757509 -	NM_076909_in3		50		0	783	0	0	0
chrV 7492506-7492615 -	NM_072527_in4		59		0	784	0	0	0
chrX 3794058-3794161 -	NM_076257_in1		53		0	785	0	0	0
chrX 17384170-17384272 -	NM_078417_in2		52		0	786	0	0	0
chrV 16538663-16538769 +	NM_074787_in1		56		0	787	0	0	0
chrV 8358978-8359078 -	NM_072754_in3		50		0	788	0	0	0
chrV 8063614-8063722 -	NM_072678_in1		58		0	789	2	0	1
chrI 4563303-4563468 +	NM_058989_in15		115		0	790	0	0	0
chrX 1141278-1141379 -	NM_075817_in12		51		0	791	0	0	0
chrV 13845468-13845572 +	NM_074028_in1		54		0	792	0	0	0
chrV 9543917-9544017 -	NM_073061_in4		50		0	793	0	0	0
chrX 11083690-11083792 +	NM_001038482_in9		52		0	794	0	0	0
chrIV 6227075-6227185 +	NM_068536_in8		60		0	795	0	0	0
chrIV 1227250-1227352 +	NM_067655_in3		52		0	796	0	2	0
chrV 8953683-8953787 +	NM_072909_in5		54		0	797	0	0	0
chrIV 9151376-9151497 +	NM_069194_in4		71		0	798	0	17	0
chrII 4937124-4937225 +	NM_062502_in7		51		0	799	0	0	0
chrI 7245005-7245106 +	NM_059646_in1		51		0	800	4	6	2
chrX 14614341-14614441 +	NM_078030_in9		50		0	801	0	0	0
chrV 15689359-15689496 +	NM_074500_in3		87		0	802	0	0	1
chrX 14091630-14091771 +	NM_077945_in3		91		0	803	0	1	1
chrIV 13378166-13378272 +	NM_070173_in1		56		0	804	1	24	3
chrV 13725913-13726013 +	NM_073997_in1		50		0	805	0	0	0
chrV 6566622-6566739 +	NM_072268_in1		67		0	806	0	0	0
chrI 8206707-8206852 +	NM_001025916_in8		95		0	807	1	0	1
chrIII 4397964-4398064 +	NM_065486_in2		50		0	808	0	0	0
chrII 15026082-15026190 +	NM_064697_in1		58		0	809	1	1	1
chrII 7587163-7587280 -	NM_001026977_in3		67		0	810	1	0	1
chrIII 1182058-1182175 +	NM_064943_in1		67		0	811	1	0	1
chrV 7130924-7131041 -	NM_072406_in5		67		0	812	0	0	0
chrX 11949544-11949645 +	NM_077599_in2		51		0	813	26	1	20
chrI 1340744-1340850 +	NM_058441_in1		56		0	814	0	9	0
chrIV 11014409-11014513 -	NM_171917_in6		54		0	815	0	1	0
chrV 9638119-9638268 -	NM_001028939_in5		99		0	816	0	3	0
chrI 9979160-9979291 -	NM_060237_in3		81		0	817	0	7	0
chrI 2252983-2253085 +	NM_001037885_in6		52		0	818	0	2	0
chrV 4175969-4176069 +	NM_071761_in1		50		0	819	4	0	3
chrI 7853988-7854088 +	NM_059769_in2		50		0	820	0	0	0
chrIII 3703674-3703775 +	NM_065347_in1		51		0	821	0	6	0
chrI 2401114-2401235 -	NM_170824_in13		71		0	822	5	0	6
chrII 6298447-6298571 -	NM_062863_in4		74		0	824	0	5	0
chrII 6299509-6299633 +	NM_062864_in1		74		0	824	0	5	0
chrX 13647678-13647780 +	NM_077885_in1		52		0	825	2	5	1
chrV 4220588-4220688 +	NM_071768_in3		50		0	826	0	2	0
chrII 8109415-8109515 -	NM_063299_in3		50		0	827	0	0	0
chrIII 5749784-5749885 +	NM_065842_in5		51		0	828	0	1	0
chrV 7060810-7060915 +	NM_171930_in1		55		0	829	6	2	2
chrIV 4652820-4652924 +	NM_068203_in3		54		0	830	0	5	0
chrIII 11417975-11418097 +	NM_001027712_in8		72		0	831	0	0	0
chrIII 5104196-5104297 +	NM_001027434_in4		51		0	832	0	0	1
chrIII 6363900-6364006 +	NM_171163_in12		56		0	833	1	5	1
chrII 12066857-12066975 +	NM_064167_in4		68		0	834	0	0	0
chrV 15571536-15571645 +	NM_074470_in1		59		0	835	1	0	1
chrX 13861960-13862098 -	NM_077909_in3		88		0	836	0	0	0
chrIV 10986284-10986422 +	NM_069646_in1		88		0	837	2	5	1
chrX 4461990-4462099 -	NM_076367_in10		59		0	838	0	1	0
chrIV 6820249-6820370 +	NM_068647_in6		71		0	839	0	0	1
chrIII 13362377-13362535 -	NM_001027573_in5		108		0	840	0	0	0
chrX 13981068-13981192 +	NM_001029521_in2		74		0	841	0	7	0
chrI 1066745-1066875 -	NM_058415_in8		80		0	842	0	0	1
chrX 4007352-4007456 +	NM_076288_in11		54		0	843	0	0	0
chrV 13274434-13274536 -	NM_073892_in2		52		0	844	0	0	0
chrX 4514105-4514205 +	NM_001029196_in1		50		0	845	0	2	1
chrI 6165410-6165517 -	NM_059376_in3		57		0	846	0	0	0
chrI 11292857-11292980 -	NM_060498_in1		73		0	847	3	2	1
chrIII 3464089-3464196 +	NM_065313_in4		57		0	848	1	5	1
chrII 12447560-12447660 +	NM_064245_in8		50		0	849	0	0	0
chrI 6448602-6448718 +	NM_059454_in5		66		0	850	2	0	2
chrX 14977742-14977849 +	NM_078085_in4		57		0	851	1	2	1
chrIV 7457383-7457483 +	NM_068790_in2		50		0	852	0	0	0
chrI 5250976-5251077 +	NM_059151_in13		51		0	853	0	0	0
chrII 14528745-14528856 +	NM_064619_in1		61		0	854	4	0	4
chrX 2604440-2604543 +	NM_171636_in8		53		0	855	0	0	0
chrV 14092115-14092261 +	NM_074094_in6		96		0	856	0	0	0
chrIV 12404835-12404955 +	NM_069967_in3		70		0	857	0	0	0
chrX 594854-594954 +	NM_075723_in3		50		0	858	1	0	1
chrIV 4442668-4442769 -	NM_068165_in1		51		0	859	0	0	0
chrV 3481783-3481933 -	NM_071571_in1		100		0	860	0	11	0
chrIII 7765468-7765585 -	NM_066289_in4		67		0	861	0	1	0
chrII 1705393-1705494 -	NM_061648_in2		51		0	862	0	0	0
chrIV 4158278-4158381 +	NM_068098_in1		53		0	863	0	2	0
chrX 3233326-3233431 -	NM_076150_in15		55		0	864	0	2	0
chrIV 9706252-9706352 -	NM_069324_in22		50		0	865	0	0	0
chrI 13722567-13722671 -	NM_061001_in3		54		0	866	0	1	0
chrV 9951764-9951879 +	NM_073160_in3		65		0	867	0	1	0
chrIV 2676538-2676643 +	NM_067842_in1		55		0	868	0	7	0
chrX 12111480-12111582 +	NM_077623_in1		52		0	869	0	0	0
chrIII 3403540-3403643 -	NM_065302_in5		53		0	870	0	0	0
chrV 12139110-12139214 +	NM_073644_in4		54		0	871	0	0	0
chrII 5474502-5474613 +	NM_001027036_in1		61		0	872	0	1	0
chrIV 7908660-7908801 -	NM_068916_in3		91		0	873	0	1	0
chrX 5644677-5644777 -	NM_076549_in7		50		0	874	0	0	4
chrI 9326900-9327027 +	NM_060083_in22		77		0	875	0	0	1
chrIII 971551-971663 -	NM_064907_in12		62		0	876	152	73	6
chrIII 8724626-8724732 +	NM_066524_in9		56		0	877	0	0	0
chrII 4417692-4417853 +	NM_062378_in1		111		0	878	0	0	0
chrII 13742272-13742375 +	NM_001027104_in2		53		0	879	1	1	1
chrIII 9957444-9957544 +	NM_001027542_in1		50		0	880	0	3	1
chrX 6860172-6860273 +	NM_076754_in7		51		0	881	0	1	0
chrX 10892176-10892283 +	NM_077418_in1		57		0	882	0	0	0
chrII 1824687-1824788 +	NM_061685_in1		51		0	883	0	0	1
chrV 416001-416109 -	NM_001029143_in1		58		0	884	0	0	0
chrX 15266110-15266216 +	NM_001029500_in6		56		0	885	0	2	0
chrIV 12969100-12969203 -	NM_070082_in7		53		0	886	0	0	0
chrIII 6281686-6281787 +	NM_065974_in4		51		0	887	0	4	0
chrII 11311295-11311425 +	NM_001027191_in8		80		0	888	0	0	0
chrIII 10210579-10210688 +	NM_066860_in3		59		0	889	0	0	0
chrIII 1807864-1807968 -	NM_065059_in1		54		0	890	3	0	1
chrIV 9940823-9940924 -	NM_069391_in13		51		0	891	0	0	0
chrII 7207659-7207787 -	NM_063099_in2		78		0	892	2	1	1
chrV 7339407-7339510 -	NM_072468_in2		53		0	893	0	1	0
chrIII 7134375-7134477 +	NM_171183_in3		52		0	894	4	1	1
chrIV 9238140-9238240 +	NM_001047553_in5		50		0	895	1	0	1
chrV 17776903-17777034 -	NM_075090_in6		81		0	896	2	1	3
chrIV 7408928-7409031 +	NM_001027908_in5		53		0	897	0	1	0
chrV 16862547-16862714 +	NM_074859_in2		117		0	898	0	0	1
chrI 4740830-4740933 -	NM_059039_in5		53		0	899	1	7	1
chrV 16302786-16302890 +	NM_074717_in1		54		0	900	1	0	2
chrV 48929-49042 +	NM_070727_in1		63		0	901	0	0	0
chrV 6912365-6912466 -	NM_072352_in25		51		0	902	0	3	0
chrV 2926786-2926886 -	NM_071393_in6		50		0	903	0	0	0
chrV 7015424-7015525 -	NM_072376_in2		51		0	904	0	0	1
chrIII 8606728-8606853 -	NM_066493_in1		75		0	905	0	0	0
chrV 7237837-7237937 +	NM_072440_in2		50		0	906	1	1	1
chrV 9498288-9498410 +	NM_073047_in5		72		0	907	0	0	0
chrX 9113011-9113111 +	NM_171966_in18		50		0	908	0	0	0
chrV 4286599-4286706 +	NM_071781_in2		57		0	910	0	0	0
chrV 4276502-4276609 -	NM_071779_in3		57		0	910	0	0	0
chrX 10921256-10921404 -	NM_077425_in1		98		0	911	0	1	1
chrV 821904-822013 -	NM_001028742_in1		59		0	912	1	0	1
chrIV 9638934-9639067 -	NM_069309_in7		83		0	913	0	1	0
chrI 12475135-12475242 -	NM_001129052_in2		57		0	914	1	0	1
chrIV 11137108-11137210 -	NM_069683_in4		52		0	915	0	0	0
chrV 7845364-7845466 -	NM_171486_in3		52		0	916	2	0	1
chrI 9009913-9010083 -	NM_001037886_in3		120		0	917	2	0	1
chrI 1087362-1087476 +	NM_058418_in2		64		0	918	1	0	1
chrX 10945473-10945577 -	NM_077428_in1		54		0	919	0	0	0
chrIV 11576875-11576993 +	NM_069778_in3		68		0	920	1	4	1
chrII 5368342-5368445 -	NM_062606_in1		53		0	921	2	0	1
chrX 9431586-9431689 +	NM_077183_in1		53		0	922	0	0	0
chrIII 8308048-8308151 +	NM_066423_in3		53		0	923	0	0	0
chrIII 8332821-8332921 +	NM_066435_in3		50		0	924	0	1	0
chrV 520320-520454 -	NM_070831_in2		84		0	925	0	0	0
chrV 7752929-7753041 -	NM_072601_in3		62		0	926	102	0	23
chrII 13059365-13059490 +	NM_064375_in3		75		0	927	0	2	0
chrV 4765464-4765575 -	NM_071880_in5		61		0	928	0	0	0
chrII 8807304-8807408 -	NM_063475_in1		54		0	929	0	1	0
chrIII 8085293-8085394 -	NM_066362_in7		51		0	930	0	5	0
chrV 3380270-3380377 -	NM_071540_in11		57		0	931	0	0	0
chrI 5143797-5143898 +	NM_059132_in3		51		0	932	0	0	0
chrIV 12744390-12744543 -	NM_070033_in3		103		0	933	0	1	0
chrV 2903087-2903228 -	NM_071388_in8		91		0	934	0	0	0
chrIV 5224952-5225058 -	NM_068344_in1		56		0	935	0	8	0
chrX 9819013-9819127 -	NM_077244_in12		64		0	936	0	0	0
chrV 14058001-14058153 +	NM_074090_in2		102		0	937	3	0	4
chrII 2233623-2233727 +	NM_061817_in1		54		0	938	0	7	0
chrX 3770244-3770347 -	NM_076250_in3		53		0	939	0	0	0
chrX 7304930-7305065 -	NM_076828_in10		85		0	940	0	0	0
chrI 5802175-5802295 +	NM_059283_in2		70		0	941	0	1	0
chrV 8721865-8721965 -	NM_072844_in4		50		0	942	0	0	0
chrI 8974369-8974469 -	NM_001128998_in6		50		0	943	0	0	0
chrII 4492084-4492218 -	NM_062394_in3		84		0	944	0	0	0
chrII 6918218-6918319 -	NM_063017_in4		51		0	945	0	0	0
chrV 3200397-3200497 -	NM_071480_in5		50		0	946	0	2	0
chrII 5350860-5350962 +	NM_062600_in2		52		0	947	0	0	0
chrV 1174688-1174791 +	NM_070987_in5		53		0	948	1	0	1
chrIV 11319099-11319201 +	NM_069728_in6		52		0	949	0	0	0
chrI 120160-120266 +	NM_058279_in4		56		0	950	1	0	3
chrIII 3718841-3718942 -	NM_065352_in1		51		0	951	1	0	1
chrV 5277843-5277944 -	NM_072011_in4		51		0	952	1	4	1
chrI 5130140-5130252 +	NM_059127_in2		62		0	953	0	1	0
chrIII 5881300-5881404 +	NM_065874_in5		54		0	954	1	1	1
chrIV 10838687-10838788 -	NM_001136398_in7		51		0	955	0	1	0
chrIV 10233765-10233865 -	NM_069474_in1		50		0	956	0	1	0
chrX 8661285-8661399 +	NM_001029607_in1		64		0	957	0	1	1
chrV 10384220-10384320 +	NM_001026168_in1		50		0	958	0	5	0
chrX 12938765-12938871 -	NM_077749_in1		56		0	959	0	0	0
chrII 8478396-8478561 -	NM_063389_in2		115		0	960	0	2	0
chrII 5414738-5414862 +	NM_062624_in2		74		0	961	0	0	0
chrI 3695058-3695158 -	NM_058801_in2		50		0	962	0	0	0
chrIV 9163846-9163950 -	NM_069198_in4		54		0	963	0	1	0
chrII 13994494-13994596 -	NM_064529_in1		52		0	964	0	0	0
chrV 15395710-15395812 +	NM_074424_in1		52		0	965	0	0	0
chrIII 4511731-4511839 +	NM_001027378_in10		58		0	966	0	1	0
chrX 6672979-6673085 +	NM_001029464_in1		56		0	967	1	0	1
chrIII 9747989-9748090 +	NM_001027576_in3		51		0	968	5	3	1
chrIV 8714367-8714474 -	NM_069095_in6		57		0	969	0	0	0
chrI 15032791-15032943 -	NM_061220_in7		102		0	970	2	0	1
chrV 3954848-3954951 +	NM_071697_in3		53		0	971	0	0	0
chrV 3371340-3371454 -	NM_071538_in2		64		0	972	0	0	0
chrI 8104919-8105026 +	NM_001025823_in2		57		0	973	0	0	0
chrIII 812401-812512 +	NM_064864_in2		61		0	974	4	7	1
chrII 10647524-10647634 +	NM_063896_in1		60		0	975	0	0	0
chrIII 3706379-3706480 +	NM_065348_in3		51		0	976	0	3	1
chrIII 8233446-8233546 +	NM_171213_in3		50		0	977	0	7	1
chrV 16848186-16848296 -	NM_001028979_in6		60		0	978	0	0	0
chrV 11545979-11546082 +	NM_001129467_in2		53		0	979	0	0	0
chrV 13309126-13309235 +	NM_073896_in3		59		0	980	0	0	0
chrV 14452098-14452198 +	NM_074180_in6		50		0	981	0	1	0
chrV 420080-420184 +	NM_001029061_in2		54		0	982	0	0	0
chrIII 5270807-5270908 +	NM_065724_in3		51		0	983	0	1	0
chrII 14410380-14410485 +	NM_064598_in6		55		0	984	0	3	0
chrI 2063545-2063645 -	NM_058521_in5		50		0	985	0	0	0
chrI 5647980-5648089 -	NM_182038_in5		59		0	986	0	1	0
chrII 3721501-3721609 +	NM_062228_in2		58		0	987	0	0	0
chrV 490893-490996 +	NM_070818_in4		53		0	988	0	1	0
chrV 12232165-12232313 -	NM_073664_in3		98		0	989	1	3	1
chrIII 10394414-10394514 -	NM_066893_in3		50		0	990	0	1	0
chrI 4368323-4368488 +	NM_058956_in2		115		0	991	2	4	1
chrIV 5538764-5538864 +	NM_001028204_in1		50		0	992	0	1	0
chrX 12115214-12115317 +	NM_077624_in6		53		0	993	1	1	1
chrV 4950342-4950446 +	NM_071930_in3		54		0	994	0	0	0
chrII 2361242-2361343 -	NM_061853_in7		51		0	995	0	0	0
chrII 8544547-8544649 +	NM_063403_in12		52		0	996	0	1	0
chrIV 2253170-2253281 -	NM_067782_in1		61		0	997	0	1	0
chrIII 4544787-4544894 -	NM_065520_in5		57		0	998	1	0	1
chrII 2779578-2779680 +	NM_061960_in4		52		0	999	0	0	0
chrX 12043830-12043932 -	NM_077614_in2		52		0	1000	0	2	0
chrIV 6485679-6485782 +	NM_068586_in11		53		0	1008	966	0	34
chrIV 1424141-1424243 -	NM_067678_in4		52		0	1016	37	177	5
chrV 11489345-11489453 -	NM_073514_in1		58		0	1042	72	36	7
chrX 15837901-15838005 -	NM_078202_in6		54		0	1054	5	3	1
chrV 7572075-7572178 -	NM_072551_in1		53		0	1094	6	1	2
chrIV 7179355-7179457 +	NM_068731_in1		52		0	1099	14	0	10
chrX 14323537-14323640 +	NM_077985_in19		53		0	1102	11	2	2
chrX 14139830-14139955 -	NM_077954_in4		75		0	1128	5	11	1
chrIV 17248008-17248156 +	NM_070657_in5		98		0	1136	164	0	29
chrV 6180811-6180921 -	NM_001029030_in7		60		0	1147	8	2	2
chrII 12811900-12812005 -	NM_064324_in1		55		0	1151	6	0	2
chrV 3502483-3502593 +	NM_071576_in1		60		0	1152	6	14	2
chrIII 378087-378220 -	NM_171062_in1		83		0	1209	16	7	4
chrIII 399237-399371 -	NM_064794_in4		84		0	1306	13	2	9
chrI 10899203-10899357 +	NM_060440_in1		104		0	1366	8	0	5
chrII 6512321-6512432 -	NM_062915_in7		61		0	1423	9	5	1
chrIII 13463144-13463302 +	NM_001027628_in1		108		0	1504	77	35	29
chrX 13490416-13490529 -	NM_001083291_in5		63		0	1522	40	44	6
chrV 20385252-20385352 +	NM_075528_in6		50		0	1558	6	12	2
chrIV 5446995-5447165 +	NM_001083266_in12		120		0	1573	1261	0	48
chrI 13842110-13842210 -	NM_061021_in1		50		0	1576	10	4	2
chrIV 15646101-15646201 -	NM_070481_in1		50		0	1577	10	1	2
chrIV 5367904-5368004 +	NM_068390_in3		50		0	1588	6	8	8
chrV 1913784-1913892 -	NM_071129_in1		58		0	1647	5	3	2
chrIII 1074325-1074450 -	NM_001027799_in6		75		0	1648	5	9	1
chrIV 3288267-3288369 -	NM_067908_in6		52		0	1685	19	94	4
chrI 11585905-11586016 -	NM_060554_in15		61		0	1716	17	6	6
chrV 426207-426321 +	NM_070796_in8		64		0	1731	6	6	3
chrI 2759211-2759338 -	NM_001129081_in1		77		0	1764	6	0	2
chrV 6625817-6625926 -	NM_072283_in4		59		0	1775	10	2	5
chrX 10551435-10551543 -	NM_077367_in6		58		0	1935	5	1	1
chrV 14045508-14045614 -	NM_074087_in1		56		0	1939	7	21	1
chrV 14048377-14048483 +	NM_074088_in2		56		0	1939	7	19	1
chrV 18818368-18818474 +	NM_075276_in17		56		0	1939	7	21	1
chrIV 3578930-3579033 +	NM_067974_in2		53		0	1952	6	8	2
chrIII 196162-196266 +	NM_064775_in12		54		0	1956	22	0	5
chrX 16521321-16521421 +	NM_078278_in9		50		0	1974	63	91	4
chrX 14217859-14217963 +	NM_001029595_in9		54		0	2005	11	31	1
chrIV 3740262-3740366 -	NM_068007_in3		54		0	2006	10	1	2
chrIV 2488862-2488966 +	NM_067810_in1		54		0	2014	13	19	1
chrIV 5684060-5684168 +	NM_171348_in4		58		0	2020	11	20	1
chrIV 3599912-3600016 -	NM_067980_in2		54		0	2038	8	42	1
chrX 8286235-8286381 +	NM_076997_in4		96		0	2052	46	17	3
chrIII 6424282-6424401 -	NM_066006_in4		69		0	2070	8	4	1
chrV 423875-423977 +	NM_070795_in5		52		0	2074	5	0	1
chrX 15158369-15158471 -	NM_078116_in3		52		0	2078	60	127	4
chrII 13111294-13111403 -	NM_064385_in8		59		0	2187	9	0	7
chrV 12696332-12696450 +	NM_001028878_in2		68		0	2211	62	23	15
chrI 3952246-3952363 -	NM_058869_in15		67		0	2246	5	0	15
chrV 3558546-3558665 +	NM_071599_in2		69		0	2352	22	80	14
chrII 12532100-12532206 +	NM_064276_in3		56		0	2360	18	0	11
chrII 14406820-14406920 +	NM_001026949_in3		50		0	2370	6	3	2
chrIII 9059377-9059481 +	NM_066605_in1		54		0	2374	6	0	2
chrV 10567002-10567102 +	NM_073309_in5		50		0	2402	74	33	7
chrII 12538004-12538109 +	NM_064277_in7		55		0	2429	148	443	13
chrIV 6231926-6232052 +	NM_068538_in6		76		0	2440	12	0	7
chrX 140522-140639 -	NM_075664_in1		67		0	2451	12	11	3
chrX 1372203-1372305 +	NM_075854_in1		52		0	2466	14	18	2
chrIII 505630-505735 -	NM_064805_in1		55		0	2470	15	17	3
chrX 16607041-16607210 -	NM_078285_in8		119		0	2556	12	0	3
chrIV 11746203-11746309 +	NM_069824_in2		56		0	2559	12	2	2
chrII 4698257-4698384 -	NM_062434_in5		77		0	2600	7	9	3
chrI 11680348-11680456 +	NM_060573_in6		58		0	2617	35	21	5
chrX 2259393-2259504 -	NM_076015_in1		61		0	2679	5	2	1
chrII 1931463-1931570 -	NM_061731_in2		57		0	2693	37	73	2
chrIII 11027628-11027733 -	NM_067018_in3		55		0	2748	49	143	8
chrV 14888047-14888213 -	NM_074266_in2		116		0	2753	8	6	1
chrV 14881679-14881845 -	NM_074269_in2		116		0	2753	8	6	1
chrI 8701390-8701544 -	NM_001129002_in8		104		0	2781	5	3	1
chrX 13729348-13729464 +	NM_077896_in10		66		0	2857	5	2	4
chrV 10305103-10305237 -	NM_073248_in15		84		0	2905	36	0	18
chrV 4561214-4561314 +	NM_071837_in3		50		0	2910	141	437	13
chrII 1945997-1946099 -	NM_061735_in7		52		0	2990	231	343	18
chrII 2840034-2840155 +	NM_061979_in3		71		0	2999	6	1	1
chrV 20476501-20476606 -	NM_075540_in1		55		0	3052	31	14	11
chrX 2636933-2637048 -	NM_076071_in1		65		0	3054	5	0	2
chrIV 13203810-13203923 -	NM_070137_in7		63		0	3061	5	5	4
chrII 4059333-4059436 -	NM_062315_in1		53		0	3112	12	11	2
chrV 12442444-12442544 -	NM_073719_in18		50		0	3115	5	0	4
chrI 6542470-6542572 +	NM_059483_in3		52		0	3206	9	0	3
chrV 20441640-20441742 -	NM_075532_in3		52		0	3211	188	374	16
chrV 4561573-4561673 +	NM_071837_in5		50		0	3245	50	132	11
chrI 7250789-7250942 -	NM_001129029_in6		103		0	3254	26	15	2
chrI 1339346-1339455 +	NM_001083139_in2		59		0	3371	15	7	2
chrII 12458340-12458506 +	NM_064250_in2		116		0	3373	9	0	9
chrV 326357-326503 -	NM_070774_in6		96		0	3537	167	64	9
chrX 8409957-8410088 -	NM_077024_in1		81		0	3537	8	1	5
chrIII 693534-693635 -	NM_001026012_in4		51		0	3537	23	18	4
chrX 4323117-4323228 +	NM_076338_in7		61		0	3537	6	0	3
chrV 420902-421021 +	NM_171430_in6		69		0	3537	8	4	2
chrIV 1980154-1980260 +	NM_067752_in1		56		0	3537	137	185	10
chrX 1932567-1932706 +	NM_075952_in9		89		0	3537	29	80	2
chrIV 326505-326658 -	NM_067504_in2		103		0	3537	5	11	2
chrX 3101642-3101756 -	NM_076130_in5		64		0	3537	6	0	5
chrV 2094972-2095125 -	NM_071166_in6		103		0	3537	10	1	2
chrII 2154437-2154601 +	NM_061800_in2		114		-99	17103	449	154	13
chrIV 12388429-12388530 -	NM_069963_in2		51		-99	17103	10	0	5
chrIV 1423646-1423804 -	NM_067678_in1		108		-99	17103	268	228	14
chrIV 5887824-5887970 +	NM_068483_in3		96		-99	17103	81	2	16
chrII 1662033-1662141 -	NM_061630_in1		58		-99	17103	178	1	41
chrV 15771543-15771690 -	NM_074529_in2		97		-99	17103	21	7	3
chrIV 14394752-14394916 +	NM_070345_in2		114		-99	17103	482	2	61
chrX 15857236-15857346 +	NM_078207_in1		60		-99	17103	7	15	1
chrIII 12315465-12315573 +	NM_001027775_in1		58		-99	17103	386	540	14
chrII 11174648-11174754 -	NM_063992_in7		56		-99	17103	252	265	8
chrIV 7507710-7507833 -	NM_068810_in4		73		-99	17103	12	8	3
chrX 13350017-13350122 -	NM_077822_in1		55		-99	17103	5	0	2
chrI 11222374-11222525 +	NM_001129075_in1		101		-99	17103	7	2	3
chrII 12538370-12538470 +	NM_064277_in9		50		-99	17103	86	518	11
chrIV 17338559-17338664 -	NM_001027915_in6		55		-99	17103	6	1	1
chrIII 4097207-4097313 -	NM_065421_in1		56		-99	17103	5	11	2
chrV 19772319-19772425 -	NM_075431_in2		56		-99	17103	153	290	12
chrV 15102577-15102697 +	NM_074321_in3		70		-99	17103	9	0	5
chrII 3766211-3766312 -	NM_062244_in5		51		-99	17103	5	0	1
chrIII 10119562-10119680 -	NM_066848_in3		68		-99	17103	27	0	10
chrV 12691907-12692020 +	NM_073767_in5		63		-99	17103	408	270	23
chrV 246830-246934 -	NM_070762_in1		54		-99	17103	5	1	1
chrIII 13412978-13413081 +	NM_001027419_in11		53		-99	17103	11	38	4
chrI 9085459-9085580 -	NM_001129043_in1		71		-99	17103	5	0	2
chrX 4101829-4101932 -	NM_001047814_in1		53		-99	17103	9	0	4
chrII 1151879-1152047 +	NM_001027229_in6		118		-99	17103	66	73	6
chrX 1936689-1936828 +	NM_075952_in14		89		-99	17103	236	72	12
chrX 11647525-11647629 +	NM_001129707_in2		54		-99	17103	6	19	1
chrV 455182-455300 +	NM_070807_in5		68		-99	17103	5	3	2
chrX 14768321-14768430 -	NM_078051_in24		59		-99	17103	107	208	8
chrV 1759581-1759716 +	NM_071098_in8		85		-99	17103	5	0	11
chrIV 10765408-10765522 +	NM_001083245_in1		64		-99	17103	8	3	2
chrIV 9547914-9548016 +	NM_001047519_in4		52		-99	17103	1671	7294	31
chrV 19971154-19971262 -	NM_075466_in1		58		-99	17103	62	120	17
chrII 10871360-10871466 -	NM_063936_in2		56		-99	17103	5	2	1
chrX 5222615-5222782 -	NM_076486_in2		117		-99	17103	8	0	7
chrIII 179804-179913 +	NM_064769_in2		59		-99	17103	9	11	2
chrIV 6321184-6321311 -	NM_068560_in3		77		-99	17103	60	49	4
chrII 4504184-4504332 -	NM_062395_in15		98		-99	17103	8	0	14
chrII 12807747-12807908 +	NM_001136357_in2		111		-99	17103	9	1	2
chrI 5428214-5428316 -	NM_059189_in8		52		-99	17103	5	0	2
chrX 16605048-16605199 -	NM_078285_in5		101		-99	17103	26	2	4
chrIII 13403308-13403448 +	NM_067365_in1		90		-99	17103	47	13	3
chrV 3558683-3558797 +	NM_071599_in3		64		-99	17103	86	64	11
chrV 17070780-17070883 -	NM_074921_in2		53		-99	17103	15	7	2
chrX 11543995-11544130 +	NM_001029275_in8		85		-99	17103	11	0	3
chrV 6590557-6590657 +	NM_072274_in1		50		-99	17103	407	492	17
chrIV 6082457-6082618 -	NM_068512_in4		111		-99	17103	178	0	25
chrV 13385415-13385579 -	NM_073918_in7		114		-99	17103	23	0	10
chrIV 15720756-15720890 +	NM_070482_in8		84		-99	17103	5	0	1
chrIII 12152841-12152960 +	NM_067179_in1		69		-99	17103	45	0	15
chrX 14086970-14087074 +	NM_077944_in5		54		-99	17103	40	1	14
chrII 5179714-5179818 -	NM_170989_in1		54		-99	17103	8	0	2
chrIV 2901337-2901437 +	NM_001028330_in3		50		-99	17103	14	81	5
chrI 10883190-10883294 -	NM_060438_in5		54		-99	17103	43	27	4
chrV 10047539-10047697 +	NM_073179_in5		108		-99	17103	820	261	28
chrI 7533196-7533296 +	NM_001047173_in2		50		-99	17103	9	0	2
chrI 6901955-6902078 -	NM_001025882_in3		73		-99	17103	11	2	12
chrI 13276197-13276299 +	NM_060932_in7		52		-99	17103	21	56	2
chrIV 5879532-5879697 -	NM_068480_in6		115		-99	17103	687	0	56
chrIV 12559790-12559913 +	NM_070003_in3		73		-99	17103	6	0	2
chrIII 434942-435058 +	NM_064798_in1		66		-99	17103	9	0	3
chrV 12308107-12308227 +	NM_073685_in3		70		-99	17103	7	0	3
chrI 3365715-3365823 -	NM_001037893_in5		58		-99	17103	8	3	2
chrX 1692207-1692312 -	NM_075910_in1		55		-99	17103	2014	999	16
chrX 16517251-16517384 +	NM_078277_in6		83		-99	17103	74	11	6
chrV 3572891-3572994 +	NM_071604_in2		53		-99	17103	19	24	4
chrI 7938256-7938408 -	NM_059787_in4		102		-99	17103	369	103	28
chrX 12603610-12603711 +	NM_001029755_in2		51		-99	17103	8	91	1
chrV 20087615-20087720 +	NM_075476_in2		55		-99	17103	17	32	2
chrIII 2968726-2968851 -	NM_065244_in7		75		-99	17103	54	37	7
chrIV 2897145-2897294 -	NM_067868_in1		99		-99	17103	274	36	10
chrV 5430088-5430189 +	NM_072035_in5		51		-99	17103	26	48	5
chrI 2869049-2869219 +	NM_058658_in5		120		-99	17103	9	1	8
chrIV 6302201-6302301 -	NM_182312_in1		50		-99	17103	21	0	13
chrI 3375154-3375273 -	NM_001037894_in1		69		-99	17103	6	15	1
chrV 20502255-20502409 +	NM_075547_in1		104		-99	17103	7	0	1
chrIV 4886679-4886794 +	NM_068263_in7		65		-99	17103	6	937	2
chrII 4935718-4935828 +	NM_062502_in1		60		-99	17103	9	40	3
chrIV 12577177-12577308 +	NM_001047503_in7		81		-99	17103	116	0	36
chrIV 2544525-2544635 +	NM_067817_in4		60		-99	17103	5	0	5
chrI 10469646-10469750 -	NM_060335_in8		54		-99	17103	7	1	1
chrX 11563238-11563341 +	NM_077531_in11		53		-99	17103	5	22	1
chrII 10817690-10817836 -	NM_063928_in7		96		-99	17103	10	0	4
chrII 1933503-1933621 -	NM_061731_in12		68		-99	17103	67	75	6
chrIV 12124317-12124417 +	NM_001083228_in4		50		-99	17103	5	3	1
chrV 5758567-5758672 -	NM_072109_in1		55		-99	17103	5	9	2
chrIV 4185997-4186101 -	NM_068107_in4		54		-99	17103	5	8	5
chrIV 14062566-14062681 -	NM_070292_in4		65		-99	17103	14	3	2
chrIV 4017603-4017711 -	NM_001028245_in5		58		-99	17103	12	35	3
chrX 15449944-15450060 +	NM_078153_in7		66		-99	17103	5	6	1
chrV 18126820-18126929 +	NM_075136_in3		59		-99	17103	11	6	7
chrI 5006751-5006853 +	NM_059097_in1		52		-99	17103	22	106	3
chrI 11890523-11890681 -	NM_060612_in6		108		-99	17103	23	0	4
chrII 1354080-1354202 -	NM_061553_in3		72		-99	17103	27	0	11
chrIV 9249912-9250013 +	NM_069212_in2		51		-99	17103	8	0	4
chrX 230438-230588 +	NM_075640_in1		100		-99	17103	12	0	2
chrV 14160632-14160733 -	NM_074103_in10		51		-99	17103	6	4	1
chrIV 5919248-5919357 +	NM_068488_in7		59		-99	17103	25	57	8
chrII 3813029-3813133 +	NM_062257_in2		54		-99	17103	8	17	2
chrII 3690282-3690443 -	NM_062214_in4		111		-99	17103	19	0	7
chrV 16401113-16401276 +	NM_001028623_in4		113		-99	17103	11	5	2
chrIV 7996503-7996662 -	NM_068938_in4		109		-99	17103	5	1	7
chrIII 186197-186358 +	NM_064771_in2		111		-99	17103	7	4	1
chrX 11624526-11624645 -	NM_077541_in7		69		-99	17103	34	2	3
chrIV 17359887-17359995 +	NM_070693_in6		58		-99	17103	12	0	3
chrI 11629663-11629786 +	NM_060563_in1		73		-99	17103	6	1	2
chrV 3562631-3562734 -	NM_071601_in5		53		-99	17103	14	20	4
chrIII 1884764-1884906 -	NM_065070_in1		92		-99	17103	5	1	2
chrII 5533460-5533571 -	NM_062661_in2		61		-99	17103	13	0	11
chrI 9142006-9142111 -	NM_060051_in1		55		-99	17103	5	2	1
chrV 18813277-18813384 +	NM_075275_in5		57		-99	17103	12	0	12
chrIII 8497769-8497872 +	NM_001136361_in4		53		-99	17103	20	0	7
chrII 2812534-2812689 +	NM_061968_in7		105		-99	17103	11	0	8
chrIV 8599398-8599563 -	NM_069066_in3		115		-99	17103	12	3	3
chrI 11549930-11550077 -	NM_060545_in38		97		-99	17103	50	0	11
chrIII 7231250-7231373 -	NM_066193_in1		73		-99	17103	18	4	3
chrV 20818217-20818372 -	NM_075617_in9		105		-99	17103	8	1	1
chrI 114398-114568 +	NM_058277_in2		120		-99	17103	10	2	1
chrII 5649753-5649858 +	NM_062702_in1		55		-99	17103	10	3	4
chrI 3999500-3999613 -	NM_001026325_in1		63		-99	17103	10	6	2
chrX 14802967-14803135 +	NM_078054_in7		118		-99	17103	16	0	23
chrIV 15646213-15646314 -	NM_070481_in2		51		-99	17103	12	15	3
chrV 20383269-20383425 +	NM_075528_in2		106		-99	17103	15	1	3
chrV 15761234-15761342 -	NM_074526_in3		58		-99	17103	13	0	9
chrIII 11591026-11591139 +	NM_067098_in2		63		-99	17103	15	10	2
chrV 20448436-20448543 -	NM_075533_in1		57		-99	17103	6	2	2
chrV 5996548-5996649 +	NM_072155_in1		51		-99	17103	8	1	11
chrII 10787470-10787588 +	NM_063920_in2		68		-99	17103	43	1	18
chrV 250170-250332 -	NM_070762_in8		112		-99	17103	30	2	2
chrIV 3599696-3599804 -	NM_067980_in1		58		-99	17103	9	10	2
chrV 12126834-12126954 -	NM_073642_in11		70		-99	17103	6	0	5
chrIV 11820832-11820984 -	NM_069834_in2		102		-99	17103	17	22	3
chrIV 9547749-9547860 +	NM_001047519_in3		61		-99	17103	1133	217	33
chrX 269638-269780 -	NM_182463_in1		92		-99	17103	8	3	5
chrIV 4690376-4690515 +	NM_068214_in4		89		-99	17103	7	0	2
chrV 5087010-5087117 -	NM_071961_in2		57		-99	17103	5	0	1
chrII 8026497-8026601 -	NM_063278_in6		54		-99	17103	7	1	3
chrI 9017696-9017808 +	NM_060024_in3		62		-99	17103	10	0	13
chrV 19771626-19771732 -	NM_075431_in1		56		-99	17103	69	189	6
chrIV 5485866-5485969 -	NM_068418_in4		53		-99	17103	9	44	3
chrI 13959394-13959496 +	NM_061035_in7		52		-99	17103	201	267	14
chrV 9037549-9037670 +	NM_072940_in6		71		-99	17103	51	0	11
chrIV 13455668-13455787 +	NM_001028287_in2		69		-99	17103	12	12	3
chrX 4099906-4100008 -	NM_001029714_in16		52		-99	17103	5	0	3
chrV 12690614-12690719 +	NM_073767_in1		55		-99	17103	29	39	4
chrIV 5314301-5314452 +	NM_171336_in3		101		-99	17103	5	6	1
chrI 8172972-8173072 +	NM_001026360_in3		50		-99	17103	7	3	3
chrIV 13432763-13432891 -	NM_001047507_in3		78		-99	17103	44	64	11
chrV 20840620-20840721 -	NM_075624_in6		51		-99	17103	22	28	2
chrIII 6952566-6952700 +	NM_066115_in12		84		-99	17103	16	3	7
chrIV 1633823-1633965 +	NM_067712_in1		92		-99	17103	5	1	6
chrIII 7390354-7390464 +	NM_066235_in6		60		-99	17103	6	0	4
chrIV 15291041-15291190 -	NM_070442_in1		99		-99	17103	36	3	12
chrII 2937724-2937870 -	NM_062003_in6		96		-99	17103	8	0	4
chrIV 14512286-14512399 -	NM_070356_in3		63		-99	17103	8	1	6
chrI 11847420-11847529 +	NM_060606_in7		59		-99	17103	7	4	2
chrII 13637285-13637400 -	NM_064467_in1		65		-99	17103	5	4	1
chrI 11625512-11625616 +	NM_060561_in7		54		-99	17103	8	7	1
chrII 6113127-6113271 -	NM_062823_in10		94		-99	17103	8	13	2
chrIV 14350367-14350467 -	NM_070341_in10		50		-99	17103	880	8	33
chrX 59343-59494 +	NM_171609_in3		101		-99	17103	11	10	3
chrI 13535081-13535190 +	NM_060973_in2		59		-99	17103	25	35	3
chrV 2163574-2163677 -	NM_071186_in6		53		-99	17103	16	0	9
chrV 15519548-15519674 -	NM_074460_in11		76		-99	17103	42	10	3
chrIV 7551846-7552010 -	NM_068822_in1		114		-99	17103	182	0	24
chrIV 17338689-17338837 -	NM_001027915_in7		98		-99	17103	11	4	1
chrIV 871688-871855 +	NM_067602_in20		117		-99	17103	20	10	6
chrI 142646-142753 +	NM_058283_in17		57		-99	17103	5	2	2
chrIII 11316668-11316818 -	NM_067054_in5		100		-99	17103	14	3	11
chrV 14422898-14423009 -	NM_074171_in1		61		-99	17103	20	2	6
chrI 7892579-7892700 +	NM_059778_in7		71		-99	17103	36	16	6
chrIII 1515580-1515749 -	NM_065013_in5		119		-99	17103	107	0	24
chrII 1896724-1896825 +	NM_061714_in3		51		-99	17103	27	32	3
chrV 20727925-20728032 +	NM_075602_in2		57		-99	17103	52	66	10
chrIII 5263136-5263306 -	NM_065719_in4		120		-99	17103	17	0	2
chrV 19786175-19786275 +	NM_075436_in2		50		-99	17103	19	1	3
chrIII 6382615-6382737 +	NM_065996_in2		72		-99	17103	7	0	2
chrIII 7972979-7973147 -	NM_066336_in2		118		-99	17103	5	10	2
chrX 4855156-4855314 -	NM_001029472_in3		108		-99	17103	6	6	1
chrI 7352059-7352170 -	NM_059677_in7		61		-99	17103	10	23	4
chrIII 3492334-3492501 -	NM_065318_in8		117		-99	17103	242	1	5
chrIV 4330094-4330205 +	NM_068140_in9		61		-99	17103	9	0	5
chrX 16521486-16521592 +	NM_078278_in10		56		-99	17103	152	897	10
chrII 2154678-2154779 +	NM_061800_in3		51		-99	17103	139	168	16
chrII 2535906-2536007 +	NM_061890_in3		51		-99	17103	17	75	2
chrX 15933589-15933746 -	NM_078215_in11		107		-99	17103	22	59	2
chrI 13952810-13952915 +	NM_061034_in2		55		-99	17103	5	14	1
chrI 216252-216355 +	NM_058294_in2		53		-99	17103	9	44	3
chrIV 15647911-15648021 -	NM_070481_in6		60		-99	17103	115	109	14
chrI 12679405-12679562 +	NM_060808_in2		107		-99	17103	21	0	7
chrV 18836820-18836988 -	NM_075278_in5		118		-99	17103	261	0	48
chrII 10451140-10451246 +	NM_063845_in2		56		-99	17103	6	1	4
chrI 14198652-14198754 -	NM_001026708_in1		52		-99	17103	5	7	5
chrI 13101681-13101791 +	NM_001129064_in1		60		-99	17103	94	0	35
chrI 13412544-13412687 -	NM_060959_in1		93		-99	17103	34	12	3
chrIV 6224019-6224177 +	NM_068535_in10		108		-99	17103	10	17	4
chrIV 1207617-1207722 -	NM_067653_in1		55		-99	17103	6	12	2
chrIII 9947443-9947552 +	NM_066809_in1		59		-99	17103	13	0	30
chrII 1947259-1947359 -	NM_061735_in10		50		-99	17103	112	280	26
chrIV 3879472-3879607 -	NM_068029_in1		85		-99	17103	154	12	13
chrIV 860874-860974 +	NM_067602_in5		50		-99	17103	5	10	1
chrX 15953003-15953153 +	NM_078216_in3		100		-99	17103	49	17	4
chrIII 13747526-13747637 -	NM_067436_in1		61		-99	17103	8	0	3
chrIV 12707677-12707846 -	NM_001047450_in2		119		-99	17103	23	12	2
chrIII 4436132-4436285 -	NM_065501_in5		103		-99	17103	5	0	2
chrII 1905512-1905640 +	NM_061717_in1		78		-99	17103	49	72	3
chrX 4201976-4202080 -	NM_076314_in2		54		-99	17103	104	241	11
chrIV 14530526-14530628 +	NM_070360_in6		52		-99	17103	7	11	2
chrII 1932490-1932595 -	NM_061731_in7		55		-99	17103	185	685	13
chrI 3273255-3273392 -	NM_001129055_in4		87		-99	17103	5	8	1
chrV 4764325-4764426 -	NM_071880_in1		51		-99	17103	10	21	2
chrII 1909122-1909222 +	NM_061718_in4		50		-99	17103	21	17	4
chrV 8873314-8873458 +	NM_072870_in3		94		-99	17103	8	1	5
chrI 5190433-5190554 +	NM_059142_in1		71		-99	17103	10	1	13
chrV 20832403-20832505 +	NM_075620_in7		52		-99	17103	43	125	7
chrIV 13631723-13631846 +	NM_070229_in2		73		-99	17103	20	43	2
chrIII 12028594-12028700 -	NM_001027783_in3		56		-99	17103	8	0	5
chrX 137029-137177 +	NM_075666_in4		98		-99	17103	430	433	24
chrV 20515875-20516043 -	NM_075552_in1		118		-99	17103	37	5	3
chrII 690222-690322 +	NM_061392_in1		50		-99	17103	5	1	2
chrIV 4717312-4717433 +	NM_068220_in2		71		-99	17103	6	0	5
chrX 15113015-15113124 -	NM_078113_in8		59		-99	17103	8	7	1
chrI 2037304-2037423 -	NM_058517_in3		69		-99	17103	29	234	17
chrV 18959784-18959918 -	NM_171561_in3		84		-99	17103	96	21	10
chrIV 5932212-5932369 +	NM_068489_in3		107		-99	17103	7	0	3
chrIII 13481846-13482012 -	NM_067388_in4		116		-99	17103	6	6	1
chrIII 10448049-10448158 -	NM_001027460_in5		59		-99	17103	7	2	1
chrIV 2899435-2899562 -	NM_067868_in8		77		-99	17103	136	99	12
chrIV 5606402-5606568 +	NM_001027977_in4		116		-99	17103	552	1	46
chrV 20676883-20676984 +	NM_075593_in1		51		-99	17103	186	59	12
chrX 11232972-11233140 -	NM_077476_in9		118		-99	17103	6	0	3
chrV 18940422-18940591 +	NM_075290_in1		119		-99	17103	8	1	4
chrII 1459250-1459380 -	NM_001027289_in1		80		-99	17103	7	12	1
chrII 10643228-10643348 +	NM_063895_in16		70		-99	17103	9	9	2
chrV 16923609-16923775 +	NM_074877_in5		116		-99	17103	77	8	4
chrIV 2399258-2399392 -	NM_067799_in3		84		-99	17103	7	7	1
chrIV 6166629-6166757 -	NM_171352_in18		78		-99	17103	717	0	32
chrV 18305277-18305415 -	NM_001029085_in3		88		-99	17103	10	4	7
chrIII 3509634-3509753 -	NM_001027516_in11		69		-99	17103	5	1	6
chrI 3367876-3367976 -	NM_058749_in1		50		-99	17103	6	6	2
chrV 20638579-20638682 +	NM_075588_in3		53		-99	17103	49	70	10
chrIV 16831860-16831964 +	NM_070595_in1		54		-99	17103	7	12	1
chrIII 13778286-13778445 +	NM_067446_in6		109		-99	17103	24	12	3
chrIV 771156-771289 -	NM_067584_in5		83		-99	17103	7	26	2
chrIII 2438399-2438544 +	NM_065155_in6		95		-99	17103	434	334	14
chrI 1156766-1156900 +	NM_171832_in1		84		-99	17103	84	41	3
chrII 4754961-4755105 +	NM_062450_in5		94		-99	17103	43	0	20
chrX 11536557-11536676 +	NM_077526_in1		69		-99	17103	7	3	1
chrV 4832897-4832998 -	NM_001129403_in2		51		-99	17103	10	5	3
chrIV 10003293-10003456 -	NM_069402_in6		113		-99	17103	5	15	2
chrV 18641991-18642117 +	NM_075238_in4		76		-99	17103	5	0	11
chrIV 651437-651544 +	NM_067561_in4		57		-99	17103	5	1	1
chrIII 11027261-11027361 -	NM_067018_in1		50		-99	17103	76	134	11
chrI 11467001-11467108 +	NM_060528_in4		57		-99	17103	5	10	2
chrX 239854-240004 +	NM_001026210_in1		100		-99	17103	12	0	2
chrIII 10436694-10436802 +	NM_066901_in1		58		-99	17103	8	1	2
chrIII 11941148-11941280 -	NM_067156_in2		82		-99	17103	12	22	4
chrIII 2802968-2803110 +	NM_001047422_in2		92		-99	17103	79	51	8
chrIV 8399293-8399393 +	NM_069027_in2		50		-99	17103	5	12	1
chrV 20768114-20768218 -	NM_001136424_in1		54		-99	17103	15	55	3
chrI 7303843-7303965 -	NM_059664_in3		72		-99	17103	16	1	14
chrIII 10496333-10496464 +	NM_066912_in13		81		-99	17103	9	0	4
chrI 8644568-8644717 +	NM_059941_in1		99		-99	17103	10	0	5
chrX 2958806-2958909 +	NM_171646_in2		53		-99	17103	10	6	2
chrIII 5736811-5736964 +	NM_065839_in15		103		-99	17103	5	0	3
chrIV 9795468-9795585 -	NM_069348_in10		67		-99	17103	34	0	9
chrII 8085884-8086003 -	NM_063295_in8		69		-99	17103	10	2	15
chrIII 12273226-12273334 -	NM_067195_in14		58		-99	17103	5	0	2
chrII 7816533-7816647 +	NM_063241_in1		64		-99	17103	22	6	4
chrI 539986-540091 +	NM_171831_in6		55		-99	17103	5	1	1
chrI 491702-491863 +	NM_001026495_in4		111		-99	17103	6	1	2
chrI 14996796-14996960 +	NM_061212_in9		114		-99	17103	5	1	1
chrII 2683486-2683587 -	NM_061931_in1		51		-99	17103	6	5	2
chrX 411054-411171 -	NM_075697_in8		67		-99	17103	5	1	2
chrX 4207320-4207420 -	NM_076316_in3		50		-99	17103	14	41	6
chrX 131639-131751 +	NM_075667_in2		62		-99	17103	11	8	6
chrI 2050994-2051143 -	NM_058520_in2		99		-99	17103	6	2	2
chrV 17888732-17888833 -	NM_075108_in9		51		-99	17103	7	7	1
chrV 6966733-6966849 -	NM_072359_in1		66		-99	17103	10	1	3
chrV 12648100-12648203 -	NM_073760_in5		53		-99	17103	16	11	2
chrV 5583555-5583655 -	NM_072071_in1		50		-99	17103	6	3	1
chrII 5102227-5102366 +	NM_062543_in1		89		-99	17103	5	0	4
chrIV 10866181-10866350 -	NM_069614_in2		119		-99	17103	10	11	1
chrII 4905171-4905279 +	NM_170983_in1		58		-99	17103	6	1	5
chrI 10356367-10356532 +	NM_001026680_in1		115		-99	17103	5	0	8
chrI 3148214-3148319 +	NM_058708_in1		55		-99	17103	9	2	2
chrII 11454990-11455092 +	NM_064041_in4		52		-99	17103	5	2	1
chrX 7824088-7824240 +	NM_182444_in2		102		-99	17103	112	23	6
chrI 12642096-12642262 -	NM_060799_in5		116		-99	17103	19	44	2
chrII 1937347-1937470 -	NM_001027348_in1		73		-99	17103	430	579	18
chrIV 10630987-10631144 -	NM_001083222_in2		107		-99	17103	29	2	15
chrV 20349432-20349580 +	NM_075521_in4		98		-99	17103	6	0	1
chrX 3972388-3972548 -	NM_076286_in5		110		-99	17103	8	1	1
chrIII 954509-954615 -	NM_001129248_in1		56		-99	17103	6	15	2
chrV 20662823-20662927 +	NM_075592_in2		54		-99	17103	13	37	2
chrII 5813458-5813558 -	NM_062750_in3		50		-99	17103	9	0	11
chrI 4959527-4959635 +	NM_059086_in1		58		-99	17103	8	1	2
chrV 8846632-8846757 -	NM_072889_in2		75		-99	17103	52	9	4
chrIV 1046057-1046162 +	NM_067628_in1		55		-99	17103	67	32	7
chrV 20436058-20436164 -	NM_075531_in2		56		-99	17103	41	196	11
chrI 6072630-6072782 -	NM_059352_in5		102		-99	17103	7	1	4
chrIII 11027470-11027573 -	NM_067018_in2		53		-99	17103	49	74	11
chrV 20497089-20497208 -	NM_075545_in2		69		-99	17103	56	95	6
chrX 16258888-16258995 -	NM_001047834_in7		57		-99	17103	41	96	5
chrII 1937911-1938015 -	NM_001027347_in2		54		-99	17103	37	81	4
chrIV 13155667-13155773 +	NM_070130_in3		56		-99	17103	5	0	4
chrV 9503481-9503646 +	NM_073048_in5		115		-99	17103	2668	0	70
chrII 14382350-14382513 +	NM_064590_in4		113		-99	17103	14	0	7
chrV 18660605-18660710 -	NM_075242_in4		55		-99	17103	5	1	7
chrIV 12558725-12558879 -	NM_070002_in7		104		-99	17103	8	6	1
chrV 7701212-7701361 -	NM_072593_in2		99		-99	17103	5	3	1
chrIV 10853500-10853621 -	NM_069610_in4		71		-99	17103	8	1	5
chrIV 15049396-15049505 -	NM_070418_in1		59		-99	17103	101	124	8
chrIV 1551491-1551631 +	NM_067694_in3		90		-99	17103	54	14	4
chrV 8685606-8685706 +	NM_072836_in7		50		-99	17103	9	12	3
chrI 9848555-9848672 +	NM_060207_in3		67		-99	17103	7	0	4
chrV 8887363-8887481 -	NM_072873_in1		68		-99	17103	178	664	12
chrII 2045034-2045136 -	NM_061762_in2		52		-99	17103	16	20	2
chrV 2009641-2009743 +	NM_071147_in3		52		-99	17103	10	1	1
chrV 6716897-6717001 -	NM_072301_in1		54		-99	17103	12	19	3
chrI 4026776-4026892 -	NM_001026330_in18		66		-99	17103	18	0	12
chrI 332740-332871 +	NM_058318_in1		81		-99	17103	212	213	14
chrV 19723015-19723120 +	NM_075417_in1		55		-99	17103	253	663	26
chrX 135912-136060 -	NM_075666_in1		98		-99	17103	428	431	24
chrX 16356605-16356708 +	NM_001029217_in5		53		-99	17103	8	2	2
chrIII 4060698-4060844 +	NM_065412_in1		96		-99	17103	17	12	2
chrII 1152183-1152351 +	NM_001027229_in7		118		-99	17103	142	137	12
chrIII 8048773-8048934 -	NM_066358_in2		111		-99	17103	56	32	2
chrI 13275313-13275439 +	NM_060932_in4		76		-99	17103	27	8	3
chrV 1455127-1455241 +	NM_071019_in1		64		-99	17103	691	3	41
chrIV 9499278-9499389 +	NM_069278_in3		61		-99	17103	12	1	4
chrV 15593612-15593712 -	NM_074475_in1		50		-99	17103	318	820	27
chrV 20607959-20608074 +	NM_075576_in7		65		-99	17103	36	24	3
chrI 4458112-4458218 +	NM_058974_in4		56		-99	17103	30	105	10
chrII 1955433-1955587 -	NM_061737_in5		104		-99	17103	65	22	6
chrX 14603060-14603197 +	NM_001029300_in1		87		-99	17103	48	2	16
chrIII 1982297-1982466 -	NM_065086_in4		119		-99	17103	15	2	5
chrI 14669514-14669623 +	NM_001026533_in4		59		-99	17103	21	1	11
chrX 16842456-16842622 +	NM_078319_in6		116		-99	17103	13	5	2
chrV 20458366-20458508 -	NM_075535_in10		92		-99	17103	39	52	6
chrV 3572778-3572885 +	NM_071604_in1		57		-99	17103	164	475	11
chrII 1902364-1902484 +	NM_061716_in1		70		-99	17103	5	23	1
chrI 8282236-8282362 +	NM_059852_in1		76		-99	17103	27	18	6
chrIII 2724951-2725053 -	NM_065205_in6		52		-99	17103	13	2	4
chrX 4214512-4214615 -	NM_171663_in7		53		-99	17103	5	9	2
chrIII 4793593-4793696 +	NM_065587_in3		53		-99	17103	5	3	7
chrII 5318597-5318703 +	NM_062595_in4		56		-99	17103	20	9	4
chrIV 13099601-13099707 +	NM_001026104_in4		56		-99	17103	26	0	3
chrV 2252870-2252975 -	NM_071218_in1		55		-99	17103	10	0	4
chrII 2684114-2684282 -	NM_061931_in4		118		-99	17103	9	0	5
chrX 13690135-13690235 +	NM_077890_in7		50		-99	17103	13	127	3
chrIV 5212029-5212152 -	NM_068341_in12		73		-99	17103	267	0	10
chrIII 12727169-12727288 +	NM_067253_in9		69		-99	17103	86	1	39
chrX 13507653-13507757 +	NM_077854_in1		54		-99	17103	6	4	2
chrX 4515176-4515285 +	NM_001029197_in3		59		-99	17103	7	3	11
chrIV 1549323-1549487 +	NM_067693_in2		114		-99	17103	60	67	3
chrV 10567206-10567337 +	NM_073309_in6		81		-99	17103	65	22	5
chrIII 13431720-13431824 +	NM_067372_in7		54		-99	17103	18	21	3
chrV 6508866-6509004 -	NM_171473_in1		88		-99	17103	7	1	1
chrI 10714656-10714756 -	NM_001047164_in3		50		-99	17103	5	0	7
chrI 13337527-13337627 -	NM_060946_in1		50		-99	17103	5	3	2
chrV 16922463-16922609 +	NM_074877_in1		96		-99	17103	30	21	3
chrI 12417778-12417878 +	NM_060748_in3		50		-99	17103	5	0	1
chrIV 3580557-3580725 +	NM_001028269_in3		118		-99	17103	7	1	1
chrII 2332783-2332945 +	NM_061843_in1		112		-99	17103	8	0	16
chrIV 3514167-3514281 -	NM_067963_in5		64		-99	17103	8	6	11
chrII 1263701-1263804 -	NM_061534_in3		53		-99	17103	16	9	3
chrII 1449935-1450065 +	NM_001027289_in4		80		-99	17103	7	11	1
chrX 3109529-3109636 -	NM_001029614_in6		57		-99	17103	19	0	13
chrIV 14204029-14204169 +	NM_070326_in3		90		-99	17103	5	1	1
chrV 13665593-13665694 +	NM_073982_in1		51		-99	17103	5	6	1
chrV 18564065-18564171 -	NM_075230_in3		56		-99	17103	17	9	10
chrIV 13431637-13431783 -	NM_001047506_in1		96		-99	17103	1112	404	28
chrI 12283337-12283443 +	NM_060701_in1		56		-99	17103	290	0	13
chrV 10775445-10775608 -	NM_073351_in3		113		-99	17103	15	14	2
chrII 8599808-8599913 +	NM_063420_in1		55		-99	17103	13	44	2
chrI 8376235-8376396 +	NM_059871_in3		111		-99	17103	14	1	6
chrV 745148-745268 +	NM_070911_in4		70		-99	17103	12	1	2
chrI 5458556-5458705 -	NM_059201_in7		99		-99	17103	6	1	1
chrV 18963882-18963989 -	NM_171563_in3		57		-99	17103	18	48	3
chrX 16521683-16521831 +	NM_078278_in11		98		-99	17103	48	9	13
chrX 14768662-14768763 -	NM_078051_in25		51		-99	17103	6	6	1
chrI 719415-719525 -	NM_058372_in3		60		-99	17103	57	0	20
chrII 1852862-1852966 +	NM_061695_in1		54		-99	17103	5	3	2
chrI 4185057-4185212 +	NM_170849_in1		105		-99	17103	7	17	1
chrII 10386810-10386928 +	NM_063834_in4		68		-99	17103	5	0	7
chrX 61297-61399 -	NM_075676_in1		52		-99	17103	5	9	1
chrI 13842222-13842322 -	NM_061021_in2		50		-99	17103	12	22	3
chrII 10929603-10929705 +	NM_063952_in6		52		-99	17103	5	4	1
chrI 5019865-5019965 -	NM_059100_in4		50		-99	17103	70	10	21
chrII 10873108-10873208 +	NM_063937_in3		50		-99	17103	25	0	6
chrII 3449675-3449817 +	NM_062144_in2		92		-99	17103	14	0	8
chrII 13036427-13036532 -	NM_064371_in1		55		-99	17103	290	470	18
chrII 458920-459025 -	NM_061338_in6		55		-99	17103	7	2	4
chrV 11562974-11563116 +	NM_001028725_in1		92		-99	17103	5	0	2
chrX 14104343-14104459 +	NM_077948_in7		66		-99	17103	5	6	1
chrI 12640252-12640393 +	NM_060798_in5		91		-99	17103	31	7	2
chrIII 13420978-13421119 +	NM_001027420_in5		91		-99	17103	7	2	2
chrV 20360842-20360946 +	NM_075522_in13		54		-99	17103	14	10	3
chrX 807129-807233 -	NM_075757_in1		54		-99	17103	11	22	2
chrIII 429767-429869 +	NM_064797_in3		52		-99	17103	6	2	1
chrV 10451385-10451486 -	NM_182330_in1		51		-99	17103	6	11	4
chrIV 9547290-9547438 +	NM_001047519_in1		98		-99	17103	47	46	5
chrI 8024244-8024392 -	NM_059806_in5		98		-99	17103	5	1	1
chrV 5191486-5191599 -	NM_071991_in1		63		-99	17103	119	351	6
chrIII 2792353-2792465 +	NM_001038294_in4		62		-99	17103	31	0	34
chrV 12371782-12371914 +	NM_073697_in1		82		-99	17103	19	7	2
chrIV 6483323-6483423 -	NM_068587_in1		50		-99	17103	1036	215	39
chrI 7156077-7156245 -	NM_059623_in8		118		-99	17103	30	0	16
chrIII 2731390-2731512 +	NM_065206_in8		72		-99	17103	171	368	9
chrI 11584523-11584630 -	NM_060554_in9		57		-99	17103	41	0	24
chrV 19985223-19985329 +	NM_001029101_in2		56		-99	17103	14	3	3
chrII 1510578-1510746 -	NM_061582_in1		118		-99	17103	8	6	2
chrII 12055733-12055843 +	NM_064165_in4		60		-99	17103	21	76	3
chrII 11674723-11674827 -	NM_001026860_in20		54		-99	17103	9	1	4
chrIII 6578158-6578294 -	NM_066050_in1		86		-99	17103	7	6	2
chrX 2317935-2318096 -	NM_171632_in6		111		-99	17103	12	3	3
chrV 6774403-6774508 -	NM_072314_in1		55		-99	17103	8	9	2
chrV 7807609-7807709 +	NM_171484_in4		50		-99	17103	39	3	15
chrI 5374272-5374386 -	NM_182025_in2		64		-99	17103	6	14	2
chrX 3012474-3012574 -	NM_076113_in2		50		-99	17103	8	32	2
chrIII 1572669-1572814 +	NM_001027757_in4		95		-99	17103	7	0	4
chrII 15101177-15101279 +	NM_064705_in9		52		-99	17103	6	1	3
chrIV 8024620-8024770 -	NM_001026158_in4		100		-99	17103	8	0	8
chrX 13459698-13459801 -	NM_077843_in12		53		-99	17103	185	26	13
chrIII 974180-974300 -	NM_064908_in3		70		-99	17103	30	10	3
chrIII 6932065-6932184 +	NM_066109_in1		69		-99	17103	6	2	1
chrV 11285131-11285300 +	NM_073463_in4		119		-99	17103	5	3	2
chrI 13959135-13959263 +	NM_061035_in6		78		-99	17103	58	203	6
chrIII 11230563-11230719 -	NM_171231_in5		106		-99	17103	14	0	3
chrIV 12506949-12507053 +	NM_069993_in4		54		-99	17103	8	15	1
chrII 7065895-7065996 +	NM_063051_in2		51		-99	17103	12	1	2
chrV 7714509-7714618 +	NM_072596_in2		59		-99	17103	14	1	9
chrI 11811764-11811922 -	NM_060600_in5		108		-99	17103	6	5	2
chrII 3791180-3791280 +	NM_062250_in2		50		-99	17103	13	2	9
chrIV 12707945-12708048 -	NM_001047450_in3		53		-99	17103	8	2	1
chrX 14984611-14984716 +	NM_078089_in7		55		-99	17103	5	2	12
chrIV 14110488-14110626 -	NM_070303_in1		88		-99	17103	5	1	4
chrV 19773699-19773807 -	NM_001047684_in3		58		-99	17103	52	23	8
chrX 16519346-16519451 +	NM_078278_in3		55		-99	17103	12	13	4
chrX 11691188-11691355 +	NM_077554_in1		117		-99	17103	6	2	1
chrII 11759671-11759830 +	NM_064109_in1		109		-99	17103	25	4	6
chrI 6743924-6744027 -	NM_059531_in2		53		-99	17103	21	2	12
chrIV 2389578-2389684 +	NM_067797_in1		56		-99	17103	27	35	3
chrIV 9728786-9728886 +	NM_069330_in1		50		-99	17103	6	2	11
chrII 3592387-3592543 -	NM_062189_in2		106		-99	17103	5	9	2
chrIII 9988146-9988288 -	NM_066814_in4		92		-99	17103	7	3	1
chrX 211538-211638 +	NM_075649_in1		50		-99	17103	16	44	5
chrX 4973062-4973227 -	NM_076448_in1		115		-99	17103	6	2	3
chrIV 276572-276674 +	NM_067495_in7		52		-99	17103	13	21	2
chrI 12892007-12892114 +	NM_060851_in14		57		-99	17103	13	9	2
chrII 4235344-4235488 -	NM_001129115_in1		94		-99	17103	7	2	2
chrI 8948843-8948968 +	NM_060008_in1		75		-99	17103	111	144	8
chrIV 4181560-4181681 +	NM_068106_in1		71		-99	17103	6	0	5
chrV 20843273-20843376 -	NM_075626_in1		53		-99	17103	6	3	1
chrIV 4137058-4137195 -	NM_068089_in1		87		-99	17103	14	4	3
chrIII 168137-168258 -	NM_064765_in2		71		-99	17103	7	0	4
chrI 4665230-4665371 +	NM_059021_in3		91		-99	17103	8	0	2
chrI 1339542-1339656 +	NM_001083139_in3		64		-99	17103	11	1	6
chrIII 1606531-1606696 +	NM_065025_in2		115		-99	17103	34	4	6
chrI 7395249-7395377 -	NM_059687_in9		78		-99	17103	13	1	4
chrII 3359395-3359562 +	NM_062116_in1		117		-99	17103	5	4	1
chrII 1851415-1851528 +	NM_061694_in1		63		-99	17103	5	2	1
chrII 589962-590069 +	NM_061363_in3		57		-99	17103	10	8	2
chrX 11446036-11446136 -	NM_077514_in5		50		-99	17103	8	37	4
chrIII 2839014-2839179 -	NM_065226_in3		115		-99	17103	8	0	4
chrIV 6275472-6275631 -	NM_001028211_in11		109		-99	17103	224	1	38
chrI 8638745-8638848 -	NM_059939_in1		53		-99	17103	16	185	5
chrV 18811489-18811649 +	NM_075275_in2		110		-99	17103	5	0	4
chrV 4833075-4833184 -	NM_001129403_in3		59		-99	17103	5	9	1
chrIII 2400765-2400867 -	NM_065147_in4		52		-99	17103	5	12	2
chrV 2184548-2184650 +	NM_071193_in3		52		-99	17103	8	26	2
chrI 12783453-12783603 +	NM_001026555_in1		100		-99	17103	15	17	3
chrIII 13463744-13463897 +	NM_001027630_in4		103		-99	17103	426	115	8
chrV 14685093-14685196 -	NM_074224_in5		53		-99	17103	5	11	2
chrII 8565763-8565864 -	NM_063407_in6		51		-99	17103	11	3	8
chrIII 3835624-3835728 +	NM_065375_in3		54		-99	17103	8	0	8
chrX 14990722-14990822 -	NM_078090_in8		50		-99	17103	7	4	2
chrV 12844610-12844778 -	NM_073813_in7		118		-99	17103	8	0	14
chrV 14643725-14643890 -	NM_074218_in2		115		-99	17103	10	2	9
chrII 2203675-2203840 -	NM_061811_in11		115		-99	17103	41	0	14
chrX 15748662-15748792 -	NM_078190_in2		80		-99	17103	6	33	4
chrII 1132116-1132253 +	NM_061518_in7		87		-99	17103	6	1	3
chrV 9427149-9427268 -	NM_073038_in2		69		-99	17103	12	9	2
chrIV 2669133-2669290 +	NM_171292_in7		107		-99	17103	15	6	2
chrX 14238788-14238911 +	NM_077972_in2		73		-99	17103	12	1	12
chrII 498392-498544 +	NM_061346_in7		102		-99	17103	3148	44	78
chrX 239037-239179 -	NM_001026208_in7		92		-99	17103	5	4	1
chrIV 13906262-13906416 -	NM_070275_in1		104		-99	17103	28	5	6
chrX 12862721-12862821 -	NM_077742_in2		50		-99	17103	6	13	1
chrI 3683637-3683746 -	NM_058798_in1		59		-99	17103	20	0	17
chrX 15235215-15235341 -	NM_078128_in1		76		-99	17103	10	0	14
chrI 2037896-2038000 -	NM_058517_in6		54		-99	17103	5	13	5
chrV 20722392-20722494 -	NM_182370_in12		52		-99	17103	14	23	2
chrIV 12161580-12161680 +	NM_069909_in8		50		-99	17103	9	1	4
chrV 20855079-20855192 -	NM_075629_in2		63		-99	17103	57	32	8
chrII 9706171-9706278 -	NM_063692_in10		57		-99	17103	9	20	2
chrI 3590173-3590317 -	NM_170844_in12		94		-99	17103	9	0	5
chrV 18953224-18953370 -	NM_075291_in1		96		-99	17103	9	0	4
chrI 2084393-2084505 +	NM_058530_in6		62		-99	17103	7	0	3
chrIV 8692339-8692504 +	NM_001027947_in2		115		-99	17103	7	1	2
chrX 11444625-11444778 -	NM_077514_in1		103		-99	17103	32	40	2
chrII 6897101-6897229 -	NM_063009_in9		78		-99	17103	5	0	7
chrIII 5704190-5704344 -	NM_001025952_in1		104		-99	17103	9	2	1
chrIII 5953727-5953840 -	NM_065894_in1		63		-99	17103	5	1	1
chrIII 3630321-3630424 -	NM_065335_in5		53		-99	17103	15	18	4
chrX 4206984-4207112 -	NM_076316_in1		78		-99	17103	77	88	13
chrX 7318425-7318575 -	NM_076836_in1		100		-99	17103	14	19	2
chrX 12581344-12581508 +	NM_077702_in4		114		-99	17103	11	0	10
chrII 1945198-1945340 -	NM_061735_in4		92		-99	17103	33	38	3
chrIII 2967225-2967374 -	NM_065244_in1		99		-99	17103	192	19	10
chrV 6706798-6706904 -	NM_001029013_in3		56		-99	17103	5	9	1
chrX 13689918-13690018 +	NM_077890_in6		50		-99	17103	18	59	4
chrII 3038947-3039111 +	NM_062028_in1		114		-99	17103	8	2	10
chrI 10185209-10185309 -	NM_060281_in2		50		-99	17103	69	86	5
chrV 7575803-7575907 +	NM_072552_in1		54		-99	17103	5	4	5
chrX 4201795-4201918 -	NM_076314_in1		73		-99	17103	151	111	14
chrX 1435197-1435307 +	NM_075870_in1		60		-99	17103	20	119	10
chrIV 4390428-4390579 -	NM_171904_in5		101		-99	17103	12	12	3
chrV 6428681-6428789 -	NM_171472_in4		58		-99	17103	5	1	3
chrX 17714549-17714680 +	NM_078462_in2		81		-99	17103	8	4	3
chrI 9107191-9107323 -	NM_001026506_in11		82		-99	17103	5	5	1
chrV 19539281-19539402 -	NM_001047727_in7		71		-99	17103	16	0	8
chrX 3673346-3673455 -	NM_001129622_in2		59		-99	17103	8	9	2
chrII 2276660-2276820 -	NM_061824_in10		110		-99	17103	5	2	3
chrI 10657556-10657661 -	NM_060389_in7		55		-99	17103	8	3	7
chrII 1508641-1508769 +	NM_061580_in7		78		-99	17103	5	3	3
chrIII 2620094-2620199 +	NM_065190_in1		55		-99	17103	12	4	4
chrIII 12309972-12310079 +	NM_067198_in4		57		-99	17103	7	5	3
chrII 15136711-15136827 +	NM_064710_in5		66		-99	17103	5	1	1
chrV 18620359-18620525 -	NM_075236_in1		116		-99	17103	6	0	7
chrV 18634250-18634395 -	NM_075237_in15		95		-99	17103	8	0	3
chrII 2022090-2022243 +	NM_061752_in9		103		-99	17103	1552	453	28
chrI 3354428-3354544 +	NM_058746_in4		66		-99	17103	519	0	45
chrII 5101310-5101469 -	NM_062542_in3		109		-99	17103	8	0	2
chrIV 7708907-7709007 -	NM_068856_in3		50		-99	17103	6	2	2
chrI 47585-47720 +	NM_001026606_in1		85		-99	17103	12	0	11
chrV 19731960-19732061 -	NM_075422_in4		51		-99	17103	501	907	17
chrII 1957664-1957809 -	NM_061738_in5		95		-99	17103	14	13	2
chrI 2905304-2905431 +	NM_058670_in5		77		-99	17103	66	28	7
chrIV 13609247-13609382 -	NM_070224_in4		85		-99	17103	4362	1	73
chrV 8859721-8859822 -	NM_072880_in5		51		-99	17103	25	11	4
chrV 11486880-11486983 +	NM_001028964_in4		53		-99	17103	10	10	2
chrIV 12722742-12722853 +	NM_070029_in3		61		-99	17103	5	2	1
chrI 12435760-12435861 +	NM_060753_in1		51		-99	17103	12	0	13
chrIV 12171179-12171283 -	NM_069911_in2		54		-99	17103	9	0	7
chrIV 2667221-2667377 +	NM_171900_in2		106		-99	17103	21	9	9
chrI 2327121-2327222 -	NM_058562_in9		51		-99	17103	29	0	8
chrIV 14783474-14783601 -	NM_001028358_in1		77		-99	17103	19	8	4
chrV 19772793-19772896 -	NM_001047684_in1		53		-99	17103	7	8	1
chrX 1695236-1695369 -	NM_075910_in8		83		-99	17103	64	8	6
chrIV 14573755-14573900 -	NM_070367_in1		95		-99	17103	8	4	11
chrII 2275198-2275298 -	NM_061824_in2		50		-99	17103	6	4	1
chrIII 1154672-1154785 +	NM_064939_in4		63		-99	17103	7	0	3
chrIV 15982025-15982164 -	NM_070507_in3		89		-99	17103	53	1	13
chrIV 15647190-15647346 -	NM_070481_in4		106		-99	17103	83	140	20
chrIV 6624452-6624584 -	NM_068620_in1		82		-99	17103	7	14	2
chrV 13650657-13650823 -	NM_073979_in1		116		-99	17103	6	11	1
chrV 14247623-14247780 -	NM_074123_in1		107		-99	17103	6	0	10
chrI 3644973-3645076 -	NM_058792_in5		53		-99	17103	5	5	1
chrII 8039336-8039506 -	NM_063283_in3		120		-99	17103	16	6	4
chrV 14157845-14157996 -	NM_074103_in1		101		-99	17103	13	10	1
chrII 11257490-11257592 +	NM_064007_in2		52		-99	17103	33	20	3
chrIV 11342146-11342285 -	NM_001028179_in2		89		-99	17103	23	30	2
chrI 8140108-8140235 -	NM_059829_in4		77		-99	17103	7	0	2
chrII 8982436-8982573 -	NM_063512_in11		87		-99	17103	16	8	3
chrIV 2146151-2146294 +	NM_001027928_in7		93		-99	17103	27	2	23
chrII 3407958-3408066 +	NM_062133_in5		58		-99	17103	8	2	3
chrII 2036166-2036269 -	NM_061759_in2		53		-99	17103	6	5	1
chrX 597019-597127 -	NM_001129657_in3		58		-99	17103	6	7	1
chrX 2243625-2243727 -	NM_076013_in1		52		-99	17103	83	216	10
chrV 20511822-20511928 -	NM_075551_in1		56		-99	17103	68	98	25
chrV 19375957-19376086 +	NM_075369_in9		79		-99	17103	16	0	6
chrIV 650350-650493 +	NM_067561_in2		93		-99	17103	8	3	5
chrV 15906355-15906485 +	NM_074577_in3		80		-99	17103	23	10	2
chrII 6511935-6512042 -	NM_062915_in6		57		-99	17103	9	8	1
chrV 7774742-7774847 +	NM_072604_in1		55		-99	17103	6	1	11
chrX 16468326-16468457 +	NM_078271_in19		81		-99	17103	20	12	2
chrI 252345-252448 +	NM_058305_in2		53		-99	17103	9	30	3
chrIII 11035149-11035294 +	NM_067019_in5		95		-99	17103	32	0	3
chrI 12995149-12995272 +	NM_060877_in4		73		-99	17103	5	0	1
chrV 20475674-20475780 +	NM_075539_in2		56		-99	17103	43	19	7
chrV 8685116-8685216 +	NM_072836_in5		50		-99	17103	6	4	2
chrIII 691589-691737 -	NM_064838_in2		98		-99	17103	11	6	2
chrIV 13769117-13769285 +	NM_001047570_in6		118		-99	17103	1198	1	46
chrX 1927254-1927421 +	NM_075952_in4		117		-99	17103	25	45	3
chrV 4561090-4561191 +	NM_071837_in2		51		-99	17103	163	133	20
chrV 12691101-12691202 +	NM_073767_in3		51		-99	17103	69	66	7
chrV 17670071-17670233 +	NM_075071_in4		112		-99	17103	5	0	2
chrI 211359-211519 +	NM_001026605_in5		110		-99	17103	6	18	3
chrI 1839168-1839276 +	NM_170806_in4		58		-99	17103	344	3051	16
chrI 6310012-6310169 +	NM_001047189_in3		107		-99	17103	9	8	2
chrIV 10338723-10338853 -	NM_001028123_in1		80		-99	17103	9	3	3
chrII 7251813-7251914 -	NM_063112_in5		51		-99	17103	15	23	5
chrX 4587619-4587753 +	NM_076386_in3		84		-99	17103	9	4	1
chrII 1946327-1946430 -	NM_061735_in8		53		-99	17103	546	536	24
chrIII 11319439-11319598 +	NM_067055_in5		109		-99	17103	6	0	8
chrIII 6041899-6042046 +	NM_065915_in4		97		-99	17103	7	5	1
chrIII 7299143-7299296 -	NM_066207_in2		103		-99	17103	6	4	1
chrV 16914882-16915011 +	NM_074872_in6		79		-99	17103	9	3	1
chrV 18763232-18763341 +	NM_075262_in4		59		-99	17103	50	1	19
chrIII 2805556-2805657 +	NM_065221_in1		51		-99	17103	8	13	10
chrIII 12273059-12273182 -	NM_067195_in13		73		-99	17103	6	0	4
chrIII 2724735-2724877 -	NM_065205_in5		92		-99	17103	6	2	1
chrIII 8934311-8934414 +	NM_066576_in1		53		-99	17103	31	147	2
chrIV 13978923-13979060 -	NM_001083253_in17		87		-99	17103	6	0	3
chrIII 10848386-10848498 -	NM_066988_in1		62		-99	17103	34	53	7
chrV 8831220-8831364 +	NM_072884_in3		94		-99	17103	8	1	5
chrIII 11913893-11914004 -	NM_067147_in5		61		-99	17103	5	0	5
chrIV 5869908-5870035 -	NM_068475_in7		77		-99	17103	3526	55	44
chrIV 9547548-9547654 +	NM_001047519_in2		56		-99	17103	9	175	2
chrV 8706472-8706586 -	NM_072842_in1		64		-99	17103	12	7	12
chrV 19973306-19973408 -	NM_075466_in3		52		-99	17103	7	13	1
chrV 13424003-13424103 +	NM_073928_in1		50		-99	17103	6	0	5
chrIII 1697909-1698021 -	NM_065045_in1		62		-99	17103	6	0	4
chrV 5191750-5191852 -	NM_071991_in2		52		-99	17103	27	85	3
chrIV 4040572-4040716 +	NM_068063_in2		94		-99	17103	7	6	2
chrV 15479901-15480069 -	NM_074453_in2		118		-99	17103	2216	0	57
chrIV 14003697-14003849 +	NM_070284_in1		102		-99	17103	1318	0	68
chrV 3573268-3573369 +	NM_071604_in4		51		-99	17103	9	49	3
chrV 14990871-14990995 -	NM_074284_in7		74		-99	17103	12	0	4
chrX 5480922-5481048 +	NM_001029260_in2		76		-99	17103	19	0	28
chrV 20458193-20458314 -	NM_075535_in9		71		-99	17103	35	56	4
chrIII 2457559-2457660 +	NM_065159_in3		51		-99	17103	5	14	2
chrII 8086953-8087113 -	NM_063295_in11		110		-99	17103	22	11	3
chrV 397398-397498 +	NM_070787_in2		50		-99	17103	8	13	1
chrV 20204224-20204370 -	NM_075500_in1		96		-99	17103	41	14	4
chrX 15711789-15711947 +	NM_001029828_in9		108		-99	17103	37	37	2
chrX 4207107-4207208 -	NM_076316_in2		51		-99	17103	6	29	1
chrX 2716973-2717127 -	NM_171638_in9		104		-99	17103	5	0	2
chrIII 4785000-4785108 -	NM_065584_in5		58		-99	17103	7	2	2
chrX 1203495-1203636 -	NM_075826_in1		91		-99	17103	11	1	2
chrIII 8029436-8029552 -	NM_066349_in4		66		-99	17103	6	13	1
chrIV 14897440-14897604 +	NM_001028350_in13		114		-99	17103	199	1	25
chrII 9060778-9060937 -	NM_001027186_in2		109		-99	17103	8	8	1
chrV 8685797-8685929 +	NM_072836_in8		82		-99	17103	30	26	4
chrX 2989401-2989530 +	NM_076110_in12		79		-99	17103	14	5	2
chrIV 15514628-15514744 -	NM_070466_in1		66		-99	17103	9	12	3
chrII 14173117-14173242 -	NM_064559_in2		75		-99	17103	68	82	6
chrIV 13631949-13632052 +	NM_070229_in3		53		-99	17103	9	28	1
chrII 6715476-6715593 +	NM_062966_in4		67		-99	17103	5	0	2
chrV 2596119-2596268 -	NM_071311_in1		99		-99	17103	13	31	4
chrIII 2968008-2968151 -	NM_065244_in5		93		-99	17103	107	96	9
chrIII 4800603-4800737 +	NM_065588_in7		84		-99	17103	11	0	9
chrI 12996034-12996137 +	NM_060878_in2		53		-99	17103	16	4	4
chrV 18758098-18758207 -	NM_075261_in1		59		-99	17103	50	1	19
chrII 2291567-2291735 -	NM_061826_in3		118		-99	17103	6	21	1
chrV 20441207-20441307 -	NM_075532_in1		50		-99	17103	42	10	6
chrI 13489622-13489730 +	NM_060970_in1		58		-99	17103	21	0	5
chrIII 3663814-3663916 -	NM_065342_in10		52		-99	17103	12	4	12
chrII 7447189-7447296 +	NM_063157_in3		57		-99	17103	5	5	1
chrI 7698515-7698616 +	NM_001026466_in2		51		-99	17103	5	1	1
chrX 12862145-12862312 -	NM_077742_in1		117		-99	17103	7	5	1
chrX 14963688-14963849 +	NM_078081_in4		111		-99	17103	5	0	2
chrV 19317629-19317734 +	NM_075361_in1		55		-99	17103	47	1	18
chrII 11609194-11609364 +	NM_064081_in5		120		-99	17103	7	2	1
chrV 18193241-18193396 +	NM_075156_in2		105		-99	17103	7	0	3
chrI 5044412-5044543 -	NM_059107_in1		81		-99	17103	11	0	5
chrII 7713860-7713988 -	NM_063221_in9		78		-99	17103	6	0	7
chrV 16642994-16643141 -	NM_074810_in3		97		-99	17103	10	3	2
chrI 3339750-3339864 +	NM_058744_in3		64		-99	17103	5	1	13
chrV 8337688-8337822 +	NM_072750_in4		84		-99	17103	8	4	6
chrIV 322570-322711 -	NM_067503_in3		91		-99	17103	1339	22296	56
chrII 1944978-1945081 -	NM_061735_in3		53		-99	17103	298	508	18
chrX 48179-48293 +	NM_075679_in2		64		-99	17103	7	5	2
chrX 14661610-14661711 +	NM_078034_in21		51		-99	17103	29	46	4
chrII 1900871-1900972 +	NM_061715_in3		51		-99	17103	23	18	4
chrV 3562252-3562357 -	NM_071601_in3		55		-99	17103	11	48	3
chrIII 1404903-1405008 +	NM_001027793_in1		55		-99	17103	6	17	1
chrV 7857037-7857189 +	NM_171932_in7		102		-99	17103	12	26	2
chrX 229621-229763 -	NM_075641_in7		92		-99	17103	5	4	1
chrIV 5714070-5714233 +	NM_068449_in10		113		-99	17103	2729	0	64
chrX 4852883-4853004 -	NM_076424_in28		71		-99	17103	5	1	1
chrII 12154019-12154138 +	NM_064183_in8		69		-99	17103	6	14	2
chrIII 13412356-13412522 +	NM_001027419_in8		116		-99	17103	25	12	2
chrI 11617741-11617845 -	NM_060562_in4		54		-99	17103	8	8	1
chrII 10008908-10009051 +	NM_063763_in4		93		-99	17103	566	3	31
chrII 13655024-13655124 +	NM_001129120_in4		50		-99	17103	1902	264	39
chrI 9630948-9631116 +	NM_001026439_in10		118		-99	17103	75	86	33
chrV 12696516-12696617 +	NM_001028878_in3		51		-99	17103	55	14	7
chrV 18350274-18350384 +	NM_075188_in1		60		-99	17103	8	0	9
chrII 12804927-12805071 -	NM_001129184_in6		94		-99	17103	9	3	3
chrI 4823109-4823216 +	NM_059055_in4		57		-99	17103	7	2	2
chrV 20380566-20380666 -	NM_075527_in2		50		-99	17103	3438	11923	38
chrII 13539916-13540076 -	NM_064444_in5		110		-99	17103	5	1	1
chrIII 9462070-9462171 +	NM_001025962_in10		51		-99	17103	9	15	2
chrIII 6277673-6277815 -	NM_171160_in2		92		-99	17103	5	9	2
chrI 3066748-3066860 +	NM_058696_in9		62		-99	17103	8	0	2
chrI 216067-216169 +	NM_058294_in1		52		-99	17103	29	52	4
chrIV 6251939-6252108 +	NM_068543_in3		119		-99	17103	14	1	3
chrI 903306-903408 +	NM_058389_in5		52		-99	17103	5	2	3
chrII 3349218-3349324 -	NM_182259_in5		56		-99	17103	9	2	2
chrV 18564583-18564718 -	NM_075230_in5		81		-99	17103	5	0	3
chrI 12349617-12349719 -	NM_060724_in8		52		-99	17103	6	1	1
chrV 7877498-7877619 +	NM_001028732_in1		71		-99	17103	35	0	15
chrV 20847073-20847176 -	NM_075627_in2		53		-99	17103	57	87	7
chrX 177594-177720 +	NM_075656_in2		76		-99	17103	76	17	6
chrX 257364-257472 +	NM_182461_in2		58		-99	17103	31	96	8
chrI 12652897-12653052 +	NM_001026357_in3		105		-99	17103	249	51	3
chrIV 15537813-15537952 -	NM_070469_in8		89		-99	17103	9	5	3
chrV 12865949-12866098 +	NM_073820_in1		99		-99	17103	10	3	10
chrIII 8686002-8686171 +	NM_066513_in4		119		-99	17103	16	5	2
chrIV 16832766-16832868 +	NM_070595_in5		52		-99	17103	44	384	5
chrV 18386303-18386426 -	NM_075195_in1		73		-99	17103	18	0	14
chrIV 4185844-4185974 -	NM_068107_in3		80		-99	17103	16	33	3
chrX 4206202-4206305 -	NM_076315_in2		53		-99	17103	6	89	3
chrIII 10907567-10907687 +	NM_066998_in2		70		-99	17103	6	7	1
chrI 12759803-12759973 -	NM_060835_in1		120		-99	17103	11	4	2
chrIV 4142750-4142853 -	NM_068092_in4		53		-99	17103	24	18	4
chrIII 179614-179733 +	NM_064769_in1		69		-99	17103	5	12	2
chrIII 183399-183512 +	NM_064770_in1		63		-99	17103	7	4	1
chrIV 2667609-2667762 +	NM_171292_in4		103		-99	17103	5	5	2
chrV 20910978-20911102 +	NM_001029068_in1		74		-99	17103	24	1402	22
chrI 4458307-4458407 +	NM_058974_in5		50		-99	17103	41	278	5
chrV 10583080-10583235 +	NM_073314_in4		105		-99	17103	6	1	1
chrX 13350217-13350319 -	NM_077822_in2		52		-99	17103	7	4	2
chrX 7068225-7068381 -	NM_076789_in3		106		-99	17103	5	4	2
chrII 1667550-1667666 -	NM_061633_in1		66		-99	17103	5	8	1
chrIII 10264642-10264773 -	NM_066872_in3		81		-99	17103	5	0	2
chrII 12151528-12151628 +	NM_064182_in4		50		-99	17103	14	25	5
chrII 2148647-2148788 +	NM_061797_in4		91		-99	17103	413	296	18
chrII 3606845-3606954 +	NM_062192_in8		59		-99	17103	6	1	3
chrIII 10626005-10626131 +	NM_066941_in11		76		-99	17103	15	33	2
chrIII 5410849-5410993 +	NM_065752_in5		94		-99	17103	35	0	37
chrX 5850283-5850393 +	NM_076580_in3		60		-99	17103	76	31	5
chrI 12354366-12354473 +	NM_060726_in3		57		-99	17103	60	0	31
chrII 12120788-12120893 +	NM_064177_in1		55		-99	17103	7	21	2
chrX 9305335-9305451 +	NM_077168_in6		66		-99	17103	6	0	2
chrII 3408817-3408946 +	NM_062133_in9		79		-99	17103	47	20	8
chrV 445726-445826 -	NM_070803_in3		50		-99	17103	38	47	6
chrII 2035879-2035983 -	NM_061759_in1		54		-99	17103	10	44	2
chrI 3616065-3616169 +	NM_058786_in6		54		-99	17103	81	1	15
chrX 8180523-8180627 +	NM_076978_in9		54		-99	17103	7	0	11
chrX 6607311-6607438 +	NM_001129641_in2		77		-99	17103	8	18	2
chrIV 12863100-12863200 +	NM_070048_in9		50		-99	17103	19	1	33
chrI 10034184-10034338 -	NM_060250_in1		104		-99	17103	27	15	2
chrX 10611869-10612027 -	NM_077376_in11		108		-99	17103	10	14	2
chrII 1099818-1099925 -	NM_061510_in6		57		-99	17103	12	0	14
chrX 4103814-4103922 -	NM_076296_in1		58		-99	17103	96	31	9
chrV 14049770-14049901 +	NM_074089_in2		81		-99	17103	9	20	2
chrX 15211543-15211687 -	NM_078126_in7		94		-99	17103	8	0	2
chrII 1997170-1997271 +	NM_061745_in3		51		-99	17103	9	16	2
chrV 12661402-12661508 -	NM_073764_in1		56		-99	17103	34	67	5
chrI 14622860-14623022 -	NM_001026528_in4		112		-99	17103	9	7	6
chrX 13282952-13283052 -	NM_077806_in4		50		-99	17103	6	4	1
chrIV 9243304-9243428 -	NM_069208_in5		74		-99	17103	5	0	2
chrIV 5812275-5812381 -	NM_068467_in1		56		-99	17103	7	2	4
chrIV 5841086-5841187 +	NM_068469_in4		51		-99	17103	557	5	31
chrIII 825410-825562 +	NM_064866_in3		102		-99	17103	53	14	5
chrII 8219002-8219103 +	NM_001136348_in2		51		-99	17103	9	4	2
chrII 3451795-3451928 +	NM_062145_in2		83		-99	17103	108	57	9
chrIII 12054465-12054567 -	NM_067169_in3		52		-99	17103	6	1	2
chrIV 3394444-3394594 +	NM_067937_in1		100		-99	17103	33	16	15
chrI 7892082-7892215 +	NM_059778_in5		83		-99	17103	5	15	2
chrIII 12928008-12928176 -	NM_067285_in1		118		-99	17103	12	1	2
chrII 14796790-14796910 +	NM_001027299_in4		70		-99	17103	5	4	1
chrI 2639116-2639231 +	NM_058616_in4		65		-99	17103	13	40	2
chrV 9708852-9708953 -	NM_073100_in2		51		-99	17103	28	8	5
chrII 1916897-1917008 -	NM_061721_in1		61		-99	17103	32	0	19
chrIII 10642733-10642845 -	NM_066945_in5		62		-99	17103	19	0	10
chrII 3503382-3503500 +	NM_062162_in2		68		-99	17103	5	0	6
chrIV 11341498-11341603 -	NM_001028178_in1		55		-99	17103	13	38	2
chrIV 8147798-8147932 +	NM_171392_in7		84		-99	17103	14	0	7
chrX 5370691-5370800 +	NM_076512_in7		59		-99	17103	20	24	2
chrIII 12351680-12351798 +	NM_067203_in1		68		-99	17103	105	2	15
chrIII 818584-818687 +	NM_001025959_in1		53		-99	17103	130	110	10
chrX 1695545-1695645 -	NM_075910_in9		50		-99	17103	23	51	3
chrV 8817627-8817728 -	NM_072866_in10		51		-99	17103	25	11	4
chrII 2021860-2021964 +	NM_061752_in8		54		-99	17103	107	209	13
chrIV 4185101-4185202 -	NM_068107_in1		51		-99	17103	9	43	2
chrX 8418216-8418317 -	NM_077027_in3		51		-99	17103	14	2	2
chrI 6383620-6383769 +	NM_059441_in15		99		-99	17103	8	0	11
chrIV 9502169-9502314 +	NM_069279_in7		95		-99	17103	19	1	9
chrIV 6525563-6525669 +	NM_068592_in4		56		-99	17103	9	3	3
chrIII 13412016-13412163 +	NM_001027419_in6		97		-99	17103	5	6	1
chrX 13139107-13139238 +	NM_077781_in16		81		-99	17103	12	0	7
chrV 425783-425898 +	NM_070796_in6		65		-99	17103	13	2	2
chrV 20472740-20472842 -	NM_075538_in2		52		-99	17103	6	17	1
chrIII 7716175-7716326 +	NM_066279_in1		101		-99	17103	31	23	15
chrX 7824183-7824285 +	NM_182443_in2		52		-99	17103	39	22	4
chrI 7657324-7657428 -	NM_059732_in1		54		-99	17103	5	1	2
chrV 14893079-14893180 -	NM_074270_in4		51		-99	17103	12	0	2
chrI 8803556-8803656 -	NM_059978_in9		50		-99	17103	5	3	5
chrI 2064375-2064476 +	NM_058522_in1		51		-99	17103	5	2	7
chrIII 1382964-1383081 -	NM_064998_in5		67		-99	17103	6	4	1
chrI 8283481-8283628 +	NM_059852_in3		97		-99	17103	7	3	1
chrII 6509880-6509982 -	NM_062915_in1		52		-99	17103	7	6	2
chrI 2638813-2638931 +	NM_058616_in2		68		-99	17103	22	9	2
chrV 726060-726178 -	NM_070905_in2		68		-99	17103	5	3	2
chrX 15933413-15933518 -	NM_078215_in10		55		-99	17103	132	190	20
chrX 11445193-11445357 -	NM_077514_in3		114		-99	17103	54	35	6
chrI 1691181-1691304 -	NM_001026653_in4		73		-99	17103	5	1	2
chrV 20900521-20900621 +	NM_075634_in4		50		-99	17103	6	8	3
chrV 13712958-13713084 +	NM_073991_in6		76		-99	17103	290	90	16
chrV 10832103-10832245 +	NM_073366_in19		92		-99	17103	20	0	6
chrV 19389870-19390026 -	NM_075372_in8		106		-99	17103	17	0	12
chrII 12838177-12838308 -	NM_001027267_in6		81		-99	17103	23	0	20
chrIV 13728126-13728290 +	NM_001027898_in1		114		-99	17103	1321	0	60
chrII 1902905-1903005 +	NM_061716_in3		50		-99	17103	7	16	4
chrX 13988739-13988894 +	NM_077930_in5		105		-99	17103	62	19	29
chrI 912550-912651 -	NM_001129086_in1		51		-99	17103	12	21	2
chrV 20603638-20603738 -	NM_075575_in3		50		-99	17103	8	1	1
chrV 19472159-19472315 +	NM_075387_in2		106		-99	17103	75	0	11
chrI 12740734-12740845 +	NM_060830_in4		61		-99	17103	8	12	2
chrIII 886580-886691 -	NM_171079_in6		61		-99	17103	5	1	5
chrV 13512703-13512839 -	NM_073950_in2		86		-99	17103	6	1	1
chrIII 11338060-11338220 +	NM_181929_in4		110		-99	17103	10	3	1
chrX 8814391-8814493 +	NM_077092_in9		52		-99	17103	6	0	5
chrII 1957142-1957243 -	NM_061738_in3		51		-99	17103	9	16	2
chrIV 4863943-4864050 +	NM_068258_in6		57		-99	17103	15	0	4
chrX 7303360-7303471 -	NM_076828_in5		61		-99	17103	6	0	4
chrIII 2482878-2483005 +	NM_065165_in13		77		-99	17103	13	5	3
chrI 3465627-3465734 -	NM_058763_in8		57		-99	17103	22	1	10
chrI 2905144-2905246 +	NM_058670_in4		52		-99	17103	15	166	2
chrIV 5685313-5685466 +	NM_068446_in1		103		-99	17103	7	11	2
chrI 4003126-4003296 -	NM_001026327_in10		120		-99	17103	8	0	3
chrIV 770678-770793 -	NM_067584_in3		65		-99	17103	32	51	10
chrIII 12314006-12314144 +	NM_001027776_in3		88		-99	17103	24	30	5
chrV 18376033-18376154 +	NM_075193_in5		71		-99	17103	17	0	5
chrV 20722668-20722773 -	NM_182370_in14		55		-99	17103	74	91	6
chrIV 16900617-16900751 -	NM_070601_in2		84		-99	17103	246	2	30
chrIV 14244164-14244333 -	NM_070332_in3		119		-99	17103	345	0	32
chrII 11914834-11914935 +	NM_064142_in3		51		-99	17103	8	5	2
chrIV 6157668-6157836 -	NM_171352_in2		118		-99	17103	7	2	2
chrII 8842167-8842320 -	NM_063483_in6		103		-99	17103	77	122	5
chrI 11239925-11240076 -	NM_060482_in1		101		-99	17103	12	13	3
chrI 12561297-12561417 -	NM_060784_in1		70		-99	17103	10	2	4
chrIII 1806194-1806303 +	NM_065058_in16		59		-99	17103	5	3	2
chrV 424652-424796 +	NM_070796_in1		94		-99	17103	26	10	3
chrX 12044105-12044220 -	NM_077614_in3		65		-99	17103	20	10	2
chrII 1769385-1769528 +	NM_182203_in4		93		-99	17103	6	1	1
chrIV 11370615-11370770 -	NM_069743_in11		105		-99	17103	21	8	2
chrV 3562740-3562847 -	NM_071601_in6		57		-99	17103	164	475	11
chrV 2638750-2638873 +	NM_071321_in1		73		-99	17103	20	7	3
chrI 2053316-2053437 -	NM_058520_in5		71		-99	17103	6	0	5
chrV 4634975-4635082 +	NM_071847_in5		57		-99	17103	7	8	3
chrII 3580974-3581143 +	NM_062186_in5		119		-99	17103	110	0	36
chrII 593911-594014 -	NM_061365_in3		53		-99	17103	10	24	6
chrIII 13690463-13690612 +	NM_001027838_in5		99		-99	17103	13	3	3
chrX 16516975-16517075 +	NM_078277_in5		50		-99	17103	23	52	3
chrX 6006048-6006150 +	NM_076603_in7		52		-99	17103	6	2	1
chrIV 13404185-13404330 -	NM_001028374_in1		95		-99	17103	9	1	10
chrI 7892755-7892857 +	NM_059778_in8		52		-99	17103	6	17	1
chrV 447793-447931 -	NM_070804_in1		88		-99	17103	20	10	1
chrIII 4407117-4407276 +	NM_065490_in3		109		-99	17103	37	10	15
chrI 7938023-7938137 -	NM_059787_in3		64		-99	17103	112	107	17
chrIV 12675237-12675359 +	NM_001028228_in1		72		-99	17103	5	0	1
chrIII 12430790-12430941 +	NM_067220_in2		101		-99	17103	12	0	3
chrX 2959093-2959194 +	NM_171646_in4		51		-99	17103	6	11	2
chrIV 2898419-2898523 -	NM_067868_in5		54		-99	17103	171	319	12
chrIII 3843258-3843362 -	NM_065376_in4		54		-99	17103	22	62	4
chrI 2545839-2545966 +	NM_058592_in3		77		-99	17103	45	33	4
chrV 2151849-2151951 +	NM_071181_in1		52		-99	17103	6	1	4
chrI 14341903-14342055 -	NM_170933_in1		102		-99	17103	10	1	15
chrV 14049212-14049349 -	NM_074086_in1		87		-99	17103	12	7	5
chrV 20437272-20437373 -	NM_075531_in6		51		-99	17103	89	250	25
chrIII 9769267-9769367 +	NM_066760_in7		50		-99	17103	17	2	6
chrV 20896327-20896440 -	NM_075633_in3		63		-99	17103	8	13	2
chrIV 6977102-6977219 -	NM_001047601_in8		67		-99	17103	29	24	10
chrIII 11291254-11291356 +	NM_001136370_in3		52		-99	17103	5	1	2
chrIV 12506258-12506395 +	NM_069993_in2		87		-99	17103	5	15	1
chrIV 12930774-12930889 +	NM_001047452_in1		65		-99	17103	31	87	13
chrII 2533689-2533790 -	NM_061891_in1		51		-99	17103	14	69	2
chrIII 2840744-2840871 -	NM_065226_in6		77		-99	17103	13	0	3
chrV 2962888-2962995 -	NM_071405_in3		57		-99	17103	21	0	5
chrII 2154100-2154203 +	NM_061800_in1		53		-99	17103	30	97	3
chrIII 9052008-9052111 -	NM_066602_in1		53		-99	17103	6	11	1
chrX 4104107-4104261 -	NM_076296_in3		104		-99	17103	11	22	1
chrI 13233039-13233139 +	NM_060919_in4		50		-99	17103	16	0	10
chrIII 3509020-3509129 -	NM_001027515_in9		59		-99	17103	5	4	1
chrI 3732001-3732109 +	NM_058807_in3		58		-99	17103	13	41	3
chrIV 3793620-3793753 +	NM_001047533_in5		83		-99	17103	43	86	4
chrII 3298876-3298982 +	NM_182266_in2		56		-99	17103	5	2	1
chrV 14734840-14734955 -	NM_074238_in1		65		-99	17103	5	6	2
chrV 329938-330074 -	NM_070774_in14		86		-99	17103	18	31	2
chrIV 8503928-8504063 -	NM_069054_in1		85		-99	17103	63	4	7
chrII 6371364-6371532 +	NM_062884_in1		118		-99	17103	549	1	75
chrV 8326309-8326431 -	NM_072748_in2		72		-99	17103	6	12	2
chrIV 1446453-1446558 +	NM_067682_in1		55		-99	17103	17	18	3
chrI 252158-252260 +	NM_058305_in1		52		-99	17103	29	52	4
chrIII 13548526-13548628 -	NM_067400_in4		52		-99	17103	21	63	3
chrV 20436529-20436631 -	NM_075531_in4		52		-99	17103	128	132	36
chrIII 6162827-6162988 +	NM_065935_in9		111		-99	17103	17	1	10
chrII 11707993-11708119 -	NM_064100_in2		76		-99	17103	5	0	2
chrIII 7144069-7144211 -	NM_001025943_in18		92		-99	17103	8	31	2
chrIV 13839423-13839570 +	NM_001028086_in10		97		-99	17103	11	1	2
chrI 14997431-14997555 +	NM_061213_in11		74		-99	17103	57	44	4
chrIII 12878573-12878681 +	NM_067278_in1		58		-99	17103	8	1	2
chrV 3089512-3089615 +	NM_071444_in3		53		-99	17103	16	0	17
chrII 11049386-11049553 -	NM_063968_in1		117		-99	17103	23	4	4
chrX 15284947-15285048 +	NM_078133_in4		51		-99	17103	6	37	1
chrIV 16946344-16946455 -	NM_070609_in7		61		-99	17103	8	0	3
chrX 4591498-4591605 -	NM_076388_in1		57		-99	17103	9	19	2
chrII 10259420-10259524 +	NM_001129142_in10		54		-99	17103	6	4	1
chrII 5318850-5318953 +	NM_062595_in5		53		-99	17103	13	25	3
chrIV 12097939-12098046 +	NM_069894_in3		57		-99	17103	16	1	5
chrII 6550333-6550455 +	NM_062922_in7		72		-99	17103	5	1	1
chrI 10034561-10034681 -	NM_060250_in2		70		-99	17103	18	6	3
chrIV 4040400-4040517 +	NM_068063_in1		67		-99	17103	6	1	1
chrI 2272608-2272712 -	NM_058548_in32		54		-99	17103	5	0	1
chrX 13666369-13666494 -	NM_077888_in3		75		-99	17103	13	2	24
chrIII 1005116-1005275 +	NM_064911_in6		109		-99	17103	9	1	9
[truncated: 132 more rows]
